# Supplementary material for: Diversity-oriented heterocyclic synthesis using divergent reactivity of N-substituted iso(thio)cyanates
Source: Royal Society of Chemistry journal article supplement (doi:10.1039/c5cc07212c), 2015-01-01

# Diversity-Oriented Heterocyclic Synthesis using Divergent Reactivity of *N*-Substituted Iso(thio)cyanates

Jean-François Vincent-Rocan, Joshua S. Derasp, André M. Beauchemin\*

*Centre for Catalysis Research and Innovation, Department of Chemistry and Biomolecular Sciences, University of Ottawa. 10 Marie-Curie, Ottawa, ON, K1N 6N5, Canada.*

## Supplementary Information

### Table of Contents

|                            |            |
|----------------------------|------------|
| <b>General Information</b> | <b>S1</b>  |
| <b>Materials</b>           | <b>S2</b>  |
| <b>General Procedure A</b> | <b>S2</b>  |
| <b>References</b>          | <b>S21</b> |
| <b>Spectra</b>             | <b>S22</b> |

### **General Information.**

Purification of reaction products was carried out by flash column chromatography using Silicycle silica gel (40-63  $\mu\text{m}$ ), unless otherwise noted. Analytical thin layer chromatography (TLC) was performed on aluminum, cut to size. Visualization was accomplished with UV light followed by staining with a potassium permanganate solution and heating.

$^1\text{H}$  NMR and  $^{13}\text{C}$  NMR spectra were recorded on Bruker AVANCE 300 MHz and 400 MHz spectrometers at ambient temperature, unless otherwise indicated. Spectral data was reported in ppm using solvent as the reference ( $\text{CDCl}_3$  at 7.26 ppm,  $\text{C}_6\text{D}_6$  at 7.15 ppm or  $\text{DMSO-}d_6$  at 2.50 ppm for  $^1\text{H}$  NMR and  $\text{CDCl}_3$  at 77.0 ppm or  $\text{DMSO-}d_6$  at 39.43 for  $^{13}\text{C}$  NMR).  $^1\text{H}$  NMR data was reported as: multiplicity (ap = apparent, br = broad, s = singlet, d = doublet, t = triplet, q = quartet, quint. = quintet, sext. = sextuplet, sept = septuplet, m = multiplet), integration and coupling constant(s) in Hz. Infrared (IR) spectra were obtained with neat thin films on a sodium chloride disk and were recorded on a Bomem Michelson 100 Fourier transform infrared spectrometer (FTIR). High-resolution mass spectroscopy (HRMS) was performed on a Kratos Concept-11A mass spectrometer with an electron beam of 70eV at the Ottawa-Carleton Mass Spectrometry Centre.

## Materials

Unless otherwise noted, all commercially available materials were purchased from commercial sources and used without further purification.

**General procedure A<sup>a</sup>:** An oven-dried 5 mL microwave tube was charged with a stir bar, a carbarzone (1.0 equiv.), a propargylic amine (1.1 equiv.), Et<sub>3</sub>N (20 mol %) and MeCN (0.3 M). The septum was removed and the tube was then quickly sealed with a microwave cap and heated for 2-6 hours at 100-150 °C in a microwave (μW) reactor. The tube was cooled to ambient temperature, concentrated under reduced pressure and purified by silica gel chromatography to give the corresponding products.

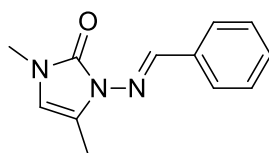

**(E)-3-(Benzylideneamino)-1,4-dimethyl-1H-imidazol-2(3H)-one ( Table 1, 2a ) :** Synthesized according to general procedure A using carbarzone **1a**<sup>1</sup> (0.144 g, 0.600 mmol), *N*-methylpropargylamine (0.0460 g, 0.660 mmol), Et<sub>3</sub>N ( 0.0120 g, 0.120 mmol) and MeCN (2.0 mL) and heated at 100 °C for 2 hours. The crude mixture was purified by column chromatography using 35 % EtOAc/Hexane and the pure compound was obtained as an off-white solid (0.126 g, 87 %). TLC R<sub>f</sub> = 0.21 in 35% EtOAc/Hexane. <sup>1</sup>H NMR (400 MHz; CDCl<sub>3</sub>) δ 9.89 (s, 1H), 7.74-7.71 (m, 3H), 7.38-7.34 (m, 3H), 5.87 (q, *J* = 1.37 Hz, 1H), 3.17 (s, 3H), 2.13 (d, *J* = 1.4 Hz, 3H). <sup>13</sup>C NMR (100 MHz; CDCl<sub>3</sub>): δ 150.9 (CH), 150.1 (C), 135.2 (C), 130.2 (CH), 128.6 (CH), 127.4 (CH), 120.0 (C), 106.0 (CH), 30.0 (CH<sub>3</sub>), 10.0 (CH<sub>3</sub>). IR (film): 2955, 2853, 1653, 1522, 1506, 1394, 903 cm<sup>-1</sup>. HRMS (EI): Exact mass calcd for C<sub>12</sub>H<sub>13</sub>N<sub>3</sub>O [M]<sup>+</sup>: 215.1059. Found: 215.1056.

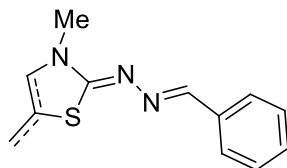

**Equation 1 :** Synthesized according to general procedure A using thiosemicarbazone **1n**<sup>6</sup> (0.180 g, 0.600 mmol), *N*-methylpropargylamine (0.0460 g, 0.660 mmol), Et<sub>3</sub>N ( 0.0120 g, 0.120 mmol) and MeCN (2.0 mL) and heated at 120 °C for 2 hours. NMR analysis showed a ratio of 63 / 37 of products with exocyclic and endocyclic double bonds. A 6 hours reaction gave 67 % (exo) and 27 % and 2 hours at 150 °C gave 70 % and 27 % while comparing to phenol production.

<sup>a</sup> During the optimization process, it has been observed that partial cyclization could also be obtained at 50 °C using DBU as base (20 mol%) in THF(0.3 M). Using **2a** under these conditions, 38% of product **2a** along with 62% of the uncyclized substitution product was observed after 18 hours.

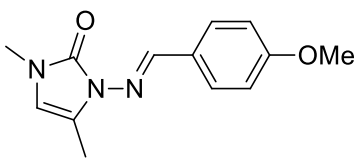

**(E)-3-((4-Methoxybenzylidene)amino)-1,4-dimethyl-1H-imidazol-2(3H)-one (Table 2, 2b):** Synthesized according to general procedure A using carbazone **1b**<sup>1</sup> (0.162 g, 0.600 mmol), *N*-methylpropargylamine (0.0460 g, 0.660 mmol), Et<sub>3</sub>N (0.0120 g, 0.120 mmol) and MeCN (2.0 mL) and heated at 100 °C for 2 hours. The crude mixture was purified by column chromatography using 10 % EtOAc/CH<sub>2</sub>Cl<sub>2</sub> and the pure compound was obtained as a off-white solid (0.126 g, 87 %). TLC R<sub>f</sub> = 0.18 in 10% EtOAc/CH<sub>2</sub>Cl<sub>2</sub>. <sup>1</sup>H NMR (300 MHz; CDCl<sub>3</sub>): δ 9.84 (s, 1H), 7.74-7.69 (m, 2H), 6.96-6.91 (m, 2H), 5.91-5.90 (m, 1H), 3.85 (s, 3H), 3.23 (s, 3H), 2.16 (s, 3H). <sup>13</sup>C NMR (100 MHz; CDCl<sub>3</sub>): δ 161.3 (C), 151.1 (CH), 129.9 (CH), 127.9 (C), 120.0 (C), 114.0 (CH), 105.6 (CH), 55.3 (CH<sub>3</sub>), 29.9 (CH<sub>3</sub>), 9.9 (CH<sub>3</sub>). IR (film): 1674, 1653, 1609, 1516, 1398, 1263, 1250, 1180, 1169, 1030 cm<sup>-1</sup>. HRMS (EI): Exact mass calcd for C<sub>13</sub>H<sub>15</sub>N<sub>3</sub>O<sub>2</sub> [M]<sup>+</sup>: 245.1164. Found: 245.1123.

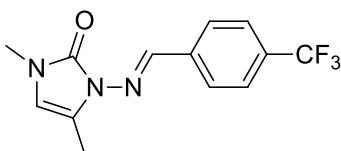

**(E)-1,4-Dimethyl-3-((4-(trifluoromethyl)benzylidene)amino)-1H-imidazol-2(3H)-one (Table 2, 2c):** Synthesized according to general procedure A using carbazone **1c**<sup>2</sup> (0.185 g, 0.600 mmol), *N*-methylpropargylamine (0.0460 g, 0.660 mmol), Et<sub>3</sub>N (0.0120 g, 0.120 mmol) and MeCN (2.0 mL) and heated at 100 °C for 2 hours. The crude mixture was purified by column chromatography using 10 % EtOAc/CH<sub>2</sub>Cl<sub>2</sub> and the pure compound was obtained as a yellow solid (0.141 g, 83 %). TLC R<sub>f</sub> = 0.32 in 10% EtOAc/CH<sub>2</sub>Cl<sub>2</sub>. <sup>1</sup>H NMR (300 MHz; CDCl<sub>3</sub>): δ 10.00 (s, 1H), 7.87 (d, *J* = 8.1 Hz, 2H), 7.66 (d, *J* = 8.1 Hz, 2H), 5.98-5.92 (m, 1H), 3.24 (s, 3H), 2.18 (s, 3H). <sup>13</sup>C NMR (100 MHz; CDCl<sub>3</sub>): δ 148.8 (CH), 127.3 (CH), 125.5 (CH), 119.9 (C), 106.4 (CH), 29.9 (CH<sub>3</sub>), 9.9 (CH<sub>3</sub>). IR (film): 1680, 1560, 1429, 1400, 1321, 1255, 1180, 1166 cm<sup>-1</sup>. HRMS (EI): Exact mass calcd for C<sub>13</sub>H<sub>12</sub>N<sub>3</sub>OF<sub>3</sub> [M]<sup>+</sup>: 283.0932. Found: 283.0983.

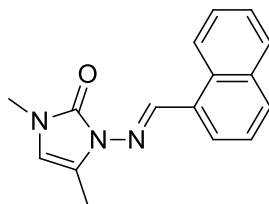

**(E)-1,4-Dimethyl-3-((naphthalen-1-ylmethylene)amino)-1H-imidazol-2(3H)-one (Table 2, 2d) :** Synthesized according to general procedure A using carbazone **1d**<sup>1</sup> (0.174 g, 0.600 mmol), *N*-methylpropargylamine (0.0460 g, 0.660 mmol), Et<sub>3</sub>N (0.0120 g, 0.120 mmol) and MeCN (2.0 mL) and heated at 100 °C for 6 hours. The crude mixture was purified by column chromatography using 10 % EtOAc/CH<sub>2</sub>Cl<sub>2</sub> and the pure compound was obtained as a yellow solid (0.146 g, 92 %). TLC R<sub>f</sub> = 0.37 in 10% EtOAc/CH<sub>2</sub>Cl<sub>2</sub>. <sup>1</sup>H NMR (300 MHz; CDCl<sub>3</sub>): δ

10.71 (s, 1H), 8.67 (dd,  $J = 8.3, 0.9$  Hz, 1H), 8.06 (dd,  $J = 7.3, 1.0$  Hz, 1H), 7.93-7.88 (m, 2H), 7.61-7.50 (m, 3H), 5.96 (q,  $J = 1.2$  Hz, 1H), 3.27 (s, 3H), 2.25 (s, 3H).  $^{13}\text{C}$  NMR (100 MHz;  $\text{CDCl}_3$ ):  $\delta$  150.6 (CH), 130.7 (CH), 130.7 (C), 128.6 (CH), 127.0 (C), 126.9 (CH), 126.4 (CH), 126.0 (CH), 125.3 (CH), 124.1 (CH), 120.1 (C), 29.9 ( $\text{CH}_3$ ), 10.1 ( $\text{CH}_3$ ). IR (film): 1693, 1564, 1539, 1472, 1420, 1288, 1265  $\text{cm}^{-1}$ . HRMS (EI): Exact mass calcd for  $\text{C}_{16}\text{H}_{15}\text{N}_3\text{O}$   $[\text{M}]^+$ : 265.1215. Found: 265.1224.

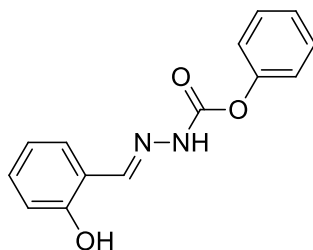

**(E)-Phenyl 2-(2-hydroxybenzylidene)hydrazinecarboxylate (Table 2, 1e):** Phenyl carbazate (2.53 g, 16.6 mmol) was dissolved in methanol (50.0 mL) completely in a round bottom flask charged with a stir bar. Salicylaldehyde (1.77 mL, 16.7 mmol) was then added to the mixture. The mixture was stirred at room temperature for 1 hour. The precipitate was then filtered and recrystallized in boiling EtOAc followed by a few drops of hexanes yielding the title compound as thin colorless needles (1.372 g, 32% yield).  $^1\text{H}$  NMR (300 MHz;  $\text{DMSO}-d_6$ ):  $\delta$  11.81 (br s, 1H), 10.71 (br s, 1H), 8.40 (br s, 1H), 7.56 (dd,  $J = 7.7, 1.6$  Hz, 1H), 7.47-7.40 (m, 2H), 7.30-7.21 (m, 4H), 6.93-6.86 (m, 2H).  $^{13}\text{C}$  NMR (75 MHz;  $\text{DMSO}-d_6$ ):  $\delta$  156.9 (C), 145.5 (C), 131.2 (CH), 139.5 (CH), 128.4 (CH), 125.6 (CH), 121.8 (CH), 119.4 (CH), 119.0 (C), 116.3 (CH). IR (film) 1684, 1675, 1663, 1649, 1514, 1456, 1393, 1307, 1248, 1166  $\text{cm}^{-1}$ . HRMS (EI): Exact mass calcd for  $\text{C}_{14}\text{H}_{12}\text{N}_2\text{O}_3$   $[\text{M}]^+$ : 256.0845 Found: 256.0850

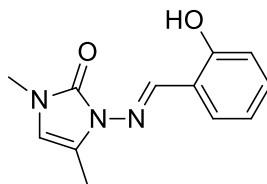

**(E)-3-((2-Hydroxybenzylidene)amino)-1,4-dimethyl-1H-imidazol-2(3H)-one (Table 2, 2e) :** Synthesized according to general procedure A using carbazone **1e** (0.154 g, 0.600 mmol), *N*-methylpropylamine (0.0460 g, 0.660 mmol),  $\text{Et}_3\text{N}$  (0.0120 g, 0.120 mmol) and MeCN (2.0 mL) and heated at 100  $^\circ\text{C}$  for 2 hours. The crude mixture was purified by column chromatography using 10 % EtOAc/ $\text{CH}_2\text{Cl}_2$  and the pure compound was obtained as a white solid (0.122 g, 92 %). TLC  $R_f = 0.4$  in 10% EtOAc/ $\text{CH}_2\text{Cl}_2$ .  $^1\text{H}$  NMR (300 MHz;  $\text{CDCl}_3$ ):  $\delta$  10.87 (br s, 1H), 9.99 (s, 1H), 7.35-7.26 (m, 2H), 6.99-6.99 (m, 2H), 5.96 (s, 1H), 3.24 (s, 3H), 2.16 (s, 3H).  $^{13}\text{C}$  NMR (100 MHz;  $\text{CDCl}_3$ ):  $\delta$  158.4 (C), 155.3 (CH), 132.1 (CH), 132.0 (CH), 119.7 (CH), 118.5 (C), 118.0 (C), 116.9 (CH), 106.5 (CH), 30.0 ( $\text{CH}_3$ ), 9.9 ( $\text{CH}_3$ ). IR (film): 1700, 1684, 1556, 1398, 1379, 1255  $\text{cm}^{-1}$ . HRMS (EI): Exact mass calcd for  $\text{C}_{12}\text{H}_{13}\text{N}_3\text{O}_2$   $[\text{M}]^+$ : 231.1008. Found: 231.1007.

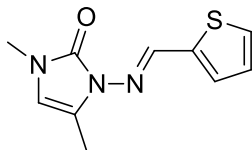

**(E)-1,4-Dimethyl-3-((thiophen-2-ylmethylene)amino)-1H-imidazol-2(3H)-one (Table 2, 2f)** : Synthesized according to general procedure A using carbazone **1f**<sup>1</sup> (0.148 g, 0.600 mmol), *N*-methylpropargylamine (0.0460 g, 0.660 mmol), Et<sub>3</sub>N ( 0.0120 g, 0.120 mmol) and MeCN (2.0 mL) and heated at 100 °C for 2 hours. The crude mixture was purified by column chromatography using 10 % EtOAc/CH<sub>2</sub>Cl<sub>2</sub> and the pure compound was obtained as a white solid (0.116 g, 87 %). TLC R<sub>f</sub> = 0.29 in 10% EtOAc/CH<sub>2</sub>Cl<sub>2</sub>. <sup>1</sup>H NMR (300 MHz; CDCl<sub>3</sub>): δ 10.06 (s, 1H), 7.36 (dd, *J* = 9.4, 4.3 Hz, 2H), 7.08-7.05 (m, 1H), 5.93-5.89 (m, 1H) 3.22 (s, 3H), 2.14 (s, 3H). <sup>13</sup>C NMR (100 MHz; CDCl<sub>3</sub>): δ 145.7 (CH), 140.4 (C), 130.6 (CH), 128.1 (CH), 127.5 (CH), 119.8 (C), 118.5 (C), 105.9 (CH), 29.9 (CH<sub>3</sub>), 9.8 (CH<sub>3</sub>). IR (film): 1690, 1431, 1397, 1387, 1310, 1256 cm<sup>-1</sup>. HRMS (EI): Exact mass calcd for C<sub>10</sub>H<sub>11</sub>N<sub>3</sub>OS [M]<sup>+</sup>: 221.0623. Found: 221.0599.

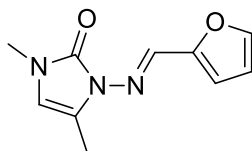

**(E)-3-((Furan-2-ylmethylene)amino)-1,4-dimethyl-1H-imidazol-2(3H)-one (Table 2, 2g)** : Synthesized according to general procedure A using carbazone **1g**<sup>1</sup> (0.138 g, 0.600 mmol), *N*-methylpropargylamine (0.0460 g, 0.660 mmol), Et<sub>3</sub>N ( 0.0120 g, 0.120 mmol) and MeCN (2.0 mL) and heated at 100 °C for 2 hours. The crude mixture was purified by column chromatography using 10 % EtOAc/CH<sub>2</sub>Cl<sub>2</sub> and the pure compound was obtained as a white solid (0.105 g, 85 %). TLC R<sub>f</sub> = 0.32 in 10% EtOAc/CH<sub>2</sub>Cl<sub>2</sub>. <sup>1</sup>H NMR (300 MHz; CDCl<sub>3</sub>): δ 9.83 (s, 1H), 7.54 (d, *J* = 1.4 Hz, 1H), 6.76 (dd, *J* = 3.4, 0.5 Hz, 1H), 6.49 (dd, *J* = 3.4, 1.7 Hz, 1H), 5.91 (q, *J* = 1.2 Hz, 1H), 3.21 (s, 3H), 2.16 (s, 3H). <sup>13</sup>C NMR (100 MHz; CDCl<sub>3</sub>): δ 150.1 (C), 145.6 (CH), 140.8 (CH), 119.9 (C), 114.3 (CH), 111.8 (CH), 106.0 (CH), 29.9 (CH<sub>3</sub>), 9.9 (CH<sub>3</sub>). IR (film): 1695, 1653, 1558, 1433, 1398, 1265 cm<sup>-1</sup>. HRMS (EI): Exact mass calcd for C<sub>10</sub>H<sub>11</sub>N<sub>3</sub>O<sub>2</sub> [M]<sup>+</sup>: 205.0851. Found: 205.0866.

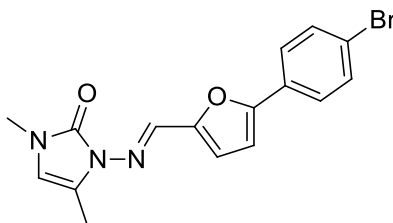

**(E)-3-(((5-(4-Bromophenyl)furan-2-yl)methylene)amino)-1,4-dimethyl-1H-imidazol-2(3H)-one (Table 2, 2h)** : Synthesized according to general procedure A using carbazone **1h**<sup>3</sup> (0.231 g, 0.600 mmol), *N*-methylpropargylamine (0.0460 g, 0.660 mmol), Et<sub>3</sub>N ( 0.0120 g, 0.120 mmol) and MeCN (2.0 mL) and heated at 100 °C for 6 hours. The crude mixture was purified by filtration and the pure compound was obtained as a light brown solid (0.175 g, 80 %). TLC R<sub>f</sub> = 0.41 in 10% EtOAc/CH<sub>2</sub>Cl<sub>2</sub>. <sup>1</sup>H NMR (300 MHz; DMSO-*d*<sub>6</sub>) δ 9.73 (s, 1H), 7.73-7.62 (m, 4H), 7.20-7.10 (m, 2H), 6.34 (s, 1H), 3.12 (s, 3H), 2.09 (s, 3H). <sup>13</sup>C NMR (100 MHz; DMSO-*d*<sub>6</sub>): δ

153.8 (C), 149.3 (C), 139.4 (CH), 131.9 (CH), 128.6 (C), 125.8 (CH), 121.3 (C), 118.3 (CH), 117.0 (C), 109.1 (CH), 107.1 (CH), 29.6 (CH<sub>3</sub>), 9.6 (CH<sub>3</sub>). IR (film): 1657, 1556, 1436, 1251, 1067, 1028 cm<sup>-1</sup>. HRMS (EI): Exact mass calcd for C<sub>16</sub>H<sub>14</sub>N<sub>3</sub>O<sub>2</sub>Br [M]<sup>+</sup>: 359.0269. Found: 359.0244.

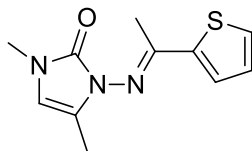

**(E)-1,4-Dimethyl-3-((1-(thiophen-2-yl)ethylidene)amino)-1H-imidazol-2(3H)-one (Table 2, 2i)** : Synthesized according to general procedure A using carbazone **1i**<sup>1</sup> (0.156 g, 0.600 mmol), *N*-methylpropargylamine (0.0460 g, 0.660 mmol), Et<sub>3</sub>N ( 0.0120 g, 0.120 mmol) and MeCN (2.0 mL) and heated at 100 °C for 6 hours. The crude mixture was purified by column chromatography using 40 % EtOAc/CH<sub>2</sub>Cl<sub>2</sub> and the pure compound was obtained as a yellow oil (0.120 g, 85 %). TLC R<sub>f</sub> = 0.16 in 40% EtOAc/CH<sub>2</sub>Cl<sub>2</sub>. <sup>1</sup>H NMR (300 MHz; CDCl<sub>3</sub>) δ 7.51 (dd, *J* = 3.7, 1.2 Hz, 1H), 7.42 (dd, *J* = 5.1, 1.1 Hz, 1H), 7.07 (dd, *J* = 5.1, 3.7 Hz, 1H), 5.97 (q, *J* = 1.3 Hz, 1H), 3.24 (s, 3H), 2.42 (s, 3H), 2.03 (d, *J* = 1.2 Hz, 3H). <sup>13</sup>C NMR (100 MHz; CDCl<sub>3</sub>): δ 165.6 (C), 142.2 (C), 129.9 (CH), 129.4 (CH), 127.3 (CH), 119.7 (C), 106.7 (CH), 30.4 (CH<sub>3</sub>), 17.6 (CH<sub>3</sub>), 10.0 (CH<sub>3</sub>). IR (film): 1695, 1670, 1652, 1553, 1431, 1396, 1265 cm<sup>-1</sup>. HRMS (EI): Exact mass calcd for C<sub>11</sub>H<sub>13</sub>N<sub>3</sub>OS [M]<sup>+</sup>: 235.0779. Found: 235.0803.

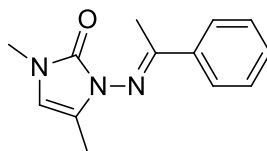

**(E)-1,4-Dimethyl-3-((1-phenylethylidene)amino)-1H-imidazol-2(3H)-one (Table 2, 2j)** : Synthesized according to general procedure A using carbazone **1j**<sup>1</sup> (0.153 g, 0.600 mmol), *N*-methylpropargylamine (0.0460 g, 0.660 mmol), Et<sub>3</sub>N ( 0.0120 g, 0.120 mmol) and MeCN (2.0 mL) and heated at 100 °C for 6 hours. The crude mixture was purified by column chromatography using 40 % EtOAc/CH<sub>2</sub>Cl<sub>2</sub> and the pure compound was obtained as a yellow oil (0.100 g, 73 %). TLC R<sub>f</sub> = 0.3 in 40% EtOAc/CH<sub>2</sub>Cl<sub>2</sub>. <sup>1</sup>H NMR (300 MHz; CDCl<sub>3</sub>) δ 7.96-7.90 (m, 2H), 7.47-7.34 (m, 3H), 5.98 (q, *J* = 1.3 Hz, 1H), 3.23 (s, 3H), 2.39 (s, 3H), 2.03 (d, *J* = 1.4 Hz, 3H). <sup>13</sup>C NMR (100 MHz; CDCl<sub>3</sub>): δ 170.9 (C), 148.3 (C), 137.1 (C), 130.5 (CH), 128.2 (CH), 127.2 (CH), 119.5 (C), 106.7 (CH), 30.3 (CH<sub>3</sub>), 17.6 (CH<sub>3</sub>), 10.0 (CH<sub>3</sub>). IR (film): 1680, 1558, 1506, 1433, 1398, 1385, 1355, 1265, 1180 cm<sup>-1</sup>. HRMS (EI): Exact mass calcd for C<sub>13</sub>H<sub>15</sub>N<sub>3</sub>O [M]<sup>+</sup>: 229.1215. Found: 229.1220.

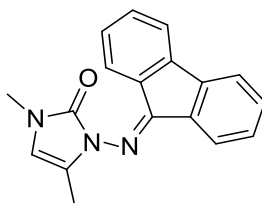

**3-((9H-Fluoren-9-ylidene)amino)-1,4-dimethyl-1H-imidazol-2(3H)-one (Table 2, 2k)** : Synthesized according to general procedure A using carbazone **1k**<sup>4</sup> (0.189 g, 0.600 mmol), *N*-methylpropargylamine (0.0460 g, 0.660 mmol), Et<sub>3</sub>N ( 0.0120 g, 0.120 mmol) and MeCN (2.0

mL) and heated at 100 °C for 6 hours. The crude mixture was purified by column chromatography using 20 % EtOAc/CH<sub>2</sub>Cl<sub>2</sub> and the pure compound was obtained as an orange solid (0.130 g, 75 %). TLC R<sub>f</sub> = 0.10 in 20% EtOAc/CH<sub>2</sub>Cl<sub>2</sub>. <sup>1</sup>H NMR (300 MHz; CDCl<sub>3</sub>) δ 7.51 (dd, *J* = 3.7, 1.2 Hz, 1H), 7.92 (d, *J* = 7.5, 1H), 7.59 (dd, *J* = 7.4, 4.0 Hz, 2H), 7.42 (qd, *J* = 7.7, 1.1 Hz, 2H), 7.36 (d, *J* = 7.6 Hz, 1H), 7.32-7.27 (m, 1H), 7.24-7.19 (m, 1H) 6.10 (q, *J* = 1.4 Hz, 1H), 3.31 (s, 3H), 2.08 (d, *J* = 1.2 Hz, 3H). <sup>13</sup>C NMR (100 MHz; CDCl<sub>3</sub>): δ 165.6 (C), 143.0 (C), 141.6 (C), 136.4 (C), 132.4 (CH), 131.9 (CH), 131.0 (C), 128.6 (CH), 128.2 (CH), 127.7 (CH), 123.6 (CH), 120.0 (CH), 119.8 (C), 119.7 (CH), 107.5 (CH), 30.6 (CH<sub>3</sub>), 17.6 (CH<sub>3</sub>), 10.2 (CH<sub>3</sub>). IR (film): 1686, 1678, 1605, 1589, 1450, 1431, 1379, 1340, 1180 cm<sup>-1</sup>. HRMS (EI): Exact mass calcd for C<sub>18</sub>H<sub>15</sub>N<sub>3</sub>O [M]<sup>+</sup>: 289.1215. Found: 289.1252.

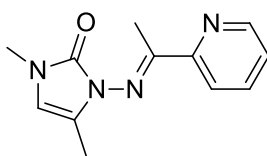

**(E)-1,4-Dimethyl-3-((1-(pyridin-2-yl)ethylidene)amino)-1H-imidazol-2(3H)-one (Table 2, 2l)** : Synthesized according to general procedure A using carbazone **1l**<sup>1</sup> (0.153 g, 0.600 mmol), *N*-methylpropylamine (0.0460 g, 0.660 mmol), Et<sub>3</sub>N ( 0.0120 g, 0.120 mmol) and MeCN (2.0 mL) and heated at 100 °C for 6 hours. The crude mixture was purified by column chromatography using 20 % EtOAc/CH<sub>2</sub>Cl<sub>2</sub> and the pure compound was obtained as a yellow oil (0.119 g, 86 %). TLC R<sub>f</sub> = 0.08 in 20% EtOAc/CH<sub>2</sub>Cl<sub>2</sub>. <sup>1</sup>H NMR (300 MHz; CDCl<sub>3</sub>) δ 8.65 (d, *J* = 4.2 Hz, 1H), 8.16 (d, *J* = 8.0 Hz, 1H), 7.72 (td, *J* = 7.7, 1.6 Hz, 1H), 7.33 (dd, *J* = 6.4, 5.0 Hz, 1H) 6.00 (d, *J* = 1.2 Hz, 1H), 3.25 (s, 3H), 2.53 (s, 3H), 2.03 (d, *J* = 0.9 Hz, 3H). <sup>13</sup>C NMR (100 MHz; CDCl<sub>3</sub>): δ 171.7 (C), 148.6 (CH), 136.2 (CH), 124.8 (CH), 122.0 (CH), 119.6 (C), 107.0 (CH), 30.4 (CH<sub>3</sub>), 16.6 (CH<sub>3</sub>), 10.0 (CH<sub>3</sub>). IR (film): 1701, 1690, 1670, 1636, 1560, 1543, 1499, 1472, 1263, 1082 cm<sup>-1</sup>. HRMS (EI): Exact mass calcd for C<sub>12</sub>H<sub>14</sub>N<sub>4</sub>O [M]<sup>+</sup>: 230.1168. Found: 230.1158.

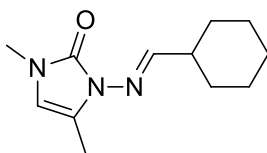

**(E)-3-((Cyclohexylmethylene)amino)-1,4-dimethyl-1H-imidazol-2(3H)-one (Table 2, 2m)** : Synthesized according to general procedure A using carbazone **1n**<sup>5</sup> (0.148 g, 0.600 mmol), *N*-methylpropylamine (0.0460 g, 0.660 mmol), Et<sub>3</sub>N ( 0.0120 g, 0.120 mmol) and MeCN (2.0 mL) and heated at 100 °C for 6 hours. The crude mixture was purified by column chromatography using 10 % EtOAc/CH<sub>2</sub>Cl<sub>2</sub> and the pure compound was obtained as a white solid (0.0900 g, 68 %). TLC R<sub>f</sub> = 0.31 in 10% EtOAc/CH<sub>2</sub>Cl<sub>2</sub>. <sup>1</sup>H NMR (300 MHz; CDCl<sub>3</sub>) δ

8.98 (d,  $J = 5.5$  Hz, 1H), 5.82 (q,  $J = 1.2$  Hz, 1H), 3.16 (s, 3H), 2.33-2.22 (m, 1H), 2.05 (d,  $J = 1.4$  Hz, 1H), 1.87-1.62 (m, 5H), 1.38-1.17 (m, 5H).  $^{13}\text{C}$  NMR (100 MHz;  $\text{CDCl}_3$ ):  $\delta$  161.3 (CH), 150.0 (C), 119.7 (C), 105.1 (CH), 41.8 ( $\text{CH}_3$ ), 29.9 ( $\text{CH}_2$ ), 29.7 (CH), 25.9 ( $\text{CH}_2$ ), 25.4 ( $\text{CH}_2$ ), 9.8 ( $\text{CH}_3$ ). IR (film): 1684, 1664, 1345, 1265, 1248  $\text{cm}^{-1}$ . HRMS (EI): Exact mass calcd for  $\text{C}_{12}\text{H}_{19}\text{N}_3\text{O}$   $[\text{M}]^+$ : 221.1528. Found: 221.1527.

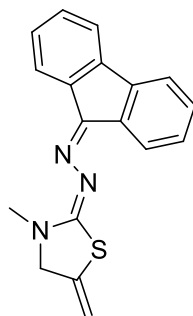

**(E)-2-((9H-Fluoren-9-ylidene)hydrazono)-3-methyl-5-methylenethiazolidine (Table 2, 2n)** : Synthesized according to general procedure A using thiosemicarbazone **1n**<sup>3</sup> (0.225 g, 0.600 mmol), *N*-methylpropragylamine (0.0460 g, 0.660 mmol),  $\text{Et}_3\text{N}$  (0.0120 g, 0.120 mmol) and MeCN (2.0 mL) and heated at 120 °C for 2 hours. The crude mixture was purified by column chromatography using 20 % EtOAc/Hexanes and the pure compound was obtained as a yellow solid (0.139 g, 76 %). TLC  $R_f = 0.12$  in 20% EtOAc/hexanes.  $^1\text{H}$  NMR (300 MHz;  $\text{CDCl}_3$ )  $\delta$  8.75-8.67 (m, 1H), 7.97-7.88 (m, 1H), 7.74-7.62 (m, 2H), 7.44-7.27 (m, 4H), 5.30-5.22 (m, 2H), 4.47-4.40 (m, 2H), 3.31-3.24 (m, 3H).  $^{13}\text{C}$  NMR (100 MHz;  $\text{CDCl}_3$ ):  $\delta$  141.3 (C), 140.1 (C), 137.7 (C), 132.0 (C), 129.7 (CH), 129.1 (CH), 129.0 (C), 127.6 (CH), 127.5 (CH), 121.7 (CH), 119.5 (CH), 119.5 (CH), 105.4 ( $\text{CH}_2$ ), 59.2 ( $\text{CH}_2$ ), 33.7 ( $\text{CH}_3$ ). IR (film): 1690, 1607, 1566, 1537, 1456, 1408, 1263  $\text{cm}^{-1}$ . HRMS (EI): Exact mass calcd for  $\text{C}_{18}\text{H}_{15}\text{N}_3\text{S}$   $[\text{M}]^+$ : 305.0987. Found: 305.1005.

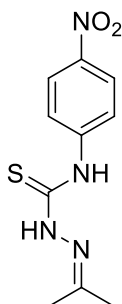

***N*-(4-Nitrophenyl)-2-(propan-2-ylidene)hydrazinecarbothioamide (Table 2, 1o)**: To a solution of Acetone (0.15 mL, 2.00 mmol) in MeOH (10.0 mL) was added *N*-(4-nitrophenyl)hydrazinecarbothioamide (0.425 g, 2.00 mmol) and the solution was stirred at reflux for 3 hours. Upon cooling, a solid precipitated and was collected by filtration to afford the desired product as a orange solid (0.250 g, 50 %). TLC  $R_f = 0.29$  in 10 % EtOAc/ $\text{CH}_2\text{Cl}_2$ .  $^1\text{H}$  NMR (400 MHz;  $\text{DMSO}-d_6$ )  $\delta$  10.75 (br s, 1H), 10.25 (br s, 1H), 8.20 (d,  $J = 9.0$  Hz, 2H), 8.07 (d,  $J = 9.2$  Hz, 2H), 2.04 (s, 3H), 2.00 (s, 3H).  $^{13}\text{C}$  NMR (100 MHz;  $\text{DMSO}-d_6$ ):  $\delta$  175.8 (C), 154.5 (C), 145.5 (C), 143.1 (C), 123.7 (CH), 123.5 (CH), 25.1 ( $\text{CH}_3$ ), 18.1 ( $\text{CH}_3$ ). IR (film): 1637,



1596, 1558, 1523, 1330, 1265  $\text{cm}^{-1}$ . HRMS (EI): Exact mass calcd for  $\text{C}_{10}\text{H}_{12}\text{N}_4\text{O}_2\text{S}$   $[\text{M}]^+$ : 252.0681. Found: 252.0694.

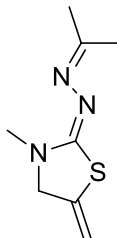

**(E)-3-Methyl-5-methylene-2-(propan-2-ylidenehydrazono)thiazolidine (Table 2, 2o)** : Synthesized according to general procedure A using thiosemicarbazone **1o** (0.0760 g, 0.300 mmol), *N*-methylpropylamine (0.0230 g, 0.330 mmol),  $\text{Et}_3\text{N}$  (0.00600 g, 0.120 mmol) and MeCN (1.0 mL) and heated at 120  $^\circ\text{C}$  for 2 hours. The crude mixture was purified by column chromatography using 20 % EtOAc/Hexanes and the pure compound was obtained as a yellow solid (0.0470 g, 85 %). TLC  $R_f$  = 0.24 in 20% EtOAc/hexanes.  $^1\text{H}$  NMR (300 MHz;  $\text{CDCl}_3$ )  $\delta$  5.18-5.13 (m, 2H), 4.23 (t,  $J$  = 2.3 Hz, 2H), 3.02 (s, 3H), 2.03 (s, 3H), 1.98 (s, 3H).  $^{13}\text{C}$  NMR (100 MHz;  $\text{CDCl}_3$ ):  $\delta$  164.4 (C), 159.8 (C), 138.7 (C), 104.6 ( $\text{CH}_2$ ), 58.7 ( $\text{CH}_2$ ), 33.3 ( $\text{CH}_3$ ), 24.7 ( $\text{CH}_3$ ), 18.1 ( $\text{CH}_3$ ). IR (film): 1679, 1638, 1593, 1466, 1389, 1263, 1068  $\text{cm}^{-1}$ . HRMS (EI): Exact mass calcd for  $\text{C}_8\text{H}_{13}\text{N}_3\text{S}$   $[\text{M}]^+$ : 183.0830. Found: 183.0835.

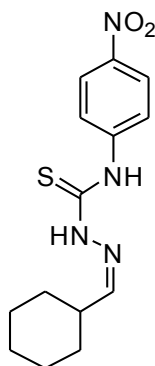

***N*-(4-Nitrophenyl)-2-(cyclohexylmethylene)hydrazinecarbothioamide (Table 2, 1p)**: To a solution of cyclohexane carboxaldehyde (0.225 g, 2.00 mmol) in MeOH (10.0 mL) was added *N*-(4-nitrophenyl)hydrazinecarbothioamide (0.425 g, 2.00 mmol) and the solution was stirred at reflux for 3 hours. Upon cooling, a solid precipitated and was collected by filtration to afford the desired product as a yellow solid (0.375 g, 61 %). TLC  $R_f$  = 0.36 in 10 % EtOAc/ $\text{CH}_2\text{Cl}_2$ .  $^1\text{H}$  NMR (400 MHz;  $\text{DMSO}-d_6$ )  $\delta$  8.25-8.14 (m, 3H), 8.05-8.02 (m, 2H), 7.45 (d,  $J$  = 5.7 Hz, 1H), 2.32-2.23 (m, 1H), 1.84-1.61 (m, 5H), 1.34-1.16 (m, 5H).  $^{13}\text{C}$  NMR (100 MHz;  $\text{DMSO}-d_6$ ):  $\delta$  175.0 (C), 152.8 (CH), 145.4 (C), 143.2 (C), 123.7 (CH), 40.1 (CH), 29.5 ( $\text{CH}_2$ ), 25.4 ( $\text{CH}_2$ ), 25.0 ( $\text{CH}_2$ ). IR (film): 2941, 1641, 1585, 1552, 1450, 1332, 1265  $\text{cm}^{-1}$ . HRMS (EI): Exact mass calcd for  $\text{C}_{14}\text{H}_{18}\text{N}_4\text{O}_2\text{S}$   $[\text{M}]^+$ : 306.1150. Found: 306.1197.

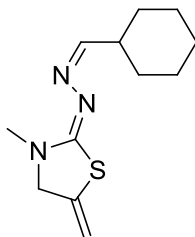

**(E)-2-((Z)-(Cyclohexylmethylene)hydrazono)-3-methyl-5-methylenethiazolidine (Table 2, 2p)** : Synthesized according to general procedure A using thiosemicarbazone **1p** (0.0920 g, 0.300 mmol), *N*-methylpropargylamine (0.0230 g, 0.330 mmol), Et<sub>3</sub>N ( 0.00600 g, 0.120 mmol) and MeCN (1.0 mL) and heated at 120 °C for 2 hours. The crude mixture was purified by column chromatography using 20 % EtOAc/Hexanes and the pure compound was obtained as a yellow oil (0.0430 g, 60 %). TLC R<sub>f</sub> = 0.30 in 20% EtOAc/hexanes. <sup>1</sup>H NMR (300 MHz; CDCl<sub>3</sub>) δ 7.59 (d, *J* = 5.8 Hz, 1H), 5.20-5.14 (m, 2H), 4.27 (t, *J* = 2.3 Hz, 2H), 3.02 (s, 3H), 2.33-2.22 (m, 1H), 1.89-1.63 (m, 5H), 1.38-1.17 (m, 5H). <sup>13</sup>C NMR (100 MHz; CDCl<sub>3</sub>): δ 166.5 (C), 160.7 (CH), 138.3 (C), 104.7 (CH<sub>2</sub>), 58.9 (CH<sub>2</sub>), 40.7 (CH), 33.3 (CH<sub>3</sub>), 30.2 (CH<sub>2</sub>), 26.0 (CH<sub>2</sub>), 25.4 (CH<sub>2</sub>). IR (film): 2910, 1639, 1585, 1423, 1392, 1265, 951 cm<sup>-1</sup>. HRMS (EI): Exact mass calcd for C<sub>12</sub>H<sub>19</sub>N<sub>3</sub>S [M]<sup>+</sup>: 237.1300. Found: 237.1329.

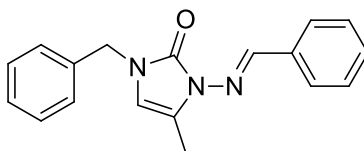

**(E)-1-Benzyl-3-(benzylideneamino)-4-methyl-1H-imidazol-2(3H)-one (Table 3, 3a)**: Synthesized according to general procedure A using carbazone **1a** (0.146 g, 0.600 mmol), *n*-benzyl propargylamine (0.960 g, 0.660 mmol), Et<sub>3</sub>N ( 0.0120 g, 0.120 mmol) and MeCN (2.0 mL) and heated at 100 °C for 6 hours. The crude mixture was purified by column chromatography using 5 % EtOAc/CH<sub>2</sub>Cl<sub>2</sub> and the pure compound was obtained as a off white solide (0.148 g, 85 %). TLC R<sub>f</sub> = 0.3 in 5% EtOAc/CH<sub>2</sub>Cl<sub>2</sub>. <sup>1</sup>H NMR (300 MHz; CDCl<sub>3</sub>) δ 9.98 (s, 1H), 7.81-7.78 (m, 2H), 7.45-7.30 (m, 8H), 5.90 (d, *J* = 1.2 Hz, 1H), 4.79 (s, 2H), 2.18 (d, *J* = 1.0 Hz, 3H). <sup>13</sup>C NMR (100 MHz; CDCl<sub>3</sub>): δ 151.2 (CH), 149.8 (C), 136.7 (C), 135.1 (C), 130.2 (CH), 128.7 (CH), 128.6 (CH), 127.8 (CH), 127.8 (CH), 120.4 (C), 104.6 (CH), 46.7 (CH<sub>2</sub>), 10.0 (CH<sub>3</sub>). IR (film): 2953, 2853, 1679, 1647, 1456, 1398, 1362, 1327, 1258 cm<sup>-1</sup>. HRMS (EI): Exact mass calcd for C<sub>18</sub>H<sub>17</sub>N<sub>3</sub>O [M]<sup>+</sup>: 291.1372. Found: 291.1387.

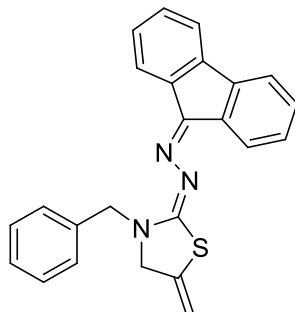

**(E)-2-((9H-Fluoren-9-ylidene)hydrazono)-3-benzyl-5-methylenethiazolidine (Table 3, 4a)** : Synthesized according to general procedure A using thiosemicarbazone X (0.225 g, 0.600 mmol), *n*-benzyl propargylamine (0.0960 g, 0.660 mmol), Et<sub>3</sub>N ( 0.0120 g, 0.120 mmol) and MeCN (2.0 mL) and heated at 120 °C for 2 hours. The crude mixture was purified by filtration and the pure compound was obtained as a yellow solid (0.155g, 68 %). TLC R<sub>f</sub> = 0.27 in 40% CH<sub>2</sub>Cl<sub>2</sub>/hexanes. <sup>1</sup>H NMR (300 MHz; CDCl<sub>3</sub>) δ 8.64 (dt, *J* = 7.6, 0.6 Hz, 1H), 7.91-7.88 (m, 1H), 7.69-7.61 (m, 2H), 7.42-7.27 (m, 4H), 5.25-5.22 (m, 2H), 4.54 (t, *J* = 2.3 Hz, 2H), 3.93 (t, *J* = 6.6 Hz, 2H), 2.80 (t, *J* = 6.6 Hz, 2H), 1.48 (s, 9H). <sup>13</sup>C NMR (100 MHz; CDCl<sub>3</sub>): δ 171.0 (C), 169.9 (C), 153.1 (C), 141.4 (C), 140.1 (C), 137.7 (C), 131.9 (C), 129.7 (CH), 129.2 (CH), 128.8 (CH), 127.6 (CH), 127.5 (CH), 121.7 (CH), 119.5 (CH), 119.4 (CH), 105.4 (CH<sub>2</sub>), 81.1 (C), 58.0 (CH<sub>2</sub>), 43.0 (CH<sub>2</sub>), 33.0 (CH<sub>2</sub>), 28.0 (CH<sub>3</sub>) . IR (film): 1684, 1647, 1554, 1506, 1107, 903 cm<sup>-1</sup>. HRMS (EI): Exact mass calcd for C<sub>24</sub>H<sub>19</sub>N<sub>3</sub>S [M]<sup>+</sup>: 381.1300. Found: 381.1321.

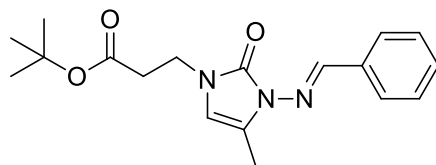

**(E)-tert-Butyl 3-(3-(benzylideneamino)-4-methyl-2-oxo-2,3-dihydro-1H-imidazol-1-yl)propanoate (Table 3, 3b)** : Synthesized according to general procedure A using carbazone **1a** (0.146 g, 0.600 mmol), the propargylic amine<sup>7</sup> (0.121 g, 0.660 mmol), Et<sub>3</sub>N ( 0.0120 g, 0.120 mmol) and MeCN (2.0 mL) and heated at 100 °C for 6 hours. The crude mixture was purified by column chromatography using a gradient of CH<sub>2</sub>Cl<sub>2</sub> to 5 % EtOAc/CH<sub>2</sub>Cl<sub>2</sub> and the pure compound was obtained as a yellow oil (0.140 g, 71 %). TLC R<sub>f</sub> = 0.47 in 5% EtOAc/CH<sub>2</sub>Cl<sub>2</sub>. <sup>1</sup>H NMR (300 MHz; CDCl<sub>3</sub>) δ 9.91 (s, 1H), 7.79-7.73 (m, 2H), 7.42-7.37 (m, 3H), 6.02 (d, *J* = 1.2 Hz, 1H), 3.85 (t, *J* = 6.6 Hz, 2H), 2.62 (t, *J* = 6.6 Hz, 2H), 2.17 (d, *J* = 1.2 Hz, 3H), 1.45 (s, 9H) . <sup>13</sup>C NMR (100 MHz; CDCl<sub>3</sub>): δ 170.6 (C), 151.2 (CH), 135.1 (C), 130.2 (CH), 128.6 (CH), 127.3 (CH), 119.9 (C), 105.4 (CH), 81.1 (CH), 39.2 (CH<sub>2</sub>), 35.2 (CH<sub>2</sub>), 28.0 (CH<sub>3</sub>), 9.9 (CH<sub>3</sub>). IR (film): 1718, 1687, 1555, 1506, 1418, 1263 cm<sup>-1</sup>. HRMS (EI): Exact mass calcd for C<sub>18</sub>H<sub>23</sub>N<sub>3</sub>O<sub>3</sub> [M]<sup>+</sup>: 329.1739. Found: 329.1710.

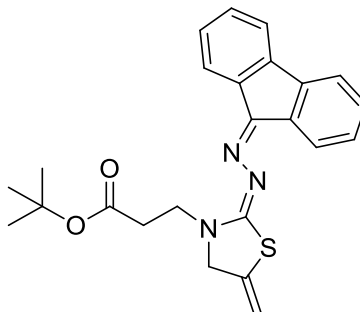

**(E)- tert-Butyl 3-(2-((9H-fluoren-9-ylidene)hydrazono)-5-methylenethiazolidin-3-yl)propanoate (Table 3, 4b)** : Synthesized according to general procedure A using thiosemicarbazone **1o** (0.225 g, 0.600 mmol), the propargylic amine<sup>7</sup> (0.121 g, 0.660 mmol), Et<sub>3</sub>N ( 0.0120 g, 0.120 mmol) and MeCN (2.0 mL) and heated at 120 °C for 2 hours. The crude mixture was purified by column chromatography using 20 % EtOAc/Hexanes and the pure compound was obtained as a orange foam (0.200 g, 79 %). TLC R<sub>f</sub> = 0.27 in 20% EtOAc/hexanes. <sup>1</sup>H NMR (300 MHz; CDCl<sub>3</sub>) δ 8.64 (dt, *J* = 7.6, 0.6 Hz, 1H), 7.91-7.88 (m, 1H), 7.69-7.61 (m, 2H), 7.42-7.27 (m, 4H), 5.25-5.22 (m, 2H), 4.54 (t, *J* = 2.3 Hz, 2H), 3.93 (t, *J* = 6.6 Hz, 2H), 2.80 (t, *J* = 6.6 Hz, 2H), 1.48 (s, 9H) . <sup>13</sup>C NMR (100 MHz; CDCl<sub>3</sub>): δ 171.0 (C), 169.9 (C), 153.1 (C), 141.4 (C), 140.1 (C), 137.7 (C), 131.9 (C), 129.7 (CH), 129.2 (CH), 128.8 (CH), 127.6 (CH), 127.5 (CH), 121.7 (CH), 119.5 (CH), 119.4 (CH), 105.4 (CH<sub>2</sub>), 81.1 (C), 58.0 (CH<sub>2</sub>), 43.0 (CH<sub>2</sub>), 33.0 (CH<sub>2</sub>), 28.0 (CH<sub>3</sub>) . IR (film): 1676, 1601, 1558, 1526, 1501, 1431, 1420, 1398, 1263 cm<sup>-1</sup>. HRMS (EI): Exact mass calcd for C<sub>24</sub>H<sub>25</sub>N<sub>3</sub>O<sub>2</sub>S [M]<sup>+</sup>: 419.1667. Found: 419.1666.

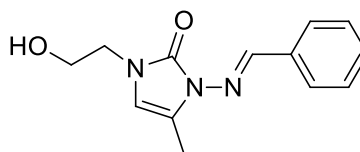

**(E)-3-(Benzylideneamino)-1-(2-hydroxyethyl)-4-methyl-1H-imidazol-2(3H)-one (Table 3, 3c)** : Synthesized according to general procedure A using carbazone **1a** (0.146 g, 0.600 mmol), ethanolpropagylamine<sup>8</sup> (0.0650 g, 0.660 mmol), Et<sub>3</sub>N ( 0.0120 g, 0.120 mmol) and MeCN (2.0 mL) and heated at 120 °C for 6 hours. After trying multiple purification methods and different reaction conditions that did not increase the yield or the purity of the obtained compound, a NMR yield was determined using ratio of phenol to the desired compound : 49-51 %

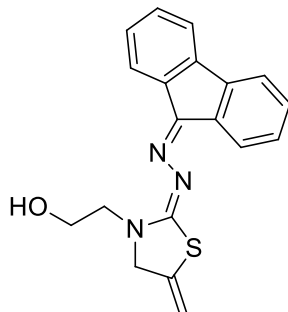

**(E)-2-(2-((9H-Fluoren-9-ylidene)hydrazono)-5-methylenethiazolidin-3-yl)ethanol (Table 3, 4c)** : Synthesized according to general procedure A using thiosemicarbazone **1p** (0.225 g, 0.600 mmol), ethanolpropargylamine<sup>8</sup> (0.0650 g, 0.660 mmol), Et<sub>3</sub>N ( 0.0120 g, 0.120 mmol) and MeCN (2.0 mL) and heated at 120 °C for 2 hours. The crude mixture was purified by column chromatography using 100 % EtOAc and the pure compound was obtained as a yellow solid (0.147 g, 73 %). TLC Rf = 0.20 in 100% EtOAc. <sup>1</sup>H NMR (300 MHz; CDCl<sub>3</sub>) δ 8.55 (d, *J* = 7.4 Hz, 1H), 7.87 (d, *J* = 7.4 Hz, 1H), 7.66 (d, *J* = 7.4 Hz, 1H), 7.62 (d, *J* = 7.4 Hz, 1H), 7.40-7.29 (m, 4H), 5.25-5.20 (m, 2H), 4.55 (t, *J* = 2.2 Hz, 2H), 4.00 (t, *J* = 4.9 Hz, 2H), 3.84-3.82 (m, 2H) . <sup>13</sup>C NMR (100 MHz; CDCl<sub>3</sub>): δ 171.8 (C), 153.0 (C), 153.1 (C), 141.5 (C), 140.1 (C), 137.6 (C), 137.5 (C), 131.7 (C), 129.9 (CH), 129.3 (CH), 128.5 (CH), 127.8 (CH), 127.5 (CH), 121.7 (CH), 119.6 (CH), 119.5 (CH), 106.4 (CH<sub>2</sub>), 61.3 (CH<sub>2</sub>), 58.8 (CH<sub>2</sub>), 49.8 (CH<sub>2</sub>). IR (film): 2960, 2853, 1535, 1495, 1416, 1265, 1141 cm<sup>-1</sup>. HRMS (EI): Exact mass calcd for C<sub>24</sub>H<sub>17</sub>N<sub>3</sub>OS [M]<sup>+</sup>: 335.1092. Found: 335.1100.

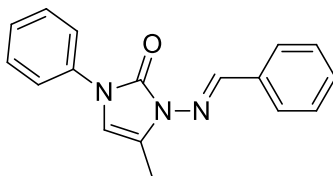

**(E)-3-(Benzylideneamino)-4-methyl-1-phenyl-1H-imidazol-2(3H)-one (Table 3, 3d)** : Synthesized according to general procedure A using carbazone **1a** (0.146 g, 0.600 mmol), *n*-phenylpropargylamine (0.0870 g, 0.660 mmol), Et<sub>3</sub>N ( 0.0120 g, 0.120 mmol) and MeCN (2.0 mL) and heated at 100 °C for 6 hours. The crude mixture was purified by Et<sub>3</sub>N treated<sup>b</sup> column chromatography using 25 % hexanes/CH<sub>2</sub>Cl<sub>2</sub> and the pure compound was obtained as a yellow solid (0.0900 g, 54 %). TLC Rf = 0.25 in 25% hexanes/CH<sub>2</sub>Cl<sub>2</sub>. <sup>1</sup>H NMR (300 MHz; CDCl<sub>3</sub>) δ 9.98 (s, 1H), 7.84-7.77 (m, 2H), 7.63-7.58 (m, 2H), 7.48-7.40 (m, 5H), 7.29-7.23 (m, 1H), 6.37 (q, *J* = 1.3 Hz, 1H), 2.18 (d, *J* = 1.4 Hz, 3H) . <sup>13</sup>C NMR (100 MHz; CDCl<sub>3</sub>): δ 151.8 (C), 135.0 (C), 130.4 (C), 129.2 (CH), 128.6 (CH), 127.5 (CH), 125.8 (CH), 121.7 (C), 121.6 (CH), 104.2 (CH), 10.1 (CH<sub>3</sub>). IR (film): 1693, 1684, 1506, 1398, 1376, 1265 cm<sup>-1</sup>. HRMS (EI): Exact mass calcd for C<sub>17</sub>H<sub>15</sub>N<sub>3</sub>O [M]<sup>+</sup>: 277.1215. Found: 227.1228.

<sup>b</sup> Et<sub>3</sub>N is crucial for separating product from phenol. Every solvent system without the use of Et<sub>3</sub>N resulted in poor to no separation of the two compounds.

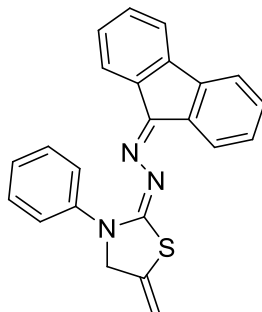

**(E)-2-((9H-Fluoren-9-ylidene)hydrazono)-5-methylene-3-phenylthiazolidine (Table 3, 4d)** : Synthesized according to general procedure A using thiosemicarbazone **1p** (0.225 g, 0.600 mmol), *n*-phenylpropargylamine (0.0870 g, 0.660 mmol), Et<sub>3</sub>N ( 0.0120 g, 0.120 mmol) and MeCN (2.0 mL) and heated at 120 °C for 2 hours. The crude mixture was purified filtration and the pure compound was obtained as a orange solid (0.170 g, 78 %). TLC R<sub>f</sub> = 0.12 in 20% EtOAc/hexanes. <sup>1</sup>H NMR (300 MHz; DMSO-*d*<sub>6</sub>) δ 8.34 (d, *J* = 7.6, 1H), 7.84-7.72 (m, 5H), 7.54 (t, *J* = 8.0 Hz, 2H), 7.45-7.30 (m, 4H), 7.22-7.19 (m, 1H), 5.43 (d, *J* = 15.1 Hz, 2H), 5.11 (s, 2H). <sup>13</sup>C NMR (100 MHz; DMSO-*d*<sub>6</sub>): δ 169.0 (C), 152.8 (C), 140.6 (C), 139.7 (C), 136.5 (C), 135.8 (C), 130.6 (CH), 130.6 (C), 129.9 (CH), 128.9 (CH), 127.9 (CH), 125.7 (CH), 123.3 (CH), 121.2 (CH), 120.3 (CH), 120.3 (CH), 106.4 (CH<sub>2</sub>), 58.8 (CH<sub>2</sub>). IR (film): 1684, 1647, 1555, 1506, 1107 cm<sup>-1</sup>. HRMS (EI): Exact mass calcd for C<sub>23</sub>H<sub>17</sub>N<sub>3</sub>S [M]<sup>+</sup>: 367.1143. Found: 367.1438.

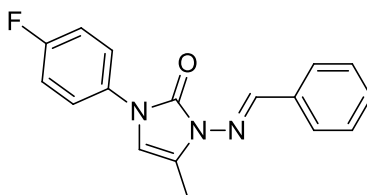

**(E)-3-(Benzylideneamino)-1-(4-fluorophenyl)-4-methyl-1H-imidazol-2(3H)-one (Table 3, 3e)** : Synthesized according to general procedure A using carbazone **1a** (0.146 g, 0.600 mmol), 4-fluoro-*n*-propargylaniline<sup>9</sup> (0.0980 g, 0.660 mmol), Et<sub>3</sub>N ( 0.0120 g, 0.120 mmol) and MeCN (2.0 mL) and heated at 100 °C for 6 hours. The crude mixture was purified column chromatography using 6% EtOAc/Hexane and the pure compound was obtained as a yellow solid (0.0660 g, 37 %). TLC R<sub>f</sub> = 0.25 in 6% EtOAc/Hexane. <sup>1</sup>H NMR (300 MHz; CDCl<sub>3</sub>) δ 9.95 (s, 1H), 7.81-7.78 (m, 2H), 7.57-7.53 (m, 2H), 7.44-7.41 (m, 3H), 7.15-7.09 (m, 2H), 6.29 (q, *J* = 1.2 Hz, 1H), 2.26 (d, *J* = 1.6 Hz, 3H). <sup>13</sup>C NMR (100 MHz; CDCl<sub>3</sub>): δ 161.7 (C), 159.3 (C), 152.0 (CH), 148.6 (C), 135.0 (C), 133.0 (133.0 fluorine coupling) (C), 130.5 (CH), 128.7 (CH), 127.5 (CH), 123.6 (CH), 123.5 (CH), 121.8 (C), 116.1 (CH), 115.9 (CH), 10.1 (CH<sub>3</sub>). IR (film): 2954, 2841, 1690, 1678, 1558, 1512, 1400, 1377, 1263 cm<sup>-1</sup>. HRMS (EI): Exact mass calcd for C<sub>17</sub>H<sub>14</sub>N<sub>3</sub>O [M]<sup>+</sup>: 295.1121. Found: 295.1164.

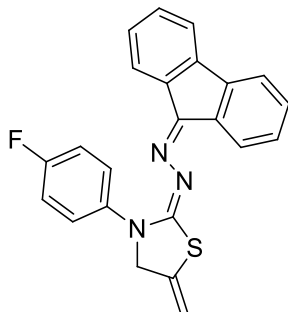

**(E)-2-((9H-Fluoren-9-ylidene)hydrazono)-3-(4-fluorophenyl)-5-methylenethiazolidine**

**(Table 3, 4e)** : Synthesized according to general procedure A using thiosemicarbazone **1p** (0.225 g, 0.600 mmol), 4-fluoro-*n*-propargylaniline<sup>9</sup> (0.0980 g, 0.660 mmol), Et<sub>3</sub>N ( 0.0120 g, 0.120 mmol) and MeCN (2.0 mL) and heated at 120 °C for 2 hours. The crude mixture was purified filtration and the pure compound was obtained as an orange solid (0.180 g, 78 %). TLC R<sub>f</sub> = 0.11 in 20% EtOAc/hexanes. <sup>1</sup>H NMR (300 MHz; DMSO-*d*<sub>6</sub>) δ 8.26 (d, *J* = 7.6, 1H), 7.83-7.71 (m, 5H), 7.45-7.31 (m, 5H), 7.24-7.19 (m, 1H), 5.42 (d, *J* = 12.2 Hz, 2H), 5.08 (s, 2H). <sup>13</sup>C NMR (100 MHz; DMSO-*d*<sub>6</sub>): δ 168.6 (C), 152.8 (C), 140.3 (C), 139.4 (C), 136.3 (C), 135.7 (C), 130.4 (CH), 130.0 (CH), 129.4 (CH), 127.7 (CH), 127.4 (CH) 127.3 (CH), 125.5 (CH), 125.4 (CH), 120.8 (CH), 119.6 (CH), 119.6 (CH), 115.3 (CH), 115.0 (CH), 105.8 (CH<sub>2</sub>), 58.6 (CH<sub>2</sub>). IR (film): 1690, 1670, 1609, 1595, 1526, 1506, 1477, 1433, 1398 cm<sup>-1</sup>. HRMS (EI): Exact mass calcd for C<sub>23</sub>H<sub>16</sub>N<sub>3</sub>SF [M]<sup>+</sup>: 385.1049. Found: 385.1015.

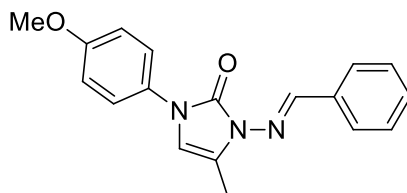

**(E)-3-(Benzylideneamino)-1-(4-methoxyphenyl)-4-methyl-1H-imidazol-2(3H)-one (Table 3, 3f)** : Synthesized according to general procedure A using carbazone **1a** (0.146 g, 0.600 mmol), 4-methoxy-*n*-propargylaniline<sup>9</sup> (0.106g, 0.660 mmol), Et<sub>3</sub>N (0.0120 g, 0.120 mmol) and MeCN (2.0 mL) and heated at 100 °C for 6 hours. The crude mixture was purified by filtration and the pure compound was obtained as a off white solid (0.0760 g, 41 %). TLC R<sub>f</sub> = 0.20 in 50% hexanes/CH<sub>2</sub>Cl<sub>2</sub>. <sup>1</sup>H NMR (300 MHz; CDCl<sub>3</sub>) δ 9.98 (s, 1H), 7.81-7.78 (m, 2H), 7.50-7.46 (m, 1H), 7.44-7.41 (m, 3H), 6.98-6.94 (m, 2H), 6.28 (q, *J* = 1.4 Hz, 1H), 3.83 (s, 3H), 2.26 (d, *J* = 1.2 Hz, 3H). <sup>13</sup>C NMR (100 MHz; CDCl<sub>3</sub>): δ 157.6 (C), 151.6 (CH), 148.7 (C), 135.0 (C), 130.3 (CH), 130.0 (C), 128.6 (CH), 127.4 (CH), 123.5 (CH), 121.1 (C), 114.3 (CH), 104.7 (CH), 55.5 (CH<sub>3</sub>), 10.0 (CH<sub>3</sub>). IR (film): 2960, 2849, 1684, 1653, 1555, 1520, 1506, 1397, 1255, 1251 cm<sup>-1</sup>. HRMS (EI): Exact mass calcd for C<sub>18</sub>H<sub>17</sub>N<sub>3</sub>O<sub>2</sub> [M]<sup>+</sup>: 307.13208. Found: 307.13229

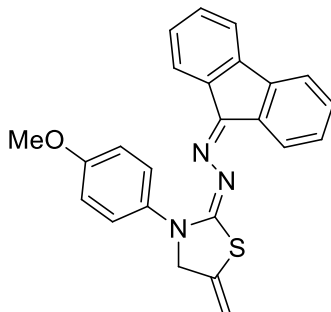

**(E)-2-((9H-Fluoren-9-ylidene)hydrazono)-3-(4-methoxyphenyl)-5-methylenethiazolidine**

**(Table 3, 4f)** : Synthesized according to general procedure A using thiosemicarbazone **1p** (0.225 g, 0.600 mmol), 4-methoxy-*n*-propargylaniline<sup>9</sup> (0.106 g, 0.660 mmol), Et<sub>3</sub>N (0.0120 g, 0.120 mmol) and MeCN (2.0 mL) and heated at 120 °C for 2 hours. The crude mixture was purified by filtration and the pure compound was obtained as a brown solid (0.170 g, 78 %). TLC R<sub>f</sub> = 0.3 in 20% EtOAc/hexanes. <sup>1</sup>H NMR (300 MHz; CDCl<sub>3</sub>) δ 8.38 (dt, *J* = 7.6, 0.9 Hz, 1H), 7.90 (dq, *J* = 7.4, 0.7 Hz, 1H), 7.63-7.57 (m, 4H), 7.38-7.27 (m, 3H), 7.15 (td, *J* = 7.6, 1.1 Hz, 1H), 7.03-6.99 (m, 2H), 5.31 (dq, *J* = 11.1, 2.1 Hz, 2H), 4.87 (t, *J* = 2.3 Hz, 2H), 3.89 (s, 3H). <sup>13</sup>C NMR (100 MHz; CDCl<sub>3</sub>): δ 168.9 (C), 157.3 (C), 154.2 (C), 144.3 (C), 140.4 (C), 137.5 (C), 136.8 (C), 133.2 (C), 131.7 (C), 130.0 (CH), 129.4 (CH), 128.7 (CH), 127.7 (CH), 127.5 (CH), 125.0 (CH), 121.9 (CH), 119.5 (CH), 119.5 (CH), 114.1 (C), 105.6 (CH<sub>2</sub>), 59.4 (CH<sub>2</sub>), 55.6 (CH<sub>3</sub>). IR (film): 2968, 2854, 1734, 1555, 1497, 1246, 1022 cm<sup>-1</sup>. HRMS (EI): Exact mass calcd for C<sub>24</sub>H<sub>19</sub>N<sub>3</sub>OS [M]<sup>+</sup>: 397.1249. Found: 397.1224.

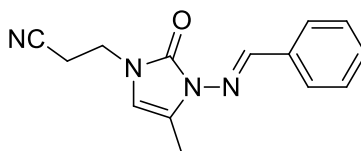

**(E)-3-(3-(Benzylideneamino)-4-methyl-2-oxo-2,3-dihydro-1H-imidazol-1-yl)propanenitrile**

**(Table 3, 3g)** : Synthesized according to general procedure A using carbazone **1a** (0.146 g, 0.600 mmol), the propargylic amine<sup>10</sup> (0.0710 g, 0.660 mmol), Et<sub>3</sub>N (0.0120 g, 0.120 mmol) and MeCN (2.0 mL) and heated at 120 °C for 6 hours. The crude mixture was purified by column chromatography using 6 % EtOAc/CH<sub>2</sub>Cl<sub>2</sub> and the pure compound was obtained as a white solid (0.0920 g, 60 %). TLC R<sub>f</sub> = 0.40 in 6% EtOAc/CH<sub>2</sub>Cl<sub>2</sub>. <sup>1</sup>H NMR (300 MHz; CDCl<sub>3</sub>) δ 9.84 (s, 1H), 7.79-7.73 (m, 2H), 7.44-7.39 (m, 3H), 6.07 (d, *J* = 1.4 Hz, 1H), 3.88 (t, *J* = 6.4 Hz, 2H), 2.74 (t, *J* = 6.5 Hz, 2H), 2.18 (d, *J* = 1.2 Hz, 3H). <sup>13</sup>C NMR (100 MHz; CDCl<sub>3</sub>): δ 151.8 (CH), 149.3 (C), 134.7 (C), 130.4 (CH), 128.6 (CH), 127.4 (CH), 121.0 (C), 117.4 (C), 104.7 (CH), 39.4 (CH<sub>2</sub>), 18.0 (CH<sub>2</sub>), 9.9 (CH<sub>3</sub>). IR (film): 2360, 1730, 1701, 1553, 1433, 1398, 1265 cm<sup>-1</sup>. HRMS (EI): Exact mass calcd for C<sub>14</sub>H<sub>14</sub>N<sub>4</sub>O [M]<sup>+</sup>: 254.1168. Found: 254.1155.



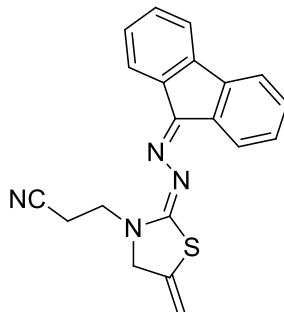

**(E)-3-(2-((9H-Fluoren-9-ylidene)hydrazono)-5-methylenethiazolidin-3-yl)propanenitrile (Table 3, 4g)** : Synthesized according to general procedure A using thiosemicarbazone **1p**<sup>c</sup> (0.225 g, 0.600 mmol), the propargylic amine<sup>10</sup> (0.0710 g, 0.660 mmol), Et<sub>3</sub>N (0.0120 g, 0.120 mmol) and MeCN (2.0 mL) and heated at 120 °C for 2 hours. The crude mixture was purified by column chromatography using 20 % EtOAc/Hexanes and the pure compound was obtained as a orange solid (0.152 g, 74 %). TLC R<sub>f</sub> = 0.27 in 20% EtOAc/hexanes. <sup>1</sup>H NMR (300 MHz; DMSO-*d*<sub>6</sub>) δ 8.59 (d, *J* = 7.2 Hz, 1H), 7.84 (dd, *J* = 12.6, 7.3 Hz, 2H), 7.71 (d, *J* = 7.0 Hz, 1H), 7.49-7.30 (m, 4H), 5.39 (d, *J* = 12.3 Hz, 2H), 4.69-4.68 (m, 2H), 3.98 (t, *J* = 6.6 Hz, 2H), 3.06 (t, *J* = 6.6 Hz, 2H). <sup>13</sup>C NMR (100 MHz; DMSO- *d*<sub>6</sub>): δ 170.2 (C), 151.8 (C), 140.6 (C), 139.5 (C), 136.7 (C), 136.6 (C), 131.0 (CH), 130.4 (CH), 129.7 (C), 128.6 (CH), 128.1 (CH), 127.8 (CH), 121.0 (CH), 120.2 (CH), 120.2 (CH), 119.1 (C), 106.6 (CH<sub>2</sub>), 60.0 (CH<sub>2</sub>), 42.4 (CH<sub>2</sub>), 33.0 (CH<sub>2</sub>), 15.1 (CH<sub>2</sub>). IR (film): 2314, 1684, 1601, 1458. 1420, 1398 cm<sup>-1</sup>. HRMS (EI): Exact mass calcd for C<sub>20</sub>H<sub>16</sub>N<sub>4</sub>S [M]<sup>+</sup>: 344.1096. Found: 344.1126.

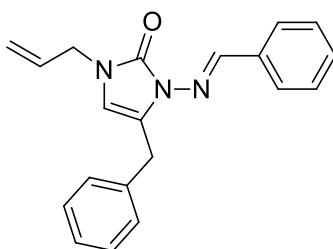

**(E)-1-Allyl-4-benzyl-3-(benzylideneamino)-1H-imidazol-2(3H)-one (Table 3, 3h)**: Synthesized according to general procedure A using carbazone **1a** (0.146 g, 0.600 mmol), the propargylic amine<sup>11</sup> (0.113 g, 0.660 mmol), Et<sub>3</sub>N (0.0120 g, 0.120 mmol) and MeCN (2.0 mL) and heated at 100 °C for 6 hours. Purifications were unsuccessful (product seems to degrade and equilibrate threw isomerization), therefore another reaction was performed and 0.0114 g of 1,3,5-trimethoxybenzene was added as NMR internal standard. 35 % of desired product (endocyclic alkene) was observed with 14 % of the exocyclic present.

<sup>c</sup> *O*-Nitroaniline was used as leaving group to ensure good separation for the flash chromatography. For synthesis see: Lavergne, K.; MSc thesis, University of Ottawa, 2015

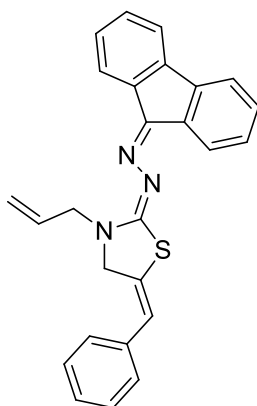

**(2E,5E)-2-((9H-Fluoren-9-ylidene)hydrazono)-3-allyl-5-benzylidenethiazolidine (Table 3, 4h)** : Synthesized according to general procedure A using thiosemicarbazone **1p** (0.225 g, 0.600 mmol), the propargylic amine<sup>11</sup> (0.113 g, 0.660 mmol), Et<sub>3</sub>N (0.0120 g, 0.120 mmol) and MeCN (2.0 mL) and heated at 120 °C for 2 hours. The crude mixture was purified filtration and the pure compound was obtained as an orange solid (0.223 g, 91 %). TLC R<sub>f</sub> = 0.13 in 20% EtOAc/hexanes. <sup>1</sup>H NMR (300 MHz; CDCl<sub>3</sub>) δ 8.69 (d, *J* = 7.3, 1H), 7.99 (d, *J* = 7.0 Hz, 1H), 7.66 (dd, *J* = 11.8, 7.3 Hz, 2H), 7.46-7.27 (m, 9H), 7.22-7.19 (m, 1H), 6.55 (s, 1H), 6.00 (ddt, *J* = 16.9, 10.4, 6.2 Hz, 1H), 5.41-5.32 (m, 2H), 4.58 (d, *J* = 1.7 Hz, 2H), 4.35 (d, *J* = 6.1 Hz, 2H). <sup>13</sup>C NMR (100 MHz; CDCl<sub>3</sub>): δ 169.3 (C), 141.4 (C), 140.2 (C), 137.6 (C), 135.9 (C), 131.9 (C), 131.5 (CH), 129.9 (CH), 129.3 (CH), 129.1 (C), 129.0 (CH), 128.6 (CH), 128.0 (CH), 127.7 (CH), 127.5 (CH), 127.1 (CH), 121.9 (CH<sub>2</sub>), 120.2 (CH), 119.5 (CH), 119.5 (CH), 119.0 (CH<sub>2</sub>), 58.4 (CH<sub>2</sub>), 49.5 (CH<sub>2</sub>). IR (film): 1602, 1533, 1522, 1460, 1263 cm<sup>-1</sup>. HRMS (EI): Exact mass calcd for C<sub>26</sub>H<sub>21</sub>N<sub>3</sub>S [M]<sup>+</sup>: 407.1456. Found: 407.1665.

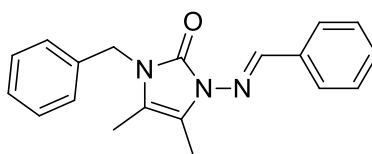

**(E)-1-Benzyl-3-(benzylideneamino)-4,5-dimethyl-1H-imidazol-2(3H)-one (Table 3, 3i)** : Synthesized according to general procedure A using carbazone **1a** (0.146 g, 0.600 mmol), the propargylic amine<sup>12</sup> (0.105 g, 0.660 mmol), Et<sub>3</sub>N (0.0120 g, 0.120 mmol) and MeCN (2.0 mL) and heated at 100 °C for 6 hours. The crude mixture was purified by Et<sub>3</sub>N treated silica gel column chromatography using 2% hexanes/CH<sub>2</sub>Cl<sub>2</sub> and the pure compound was obtained as a white solid (0.150 g, 82 %). TLC R<sub>f</sub> = 0.12 in 2% hexanes/CH<sub>2</sub>Cl<sub>2</sub>. <sup>1</sup>H NMR (300 MHz; CDCl<sub>3</sub>) δ 9.96 (s, 1H), 7.80-7.75 (m, 2H), 7.46-7.39 (m, 3H), 7.37-7.31 (m, 2H), 7.30-7.25 (m, 3H), 4.87 (s, 2H), 2.16 (d, *J* = 1.1 Hz, 3H), 1.94 (d, *J* = 1.1 Hz, 3H). <sup>13</sup>C NMR (100 MHz; CDCl<sub>3</sub>): δ 150.7 (CH), 150.0 (C), 137.5 (C), 135.4 (C), 130.0 (CH), 128.7 (CH), 128.6 (CH), 127.4 (CH), 127.4 (CH), 127.3 (CH), 127.0 (CH), 115.2 (C), 112.0 (C), 44.1 (CH<sub>2</sub>), 8.8 (CH<sub>3</sub>), 8.3 (CH<sub>3</sub>). IR (film): 1701, 1664, 1653, 1558, 1387, 1265 cm<sup>-1</sup>. HRMS (EI): Exact mass calcd for C<sub>19</sub>H<sub>19</sub>N<sub>3</sub>O [M]<sup>+</sup>: 305.1528. Found: 305.1522.

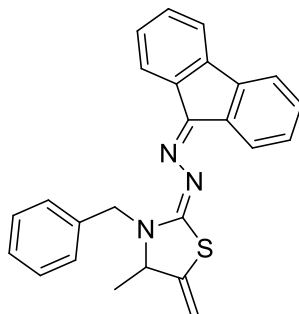

**(E)-2-((9H-Fluoren-9-ylidene)hydrazono)-3-benzyl-4-methyl-5-methylenethiazolidine**

**(Table 3, 4i)** : Synthesized according to general procedure A using thiosemicarbazone **1p** (0.225 g, 0.600 mmol), the propargylic amine<sup>12</sup> (0.105 g, 0.660 mmol), Et<sub>3</sub>N (0.0120 g, 0.120 mmol) and MeCN (2.0 mL) and heated at 120 °C for 2 hours. The crude mixture was purified by column chromatography and the pure compound was obtained as an orange foam (0.161 g, 68 %). TLC R<sub>f</sub> = 0.26 in 25% CH<sub>2</sub>Cl<sub>2</sub>/hexanes. <sup>1</sup>H NMR (300 MHz; CDCl<sub>3</sub>) δ 8.55-8.52 (m, 1H), 7.93-7.89 (m, 1H), 7.66-7.60 (m, 2H), 7.44-7.16 (m, 9H), 5.41 (d, *J* = 15.3, 1H), 5.23 (t, *J* = 1.97, 1H), 5.14 (t, *J* = 1.85, 1H), 4.53-4.43 (m, 2H), 1.45 (d, *J* = 6.40, 3H). <sup>13</sup>C NMR (100 MHz; CDCl<sub>3</sub>): δ 170.2 (C), 153.2 (C), 143.7 (C), 141.4 (C), 140.2 (C), 137.8 (C), 136.3 (C), 131.9 (C), 129.8 (CH), 129.2 (CH), 128.9 (CH), 127.9 (CH), 127.8 (CH), 127.7 (CH), 127.5 (CH), 121.7 (CH), 119.5 (CH), 119.5 (CH), 105.3 (CH<sub>2</sub>), 62.5 (CH), 48.8 (CH<sub>2</sub>), 20.3 (CH<sub>3</sub>) IR (film): 2854, 1599, 1521, 1506, 1423, 1398, 1244 cm<sup>-1</sup>. HRMS (EI): Exact mass calcd for C<sub>25</sub>H<sub>21</sub>N<sub>3</sub>S [M]<sup>+</sup>: 395.1456. Found: 395.1432.

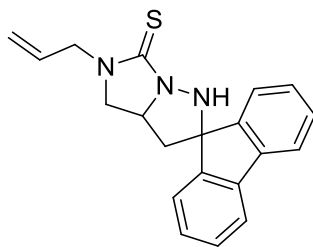

**5'-Allyl-3',3a',4',5'-tetrahydrospiro[fluorene-9,2'-imidazo[1,5-b]pyrazole]-6'(1'H)-thione**

**(Scheme 2, 6a)** : Synthesized according to general procedure A using thiosemicarbazone **1n** (0.225 g, 0.600 mmol), diallylamine (0.0640 g, 0.660 mmol,) and MeCN (2.0 mL) and heated at 150 °C for 2 hours. The crude mixture was purified by column chromatography using 5 % EtOAc/CH<sub>2</sub>Cl<sub>2</sub> and the pure compound was obtained as a orange was obtained as a yellow solid (0.158 g, 79 %). TLC R<sub>f</sub> = 0.4 in 5% EtOAc/CH<sub>2</sub>Cl<sub>2</sub>. <sup>1</sup>H NMR (300 MHz; DMSO-*d*<sub>6</sub>) δ 7.73 (dd, *J* = 13.7, 7.2 Hz, 2H), 7.66 (d, *J* = 7.3 Hz, 1H), 7.43-7.23 (m, 5H), 5.94-5.82 (m, 2H), 5.31-5.26 (m, 2H), 4.58-4.50 (m, 1H), 4.45-4.25 (m, 2H), 3.87 (dd, *J* = 10.7, 7.9 Hz, 1H), 3.68 (d, *J* = 10.6 Hz, 1H), 2.50-2.43 (m, 1H), 2.20-2.12 (m, 1H). <sup>13</sup>C NMR (100 MHz; DMSO-*d*<sub>6</sub>): δ 188.5 (C), 150.7 (C), 139.2 (C), 138.5 (C), 131.8 (CH), 128.7 (CH), 127.9 (CH), 127.8 (CH), 124.6 (CH), 123.8 (CH), 119.9 (CH), 119.6 (CH), 118.1 (CH<sub>2</sub>), 74.7 (C), 60.6 (CH), 49.7 (CH<sub>2</sub>), 49.6

(CH<sub>2</sub>), 45.4 (CH<sub>2</sub>). IR (film): 1680, 1610, 1553, 1379, 1360, 1310, 1255 cm<sup>-1</sup>. HRMS (EI): Exact mass calcd for C<sub>20</sub>H<sub>19</sub>N<sub>3</sub>S [M]<sup>+</sup>: 333.1300. Found: 333.1292.

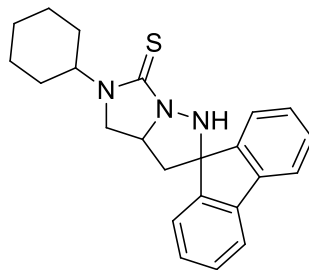

**5'-Cyclohexyl-3',3a',4',5'-tetrahydrospiro[fluorene-9,2'-imidazo[1,5-b]pyrazole]-6'(1'H)-thione (Scheme 2, 6b)** : Synthesized according to general procedure A using thiosemicarbazone **1n** (0.225 g, 0.600 mmol), diallylamine (0.0640 g, 0.660 mmol,) and MeCN (2.0 mL) and heated at 150 °C for 4 hours. The crude mixture was purified by column chromatography using 5 % EtOAc/CH<sub>2</sub>Cl<sub>2</sub> and the pure compound was obtained as a yellow solid (0.145 g, 64 %). TLC R<sub>f</sub> = 0.26 in 5% EtOAc/CH<sub>2</sub>Cl<sub>2</sub>. <sup>1</sup>H NMR (300 MHz; DMSO-*d*<sub>6</sub>) δ 7.74 (dd, *J* = 14.4, 7.0 Hz, 2H), 7.64 (d, *J* = 7.5 Hz, 1H), 7.42-7.22 (m, 5H), 5.85 (s, 1H), 4.51-4.41 (m, 2H), 3.85-3.79 (m, 1H), 3.70-3.67 (m, 1H), 2.42 (dd, *J* = 12.6, 6.7 Hz, 1H), 2.11-2.04 (m, 1H), 1.88-1.75 (m, 4H), 1.65 (d, *J* = 10.8 Hz, 1H), 1.55-1.28 (m, 4H), 1.19-1.08 (m, 1H). <sup>13</sup>C NMR (100 MHz; DMSO-*d*<sub>6</sub>): δ 187.6 (C), 150.7 (C), 148.4 (C), 139.2 (C), 128.7 (CH), 128.0 (CH), 127.8 (CH), 124.6 (CH), 123.8 (CH), 119.9 (CH), 119.6 (CH), 74.6 (C), 60.5 (CH), 55.3 (CH), 46.2 (CH<sub>2</sub>), 45.4 (CH<sub>2</sub>), 28.9 (CH<sub>2</sub>), 28.8 (CH<sub>2</sub>), 25.1 (CH<sub>2</sub>), 25.0 (CH<sub>2</sub>), 24.9 (CH<sub>2</sub>). IR (film): 1680, 1653, 1556, 1456, 1263, 1226, 1032 cm<sup>-1</sup>. HRMS (EI): Exact mass calcd for C<sub>23</sub>H<sub>25</sub>N<sub>3</sub>S [M]<sup>+</sup>: 375.1769. Found: 375.1797.

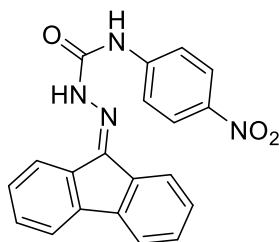

**2-(9H-Fluoren-9-ylidene)-N-(4-nitrophenyl)hydrazinecarbamide** : To a solution of 9-fluorenone hydrazone (1.94 g, 10 mmol) in MeCN (50.0 mL) was slowly added 4-nitrophenyl isocyanate (1.62 g, 10 mmol). The solution was stirred at room temperature for 3 hours and the title compound was obtained by filtration as a yellow amorphous solid (3.44 g, 96 %). <sup>1</sup>H NMR (300 MHz; DMSO-*d*<sub>6</sub>): δ 10.64 (br s, 1H), 10.02 (br s, 1H), 8.06-8.03 (m, 1H), 8.01-7.96 (m, 2H), 7.93-7.90 (m, 1H), 7.85-7.83 (m, 1H), 7.57-7.52 (m, 1H), 7.48-7.36 (m, 3H). <sup>13</sup>C NMR (75 MHz; DMSO-*d*<sub>6</sub>) δ 153.2 (C), 145.7 (C), 145.5 (C), 145.3 (C), 141.8 (C), 141.3 (C), 139.0 (C), 136.7 (C), 131.2 (CH), 130.0 (CH), 128.1 (CH), 127.0 (CH), 124.9 (CH), 122.2 (CH), 120.7 (CH), 120.2 (CH), 118.9 (CH). IR (film): 1684, 1649, 1541, 1529, 1263 cm<sup>-1</sup>. HRMS (EI): Exact mass calcd for C<sub>20</sub>H<sub>14</sub>N<sub>4</sub>O<sub>3</sub> [M]<sup>+</sup>: 358.1060. Found: 358.1060.

**References:**

- 1) W. Gan, P. J. Moon, C. Clavette, N. Das Neves, T. Markiewicz, A. B. Toderian and A. M. Beauchemin, *Org. Lett.*, 2013, **15**, 1890.
- 2) K. Garland, W. Gan, C. Depatie-Sicard and A. M. Beauchemin, *A. M. Org. Lett.*, 2013, **15**, 4074
- 3) J. -F. Vincent-Rocan, C. Clavette, K. Leckett and A. M. Beauchemin, *Chem. Eur. J.*, 2015, **21**, 3886
- 4) C. Clavette, W. Gan, A. Bongers, T. Markiewicz, A. B. Toderian, S.I. Gorelsky and A. M. Beauchemin, *J. Am. Chem. Soc.*, 2012, **134**, 16111
- 5) *Int. Pat.*, WO2013067646A1, 2013
- 6) E. Lieber and J. Ramachandran, *Can. J. Chem.*, 1959, **37**, 101.
- 7) O. Roy, S. Faure, V. Thery, C. Didierjean and C. Taillefumier, *Org. Lett.*, 2008, **10**, 921
- 8) J. A. Nieman, S. K. Nair, S. E. Heasley, B. L. Schultz, H. M. Zerth, R. A. Nugent, K. Chen, K. J. Stephanski, T. A. Hopkins, M. L. Knechtel, N. L. Oien, J. L. Wieber and M. W. Wathen, *Bioorg. Med. Chem. Lett.*, 2010, **20**, 3039.
- 9) B. Rajagopal, C.-H. Chou, C.-C. Chung and P.-C. Lin, *Org. Lett.*, 2014, **16**, 3752.
- 10) Z. Ya, J. A. Porco Jr. and J. K. Snyder, *Org. Lett.*, 2007, **9**, 393.
- 11) F. Y. Kwong, Y. M. Li, W. H. Lam, L. Qiu, H. W. Lee, C. H. Yeung, K. S. Chan and A. S. C. Chan, *Chem. Eur. J.*, 2005, **11**, 3872
- 12) P. Wipf and C. R. Hopkins, *J. Org. Chem.*, 1999, **64**, 6881.

## Spectra

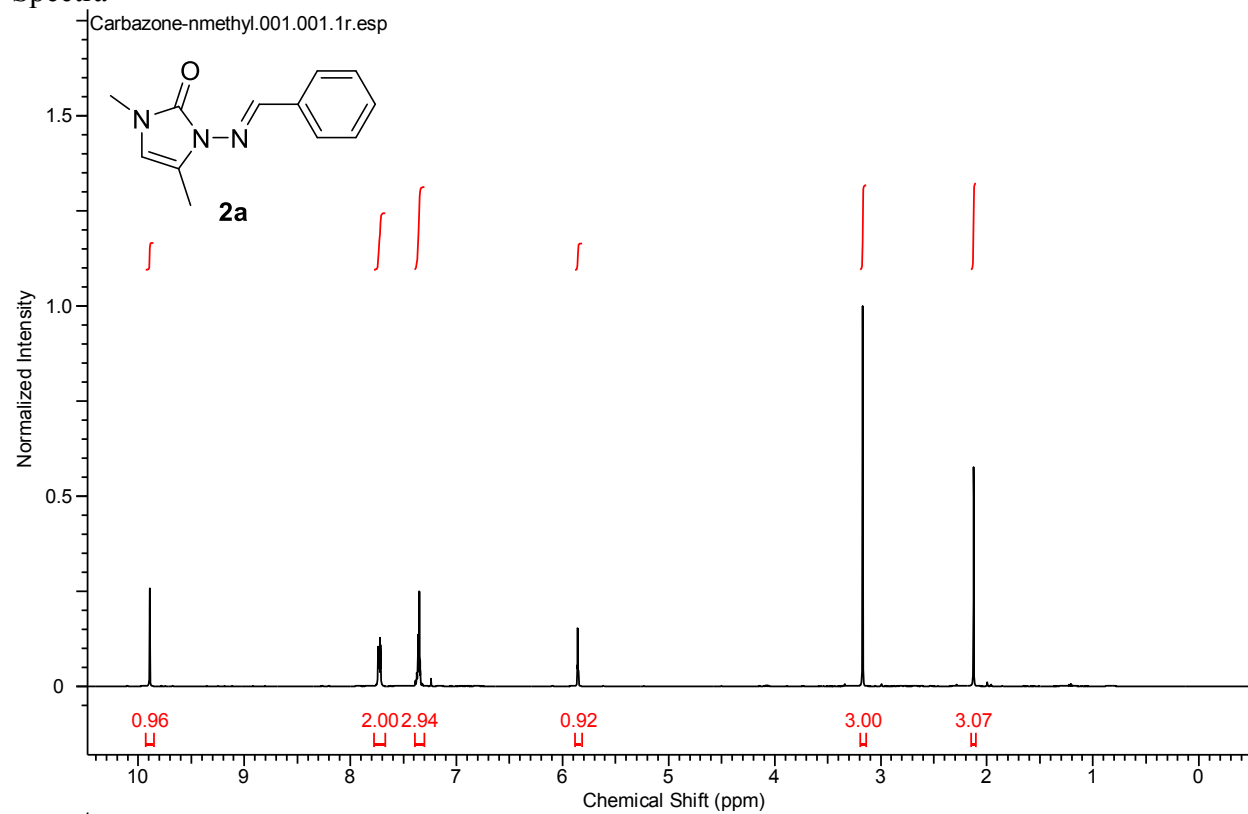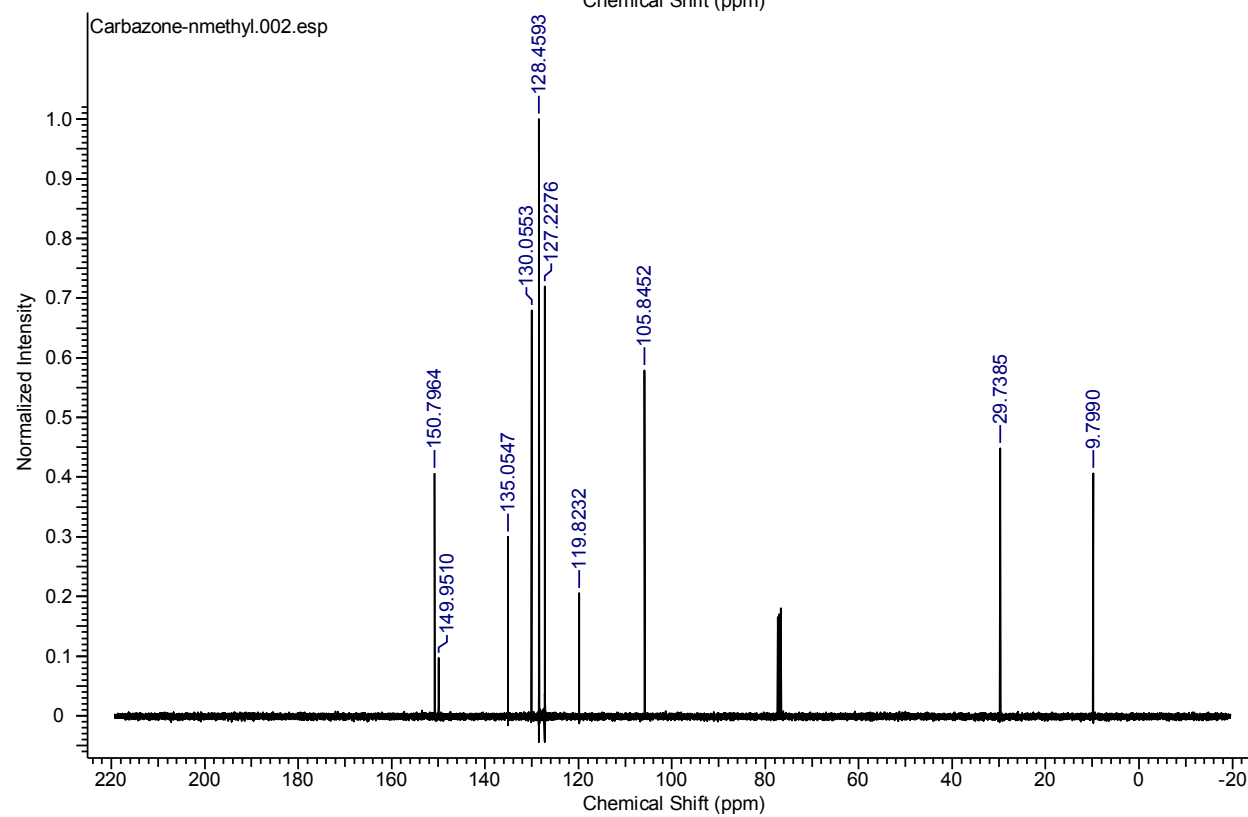

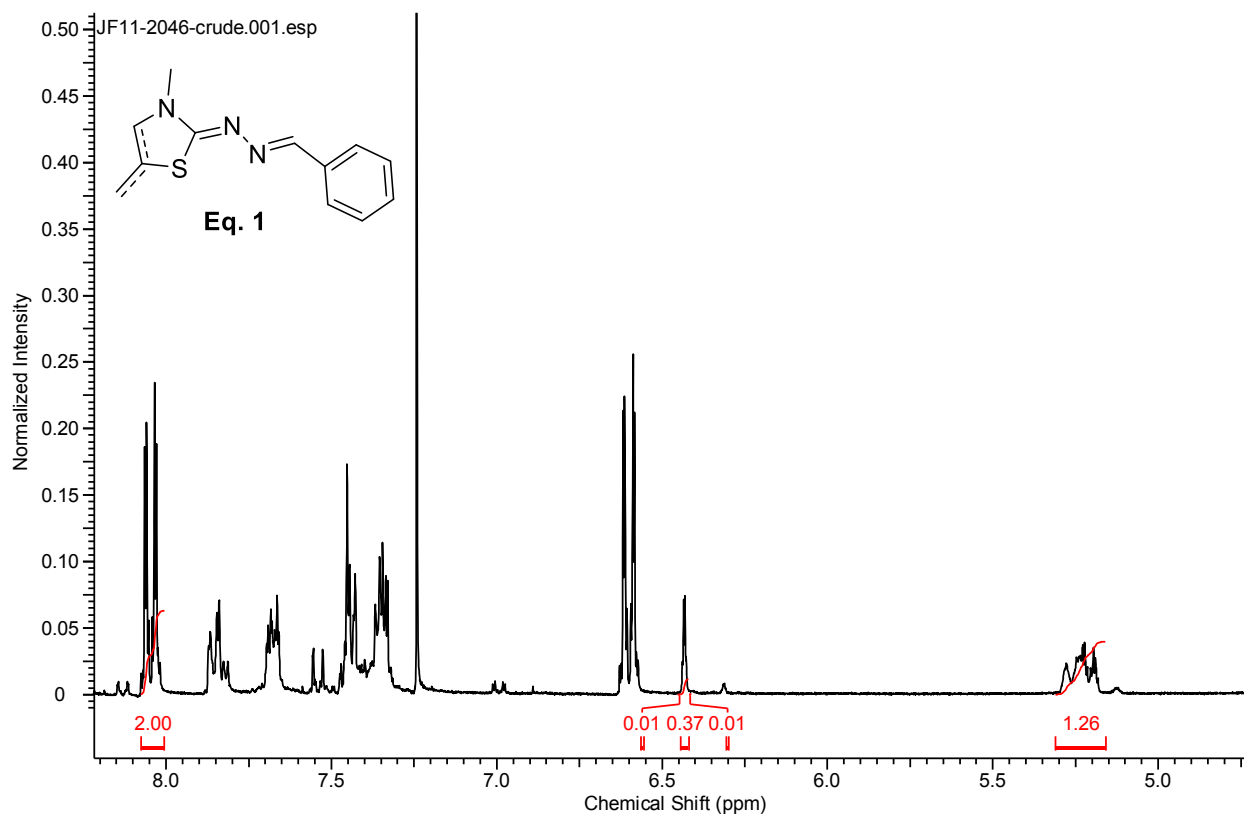

According to paranitroaniline production: 37 % isomerize and 63 % of desired product.

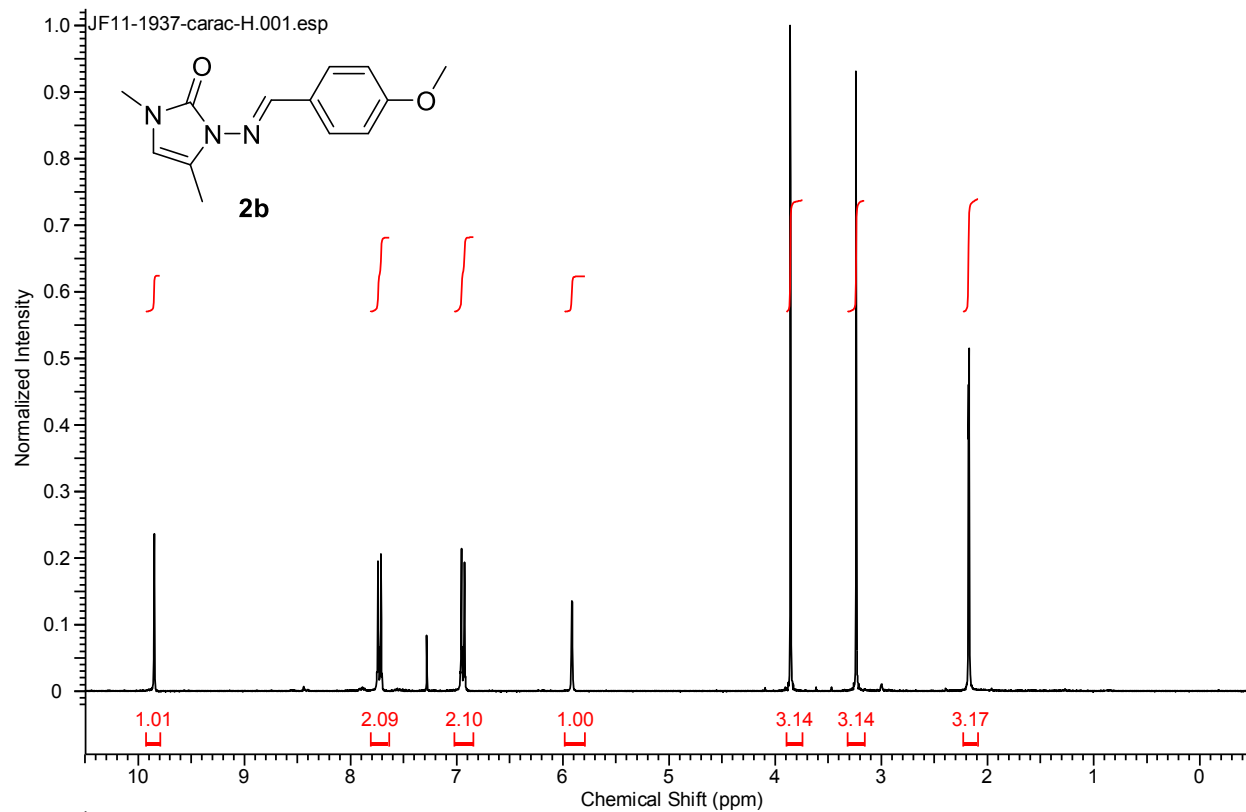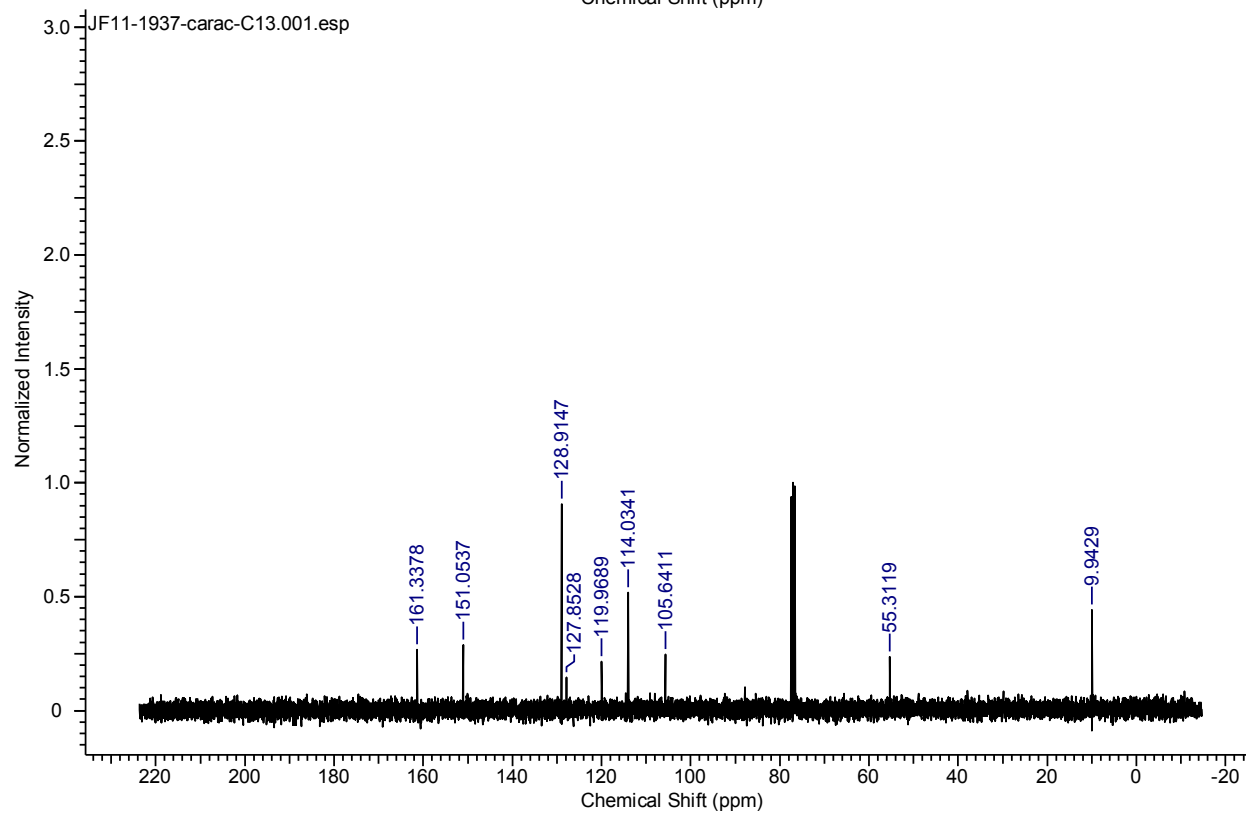



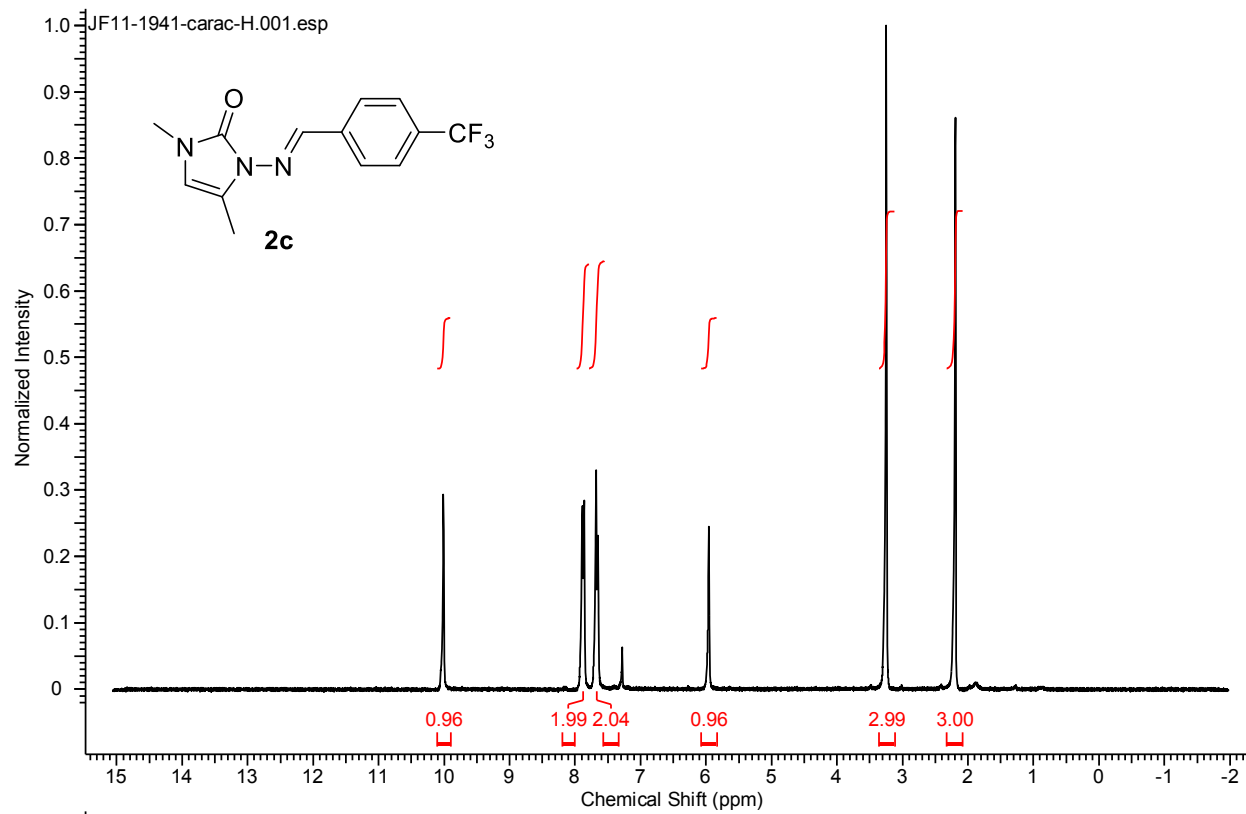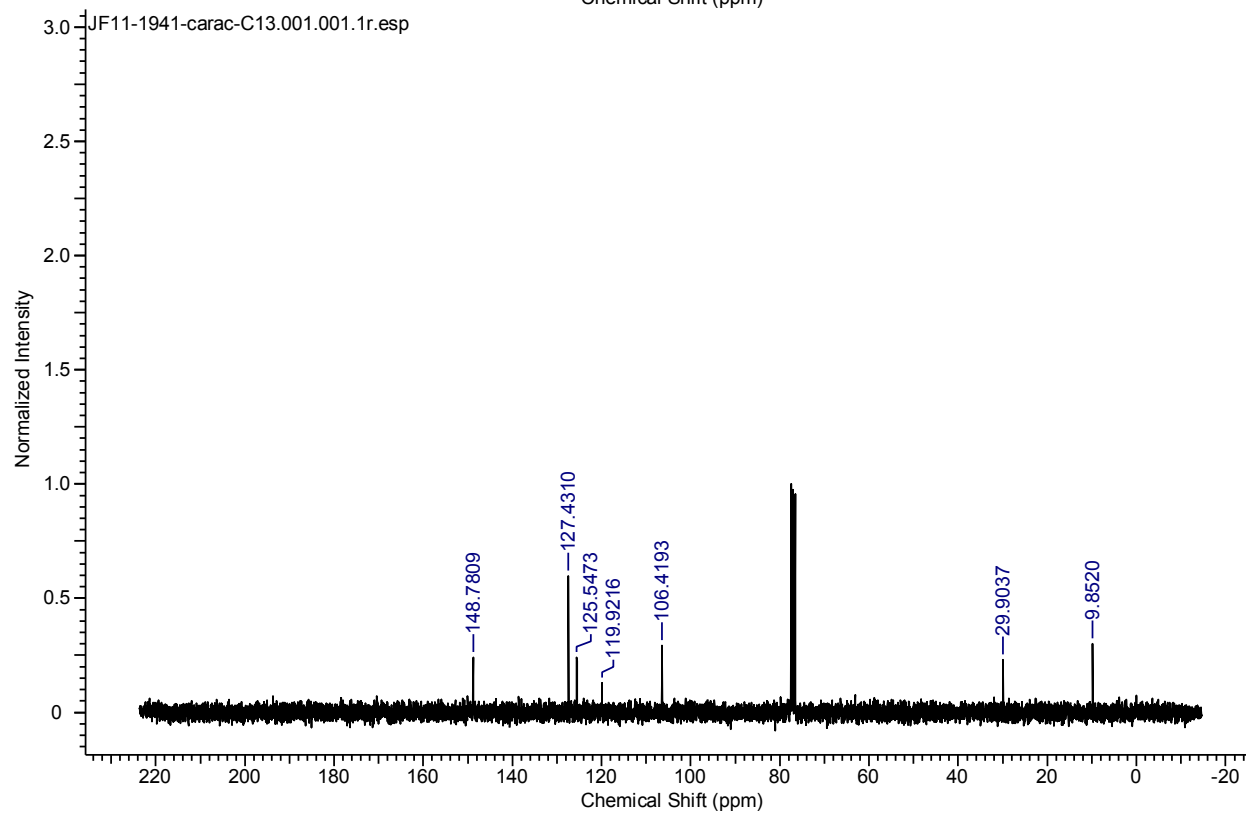

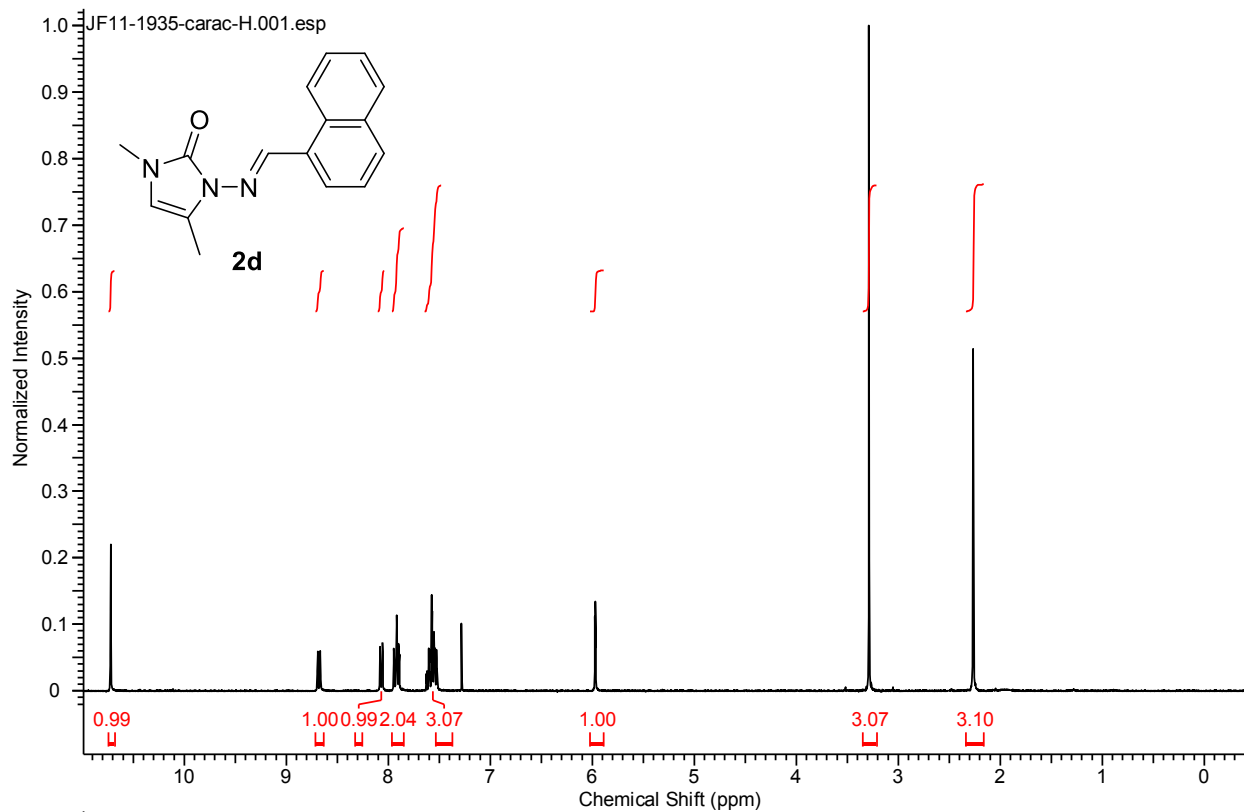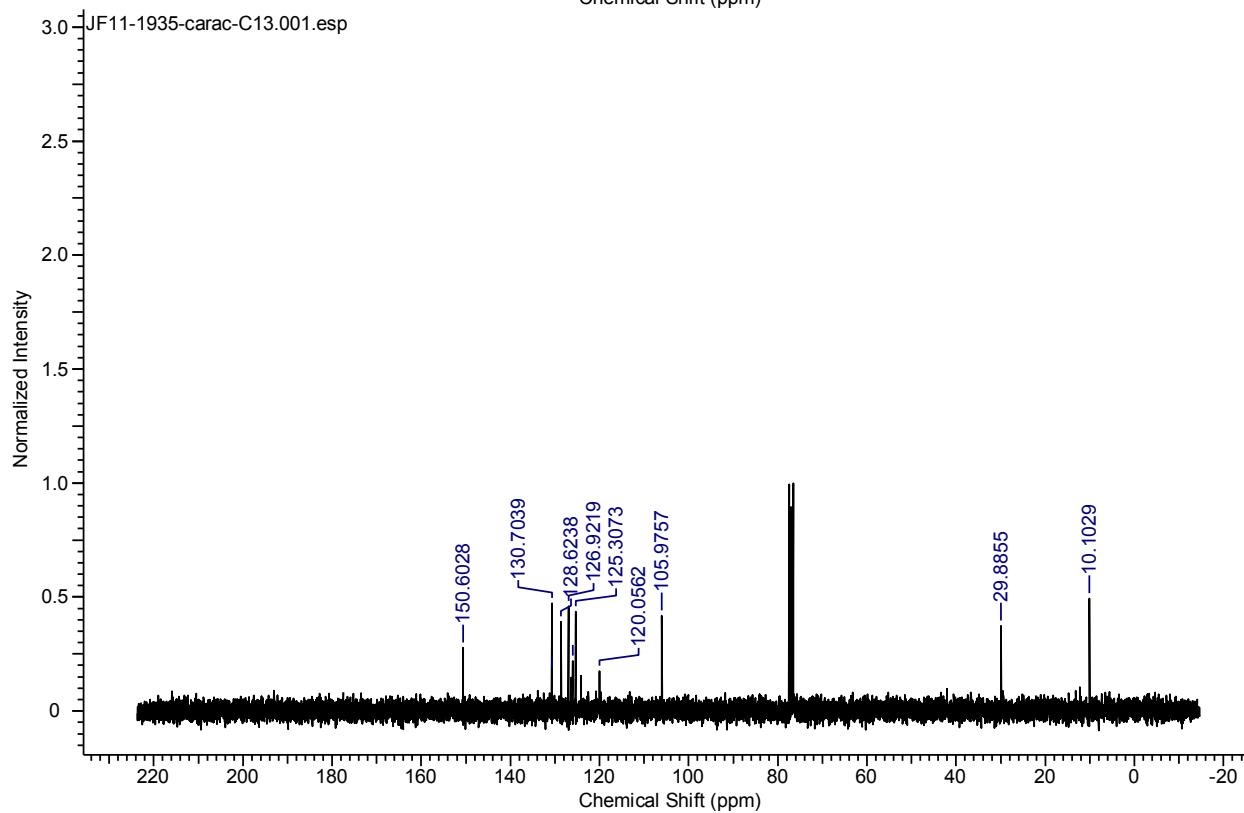

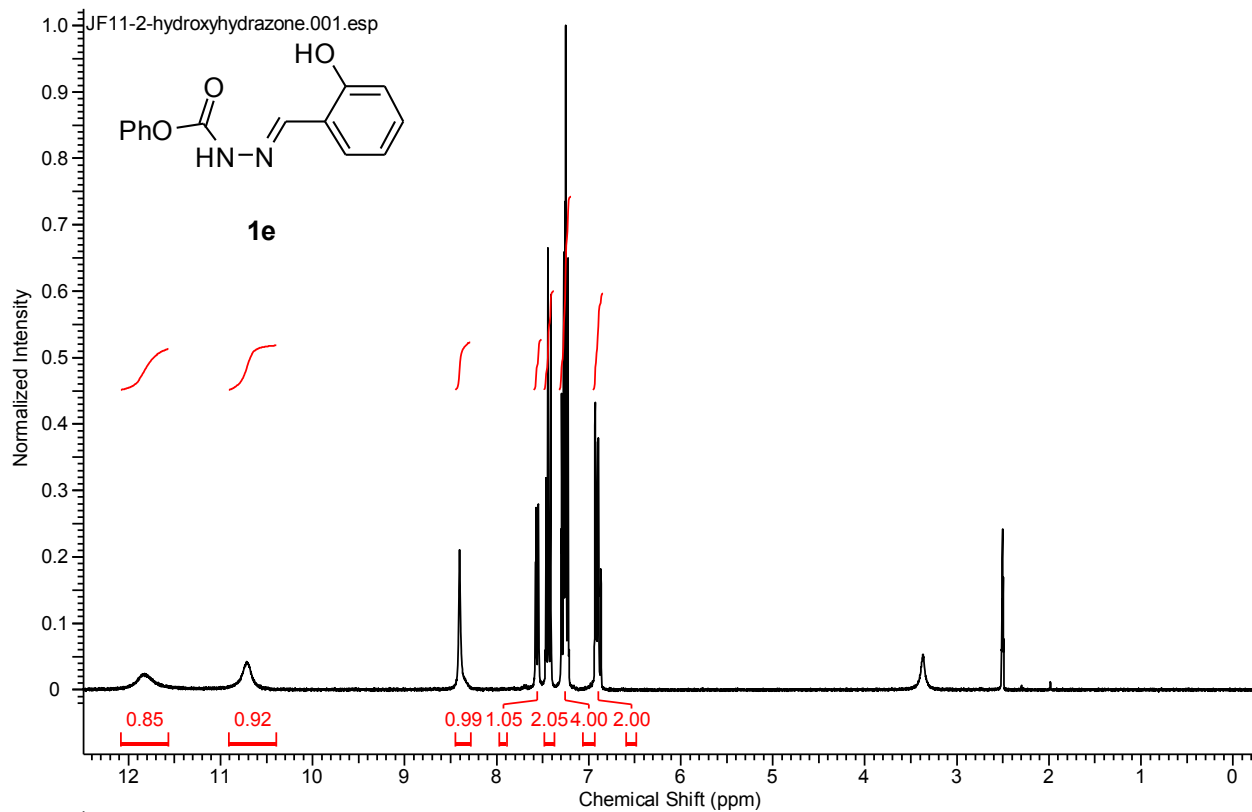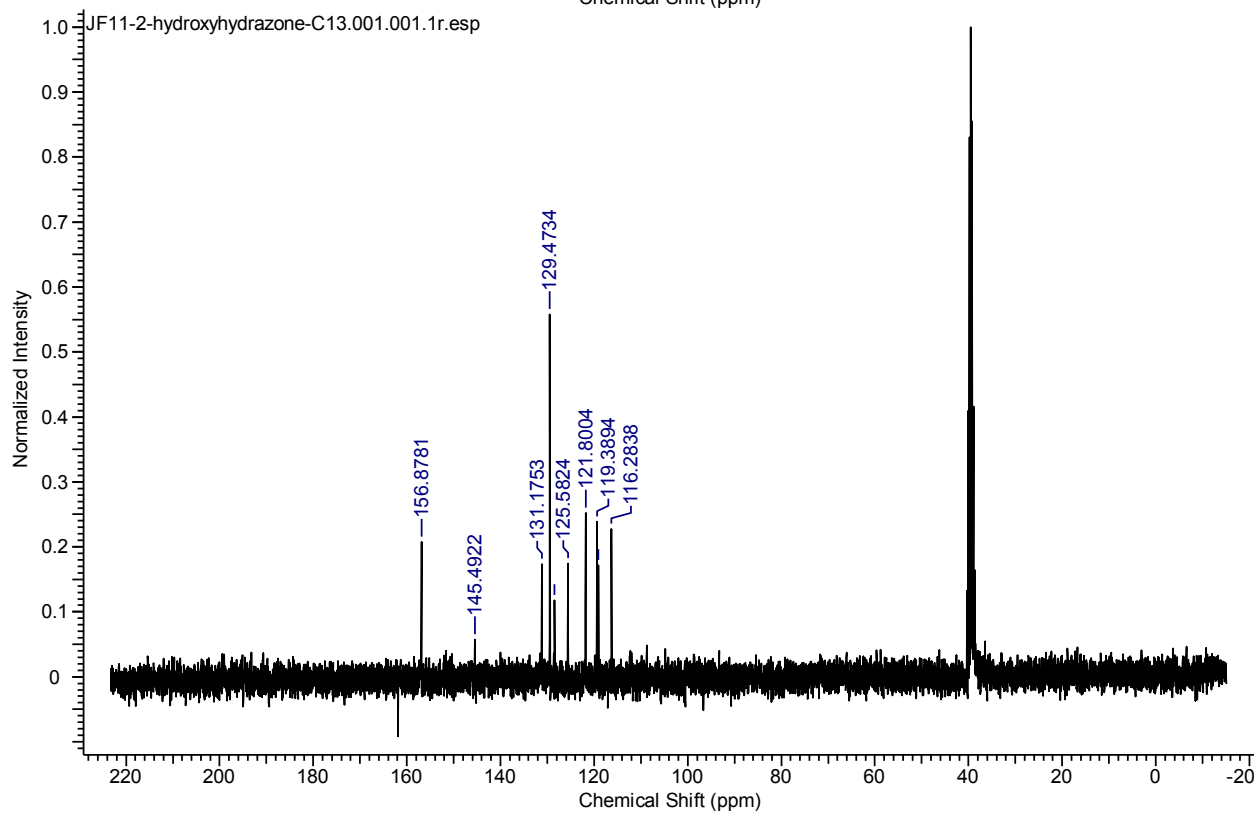

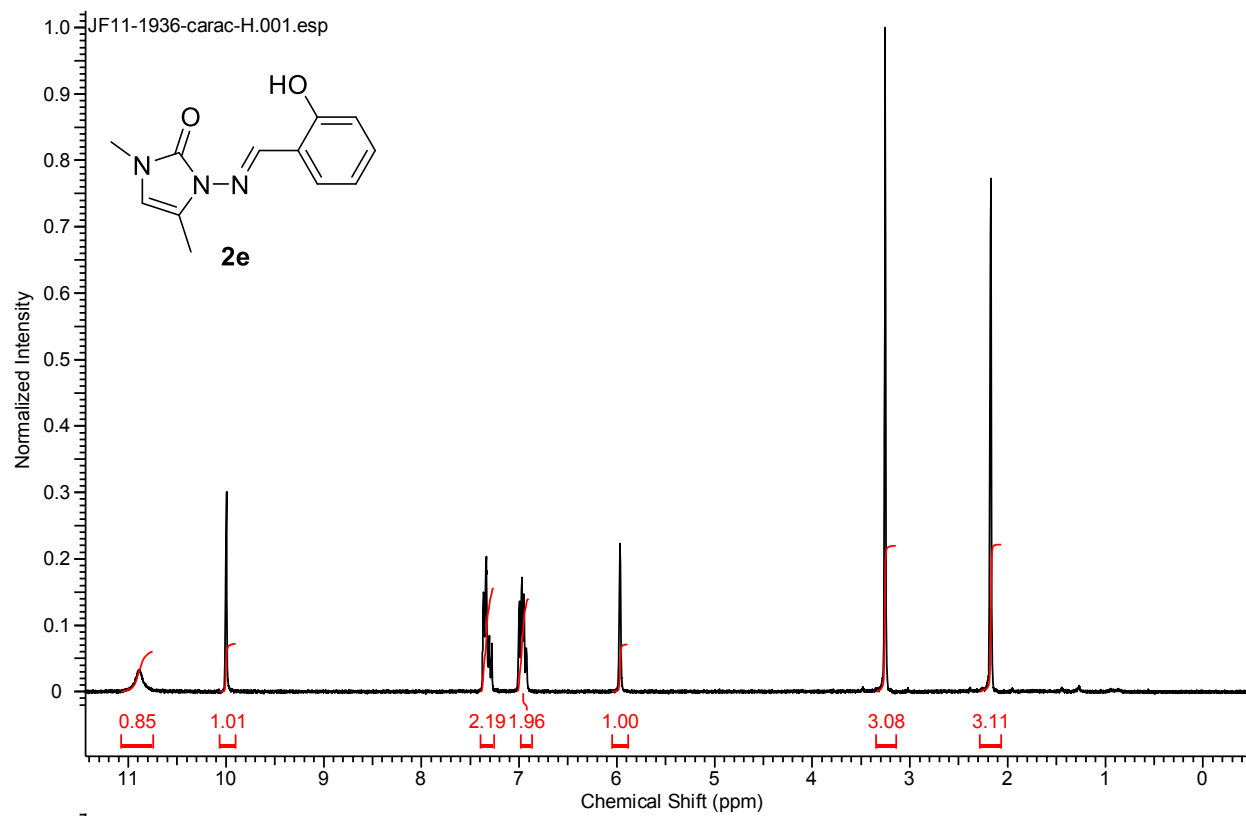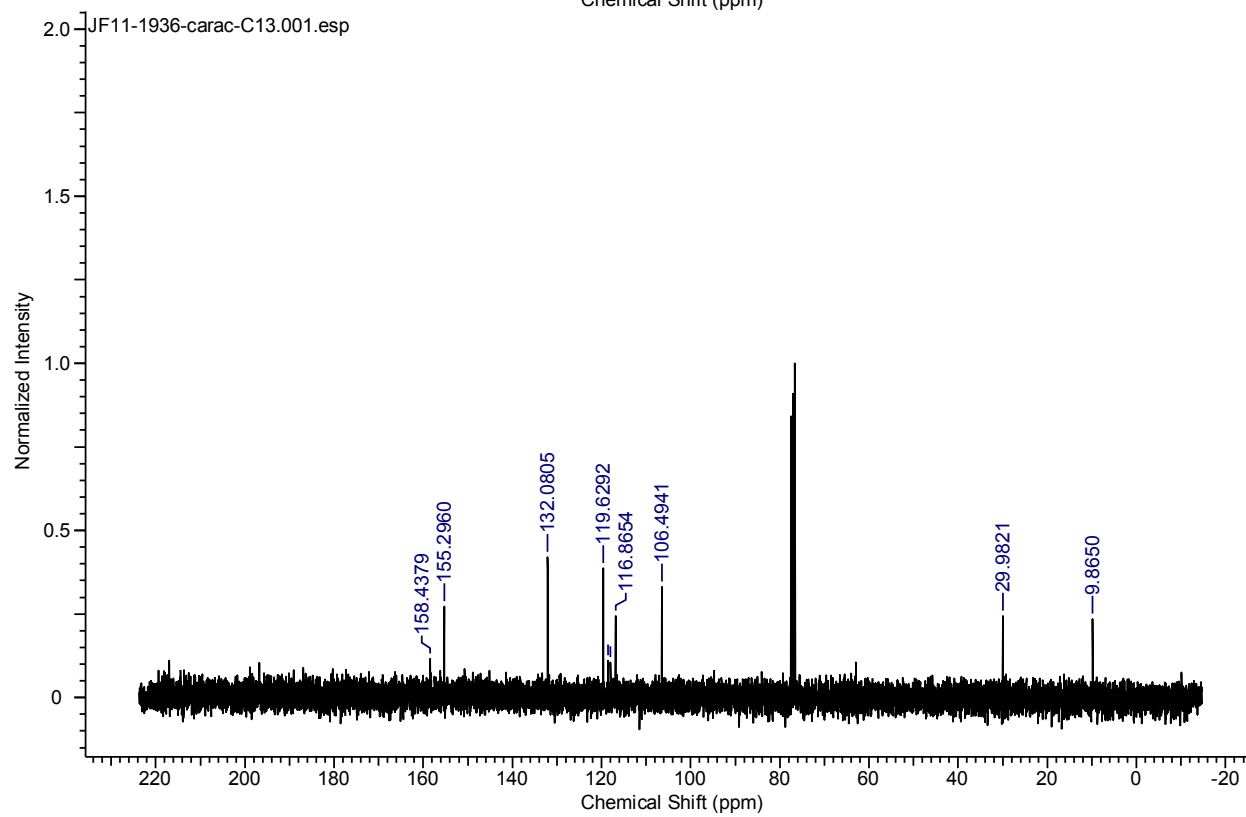

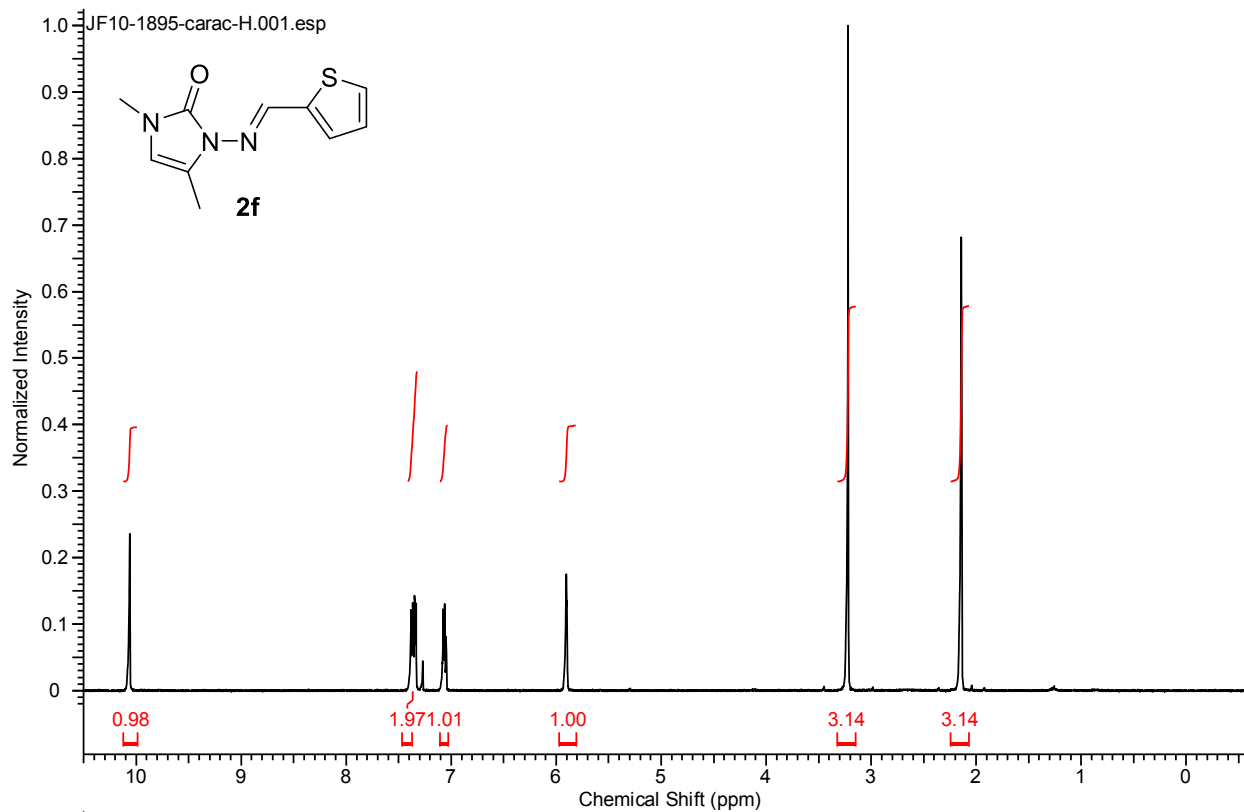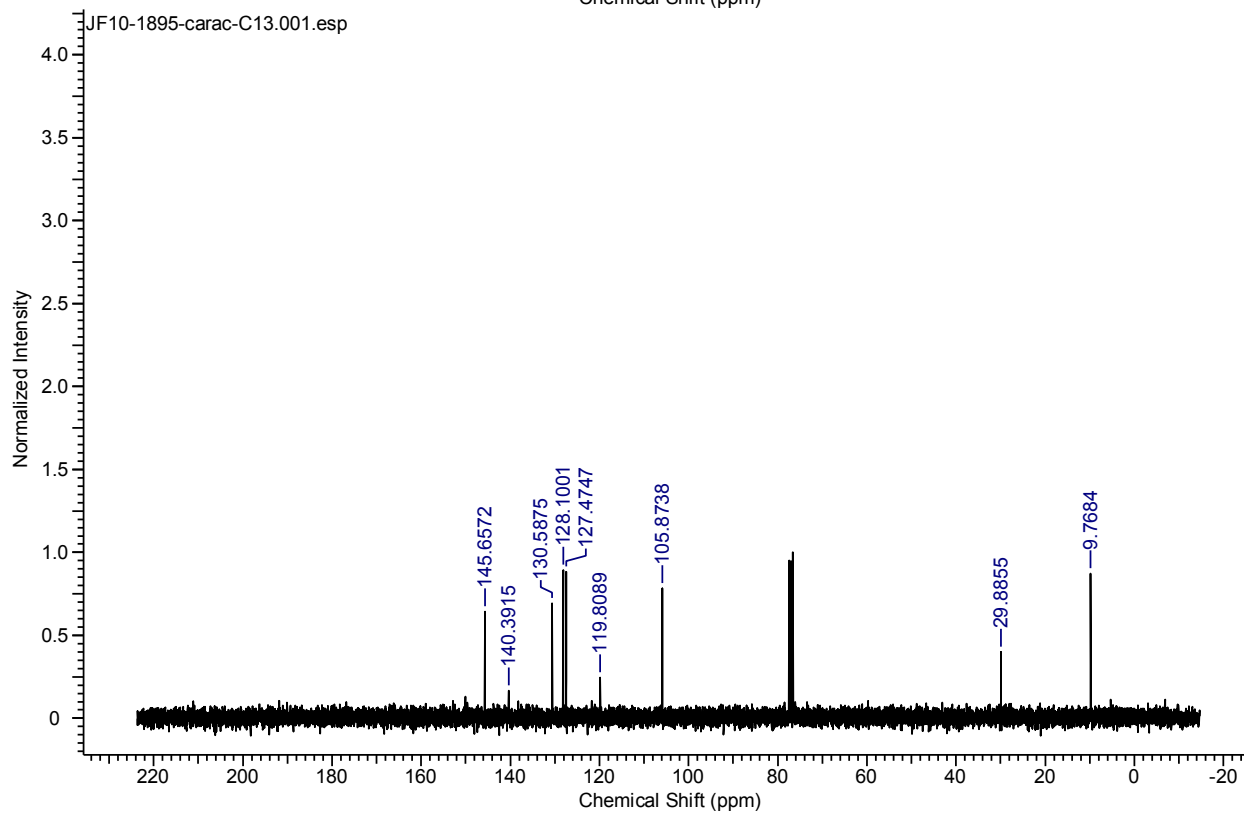

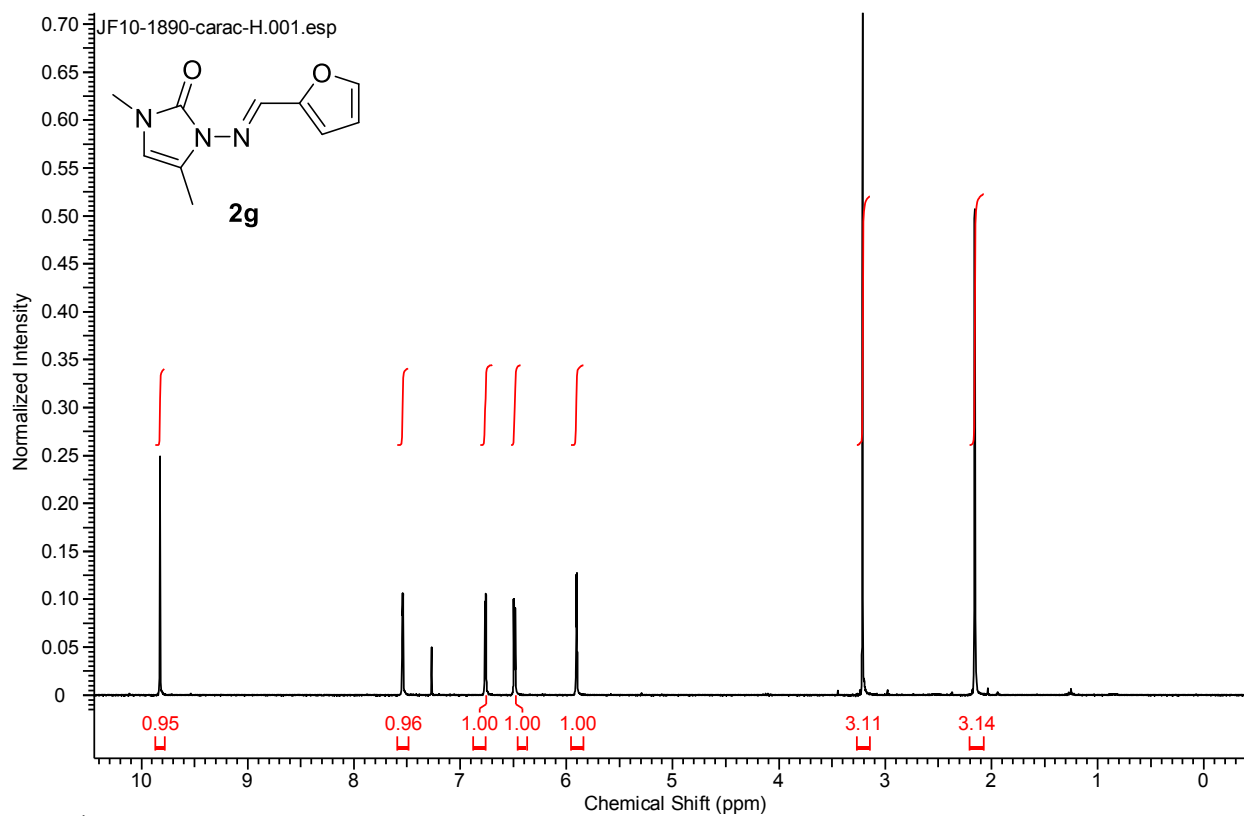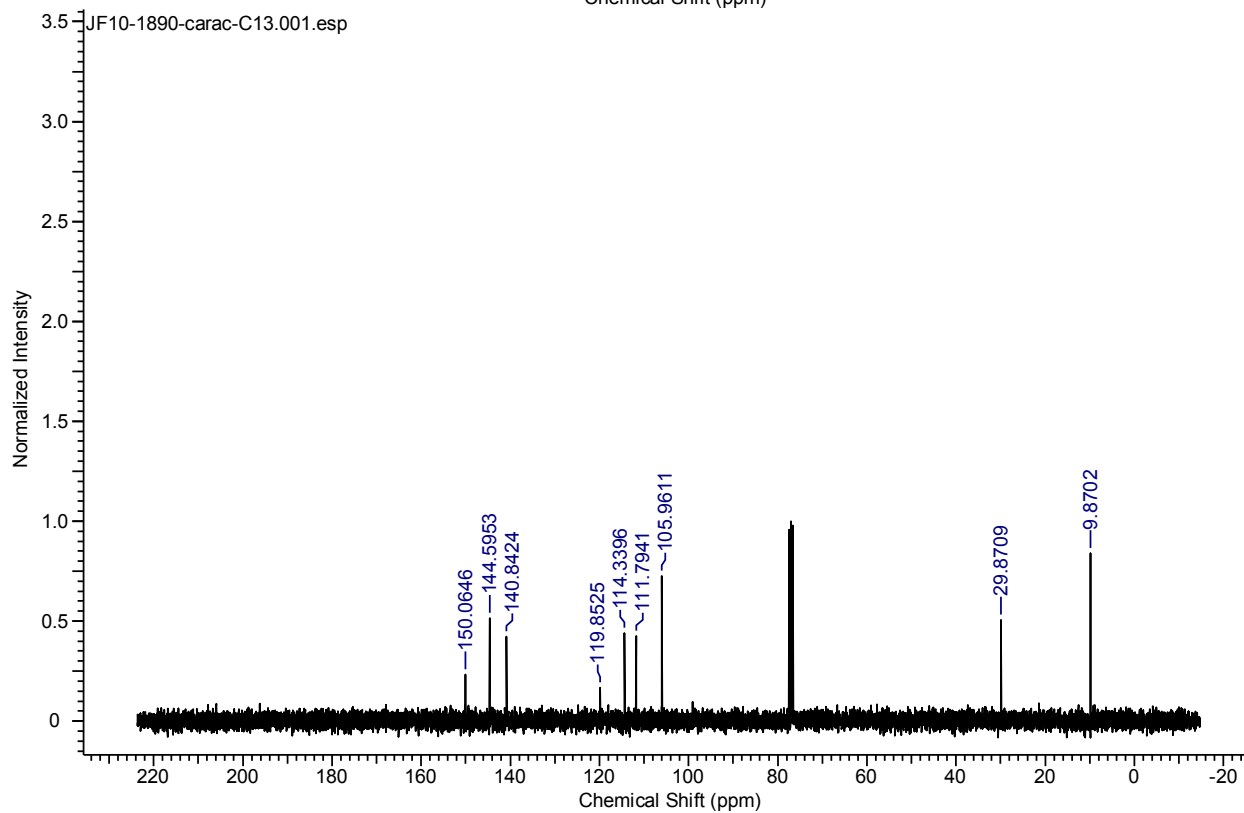

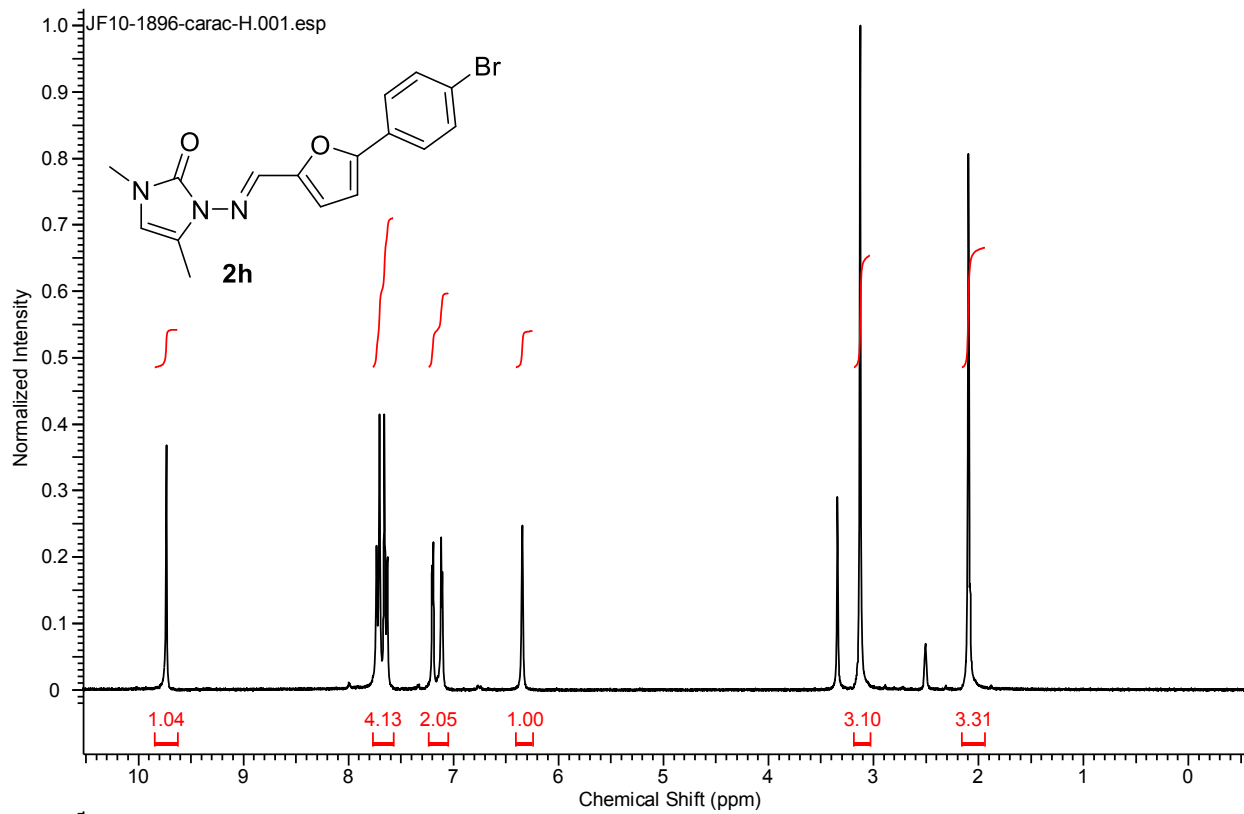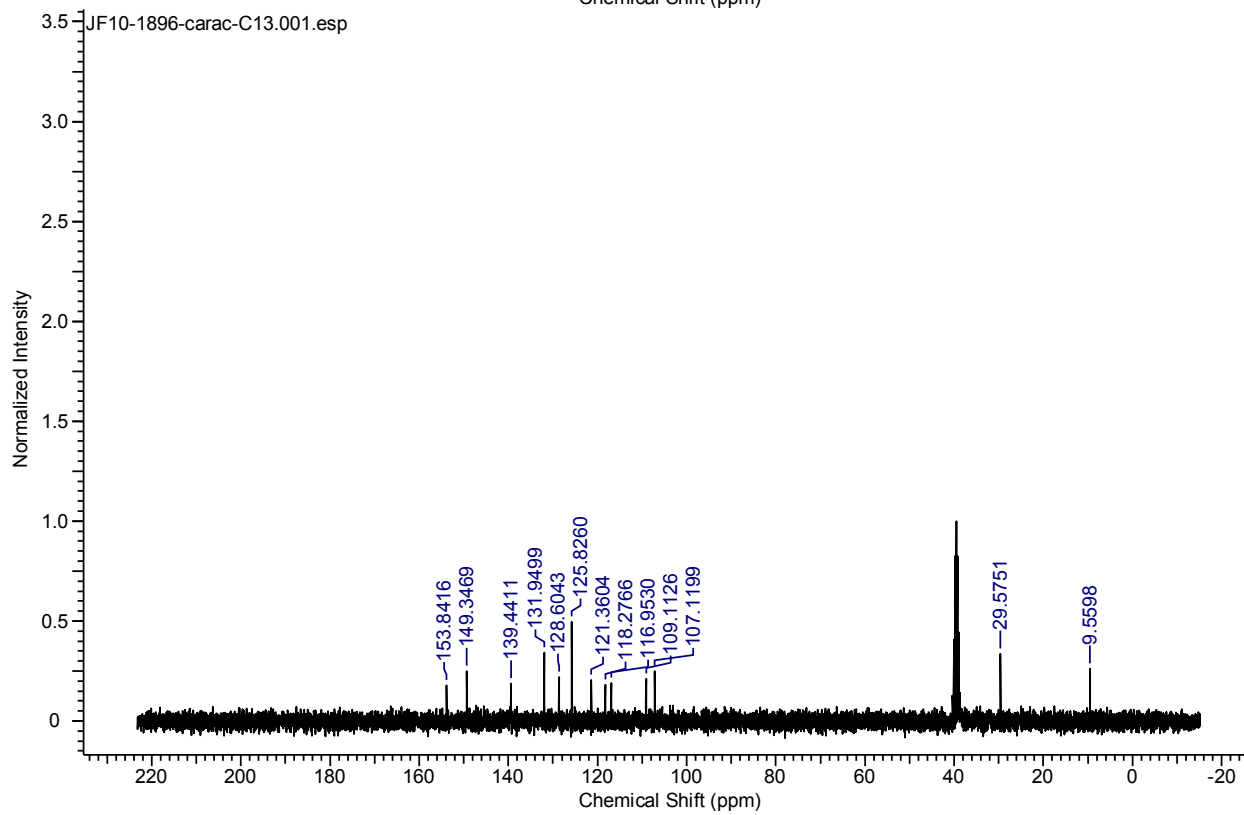

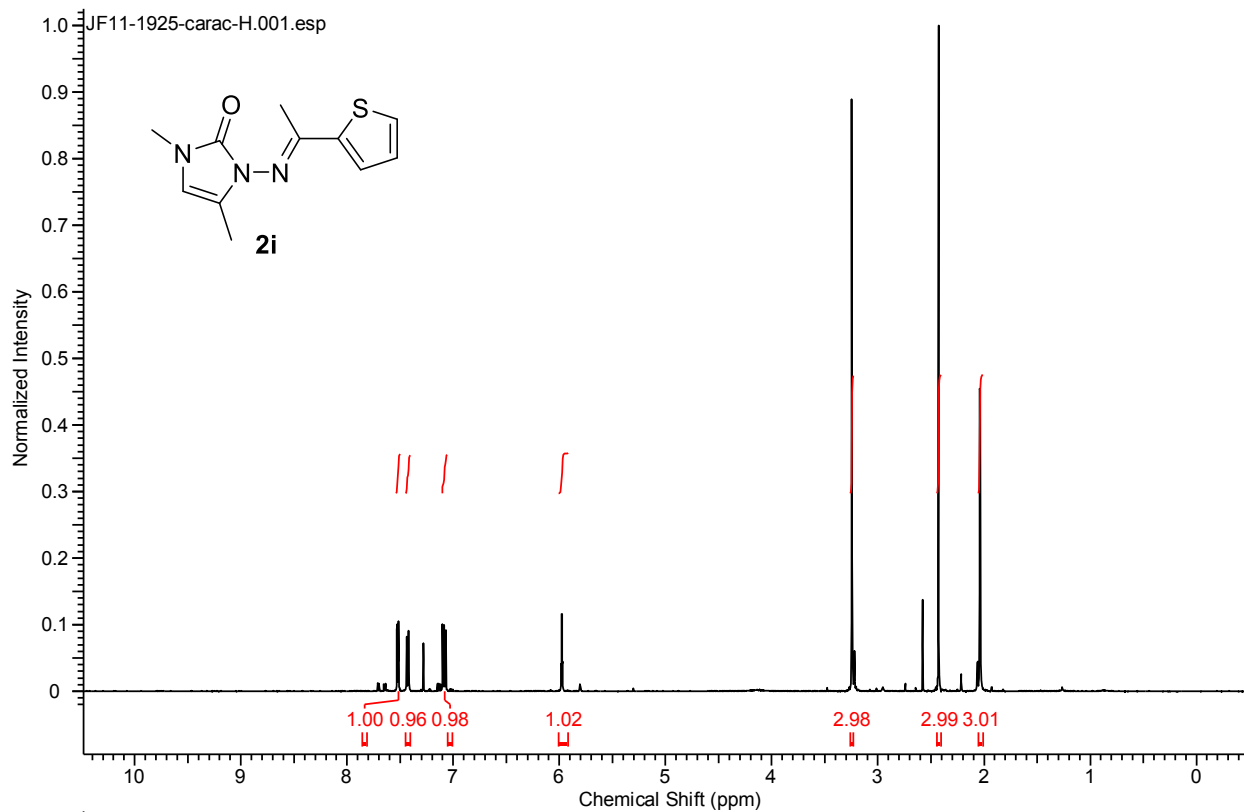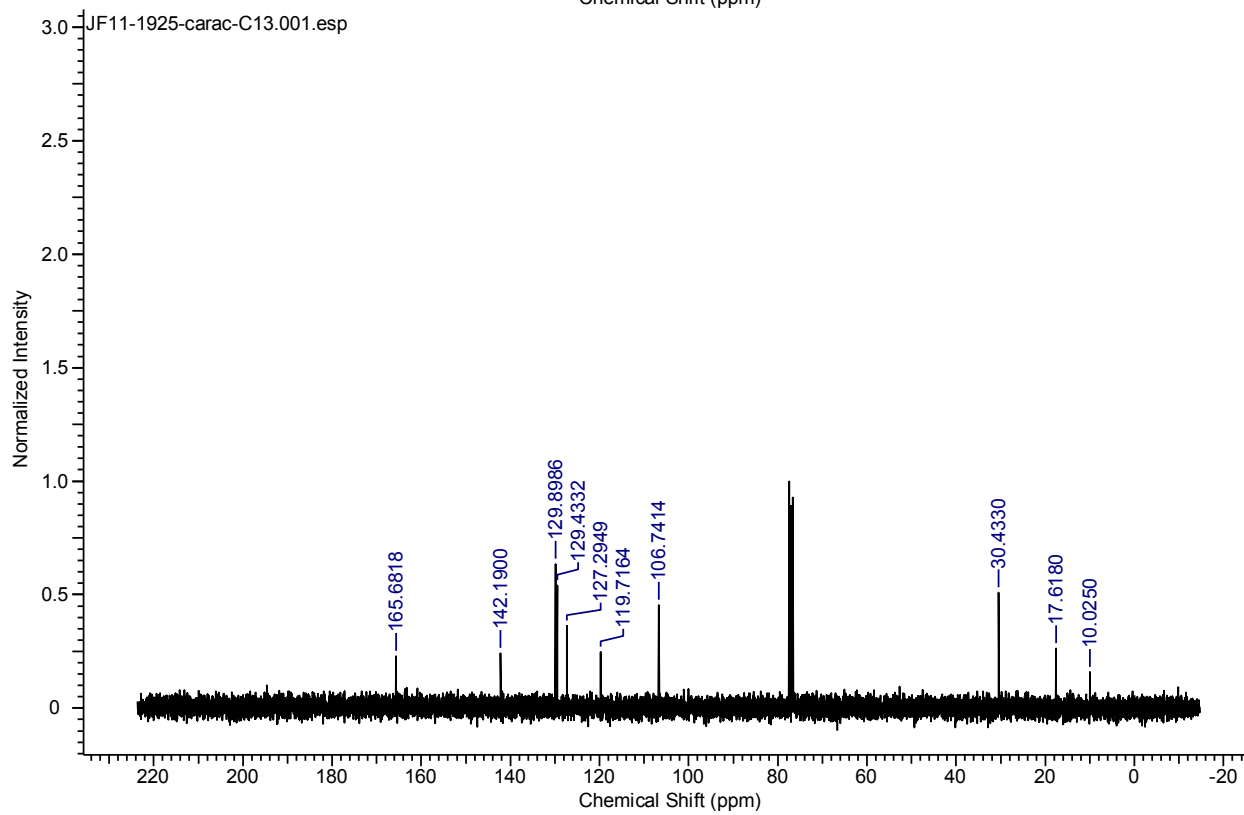



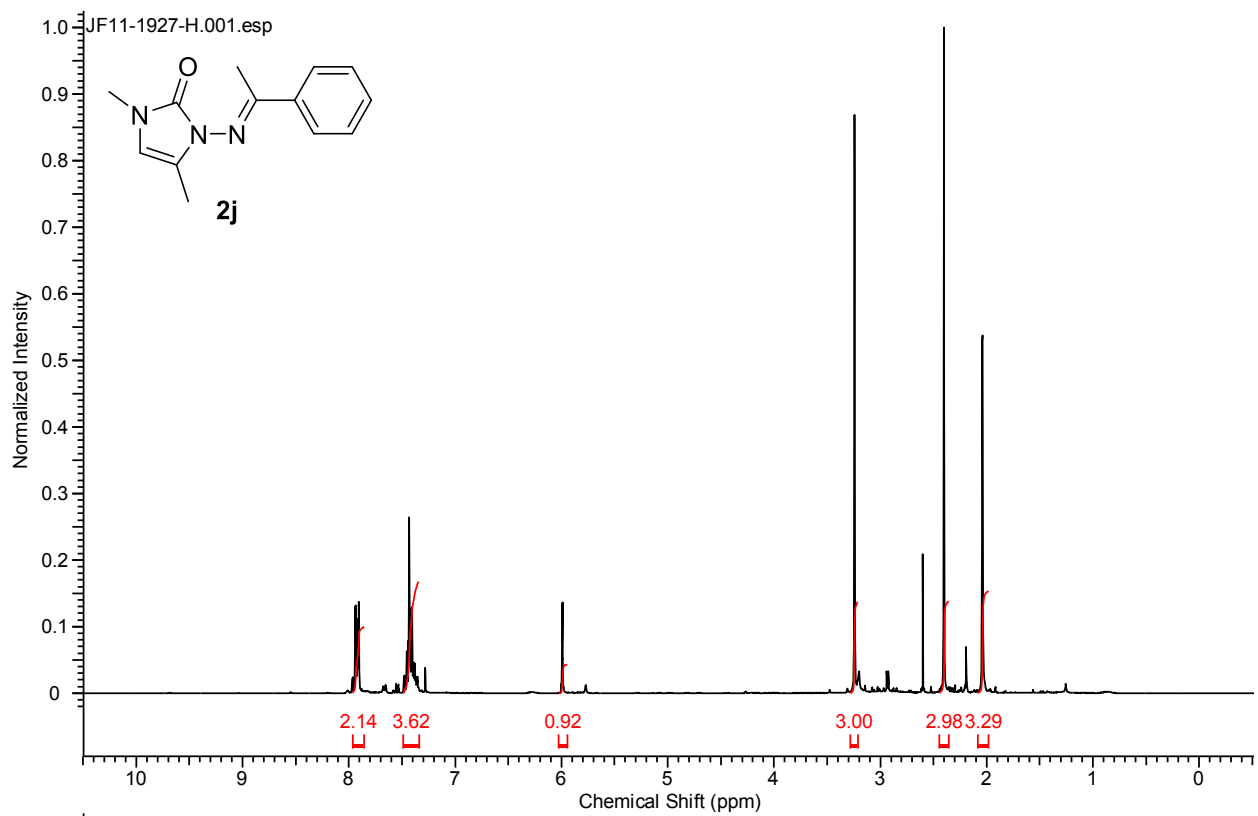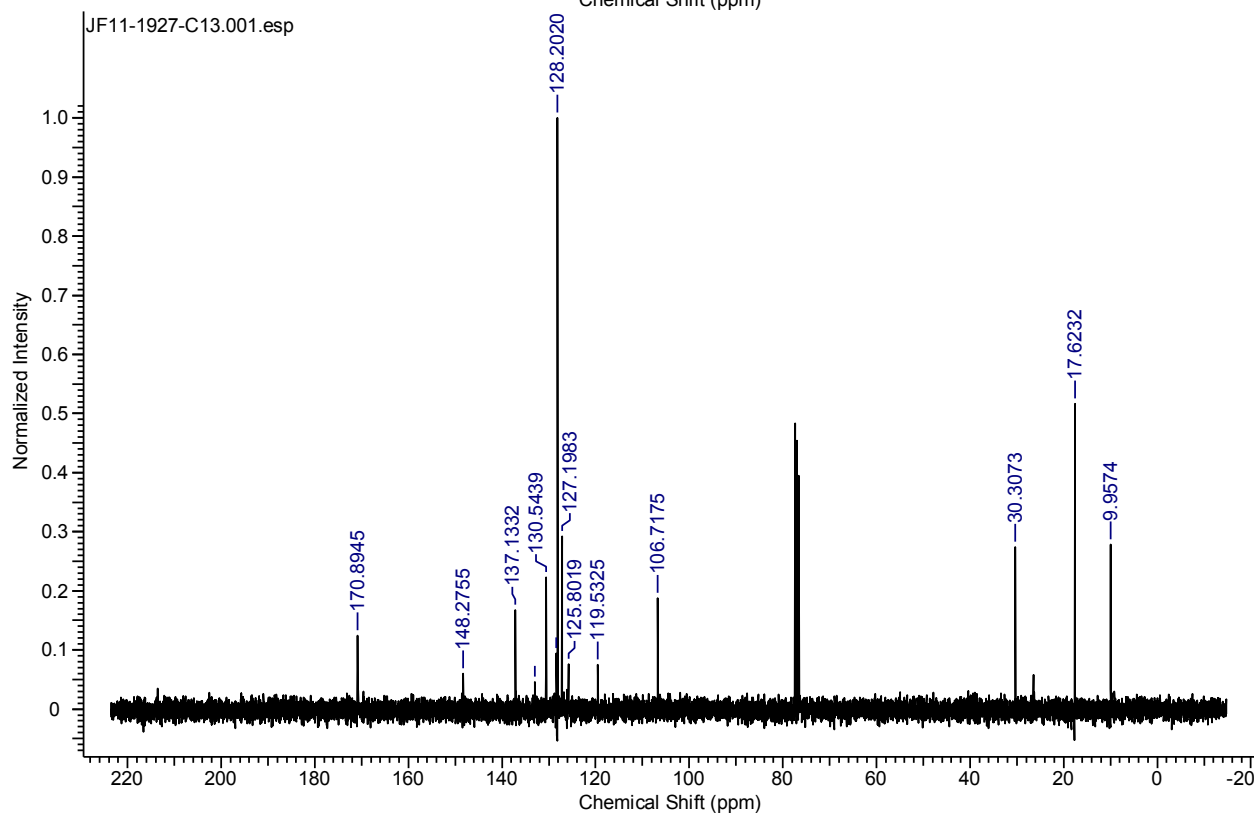

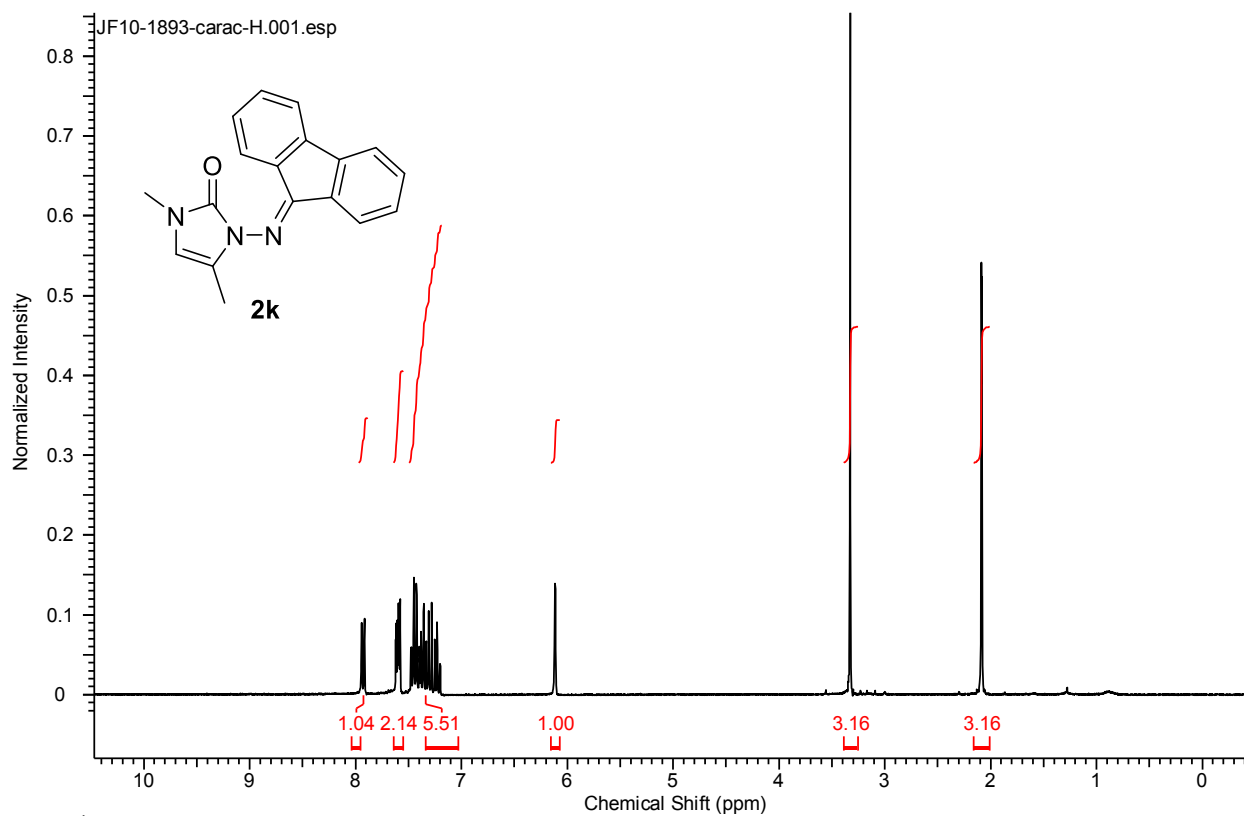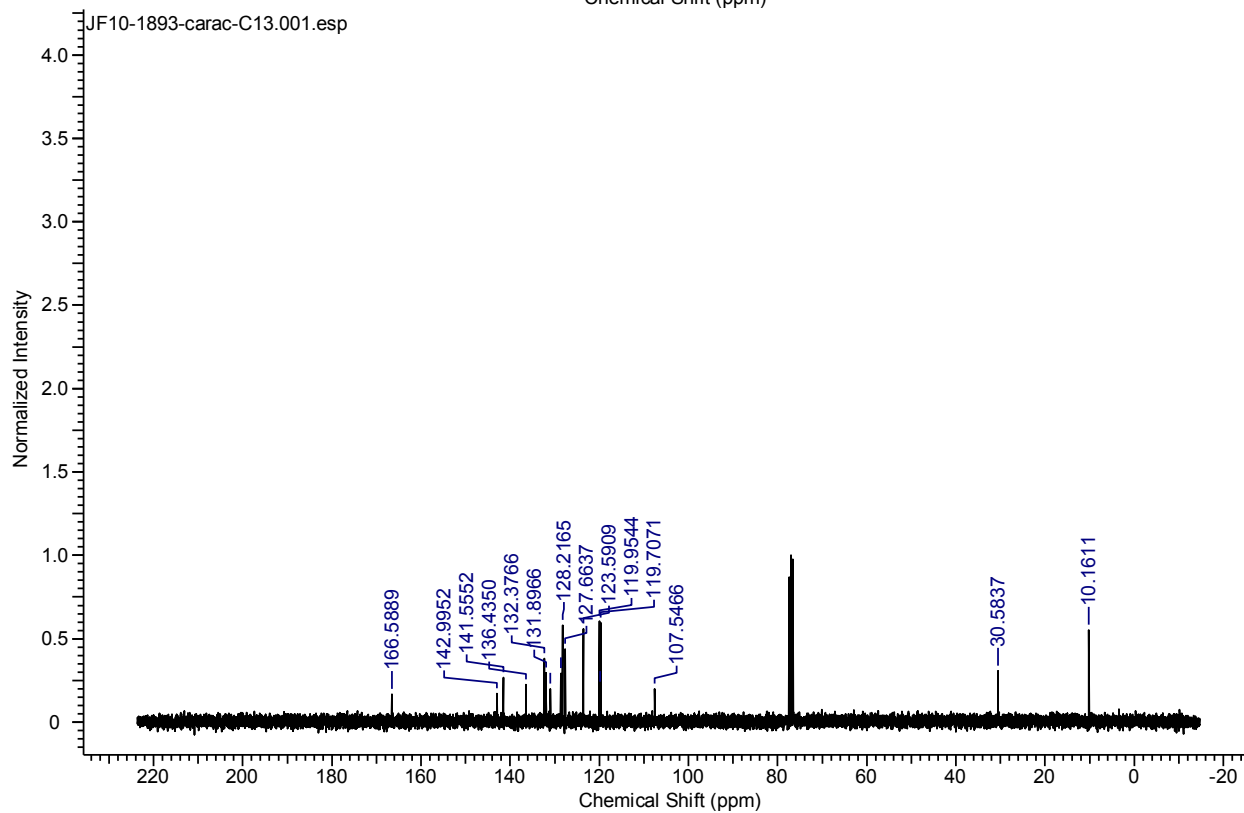

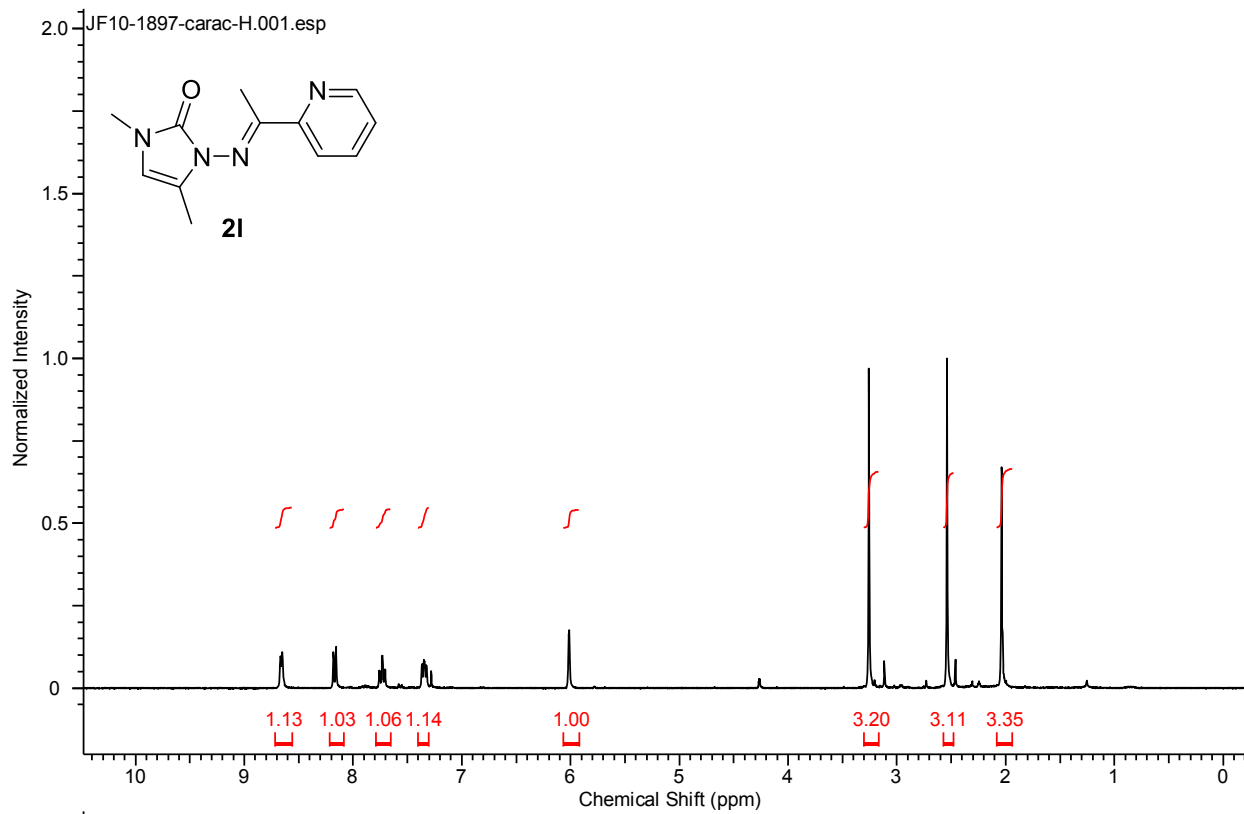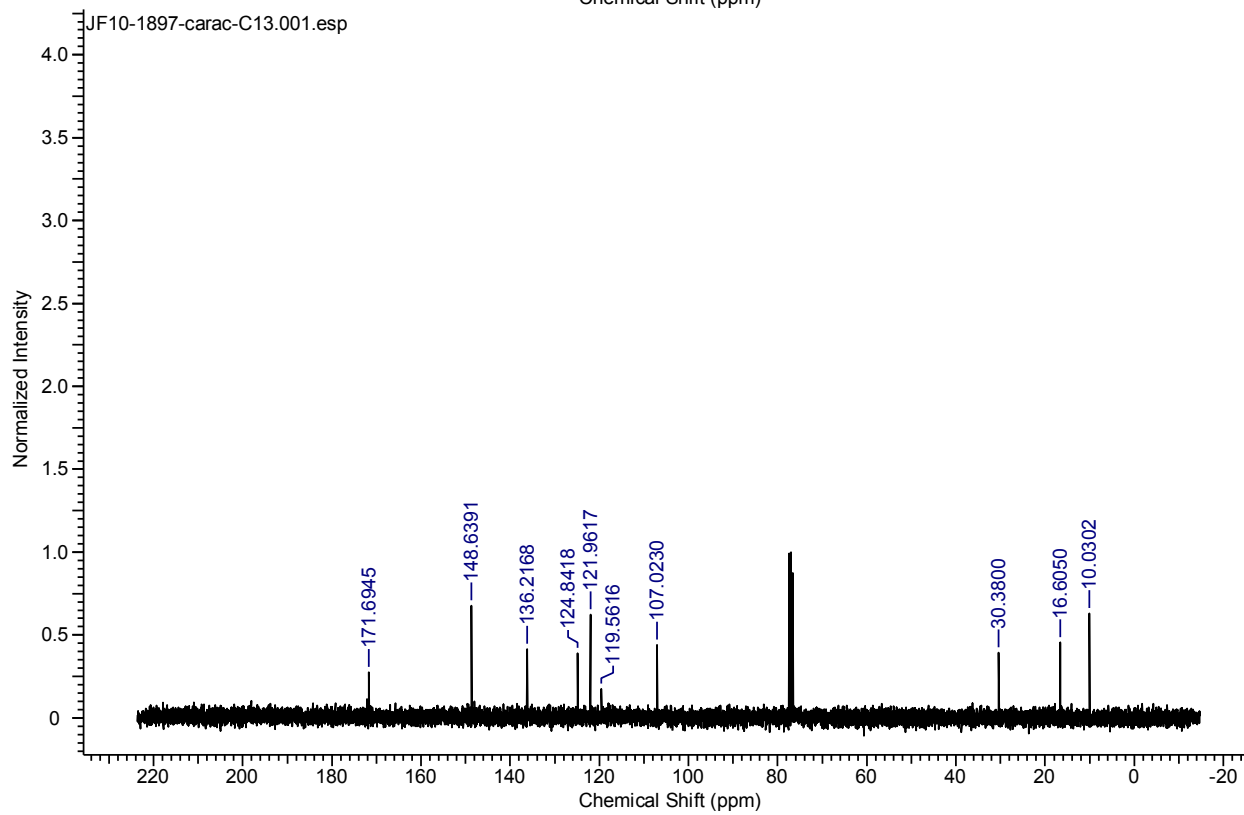

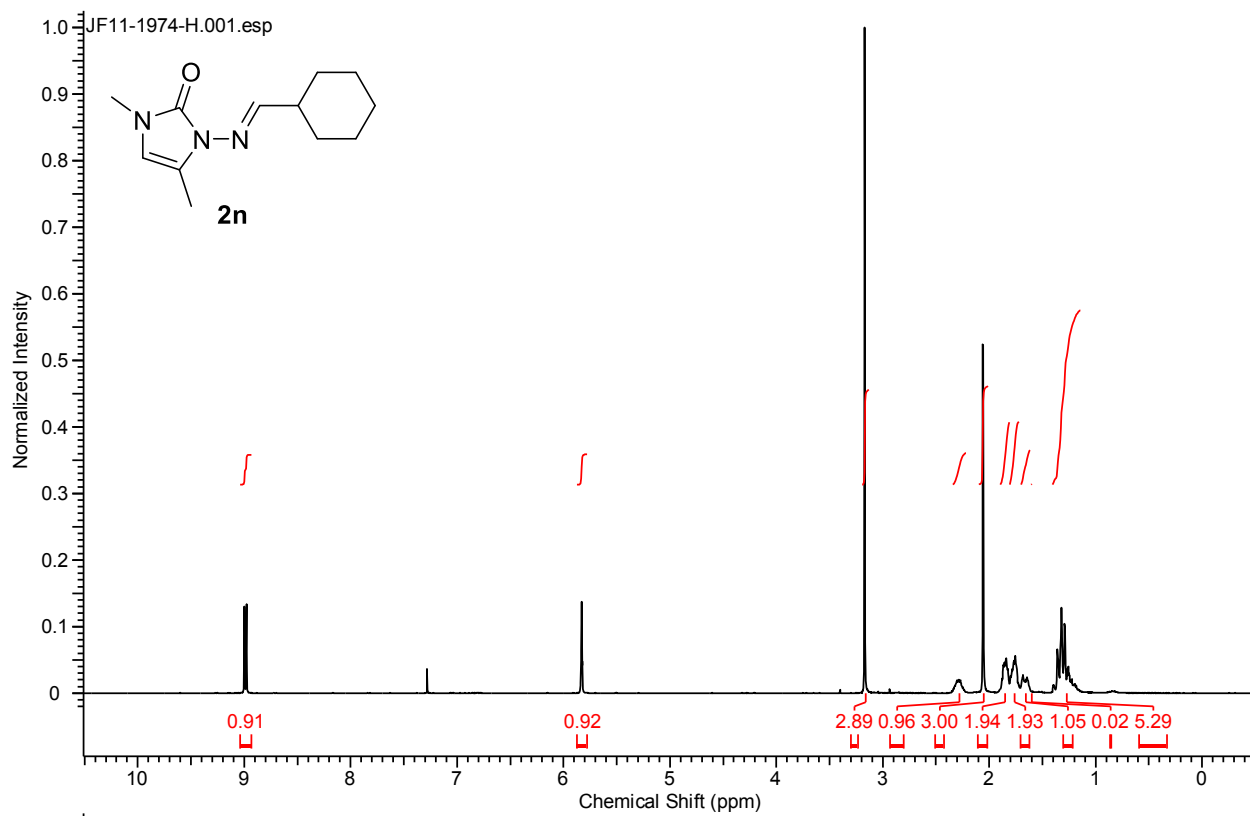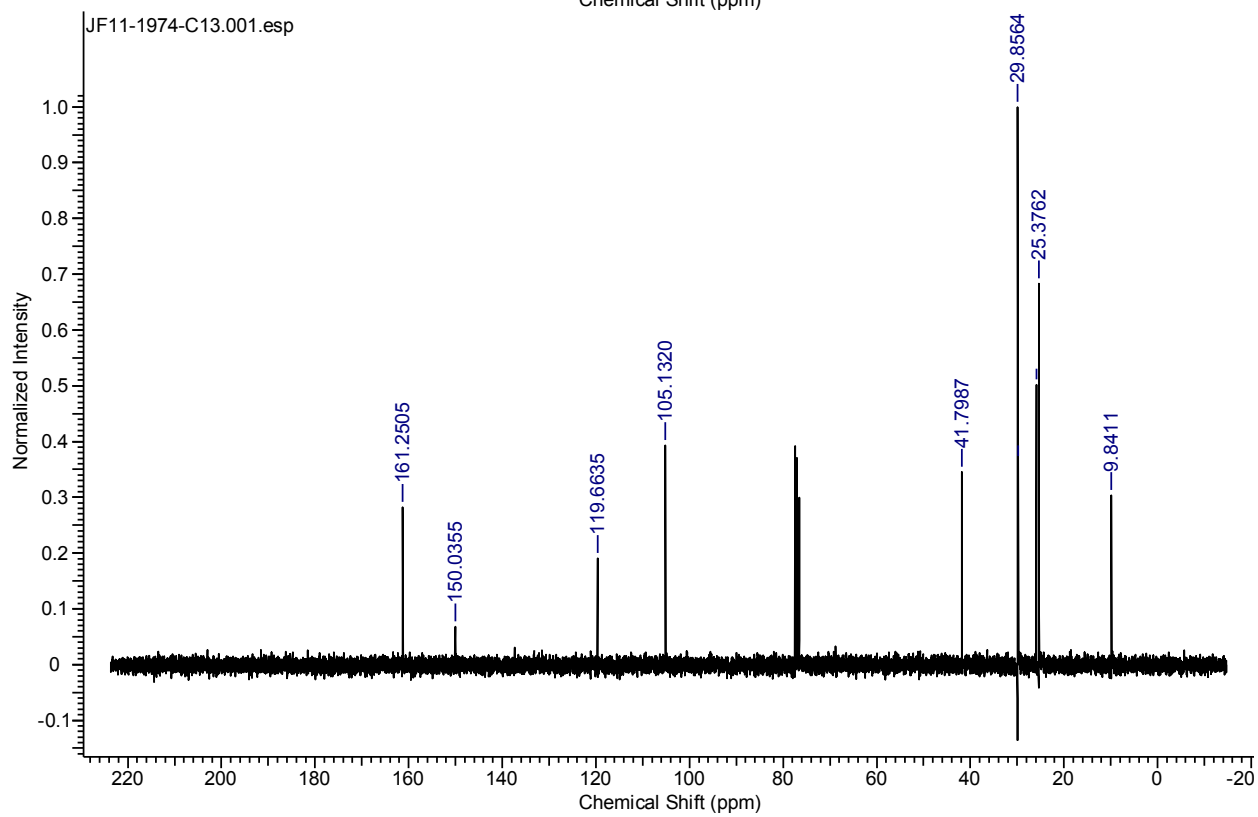

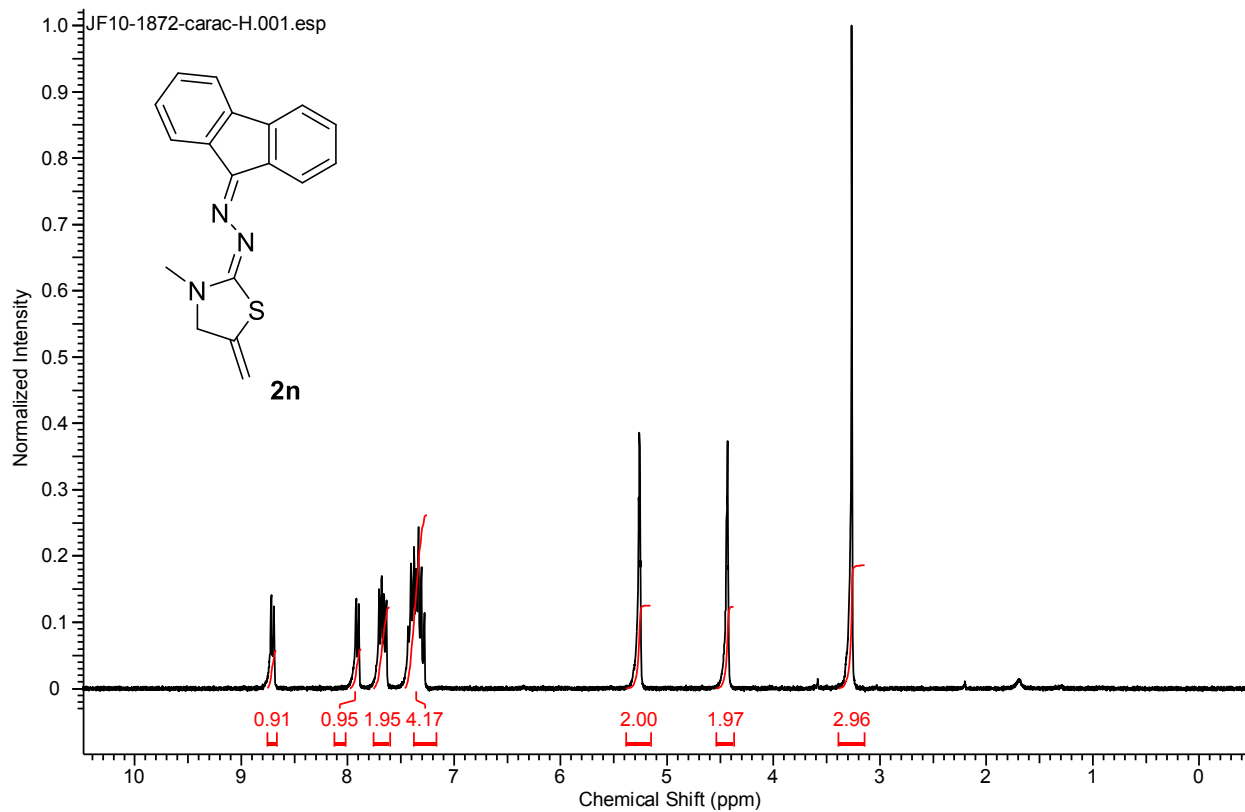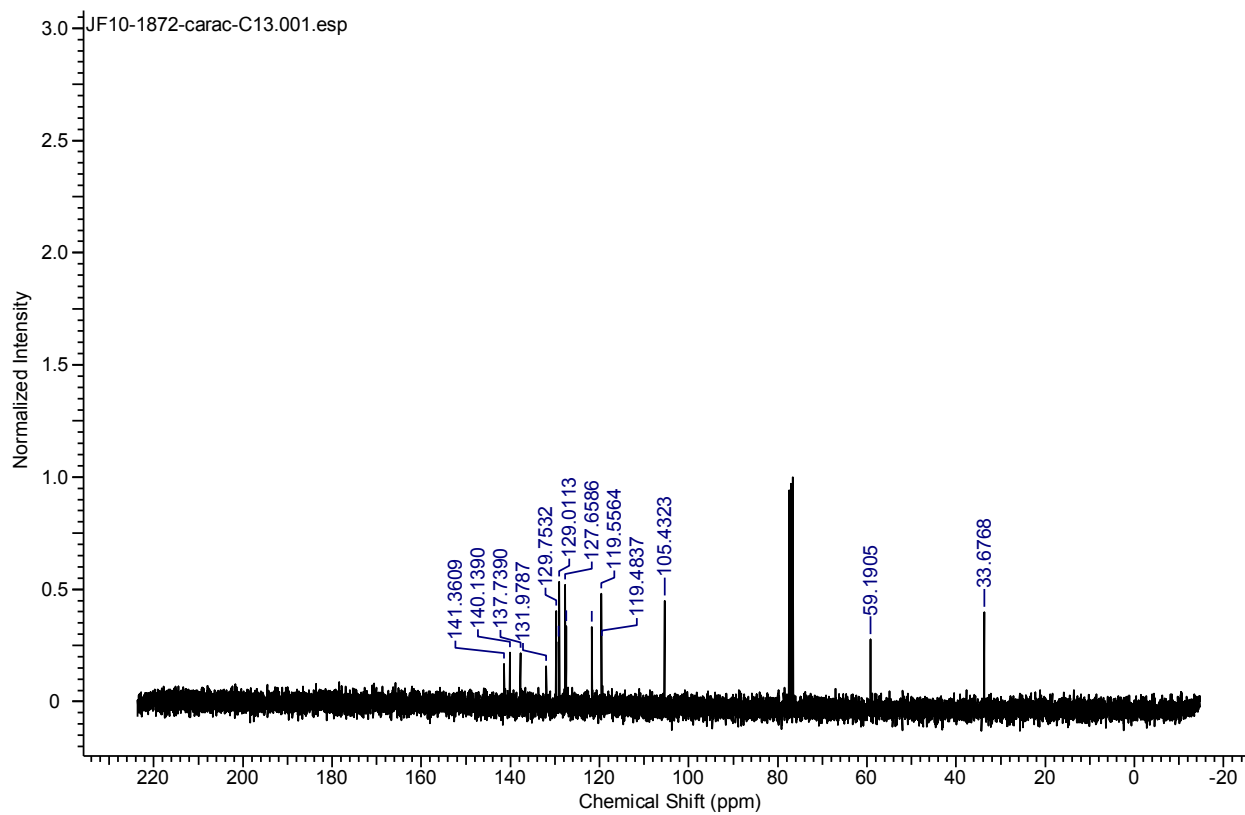

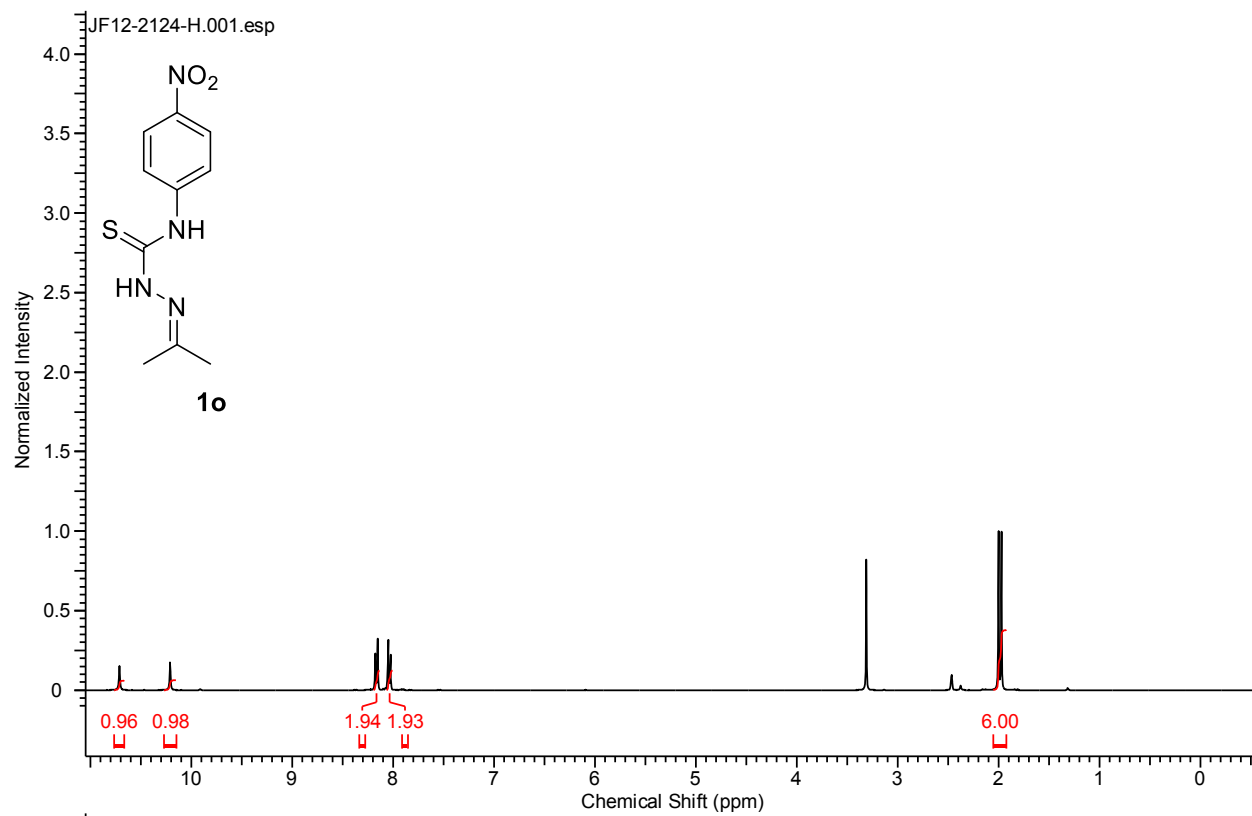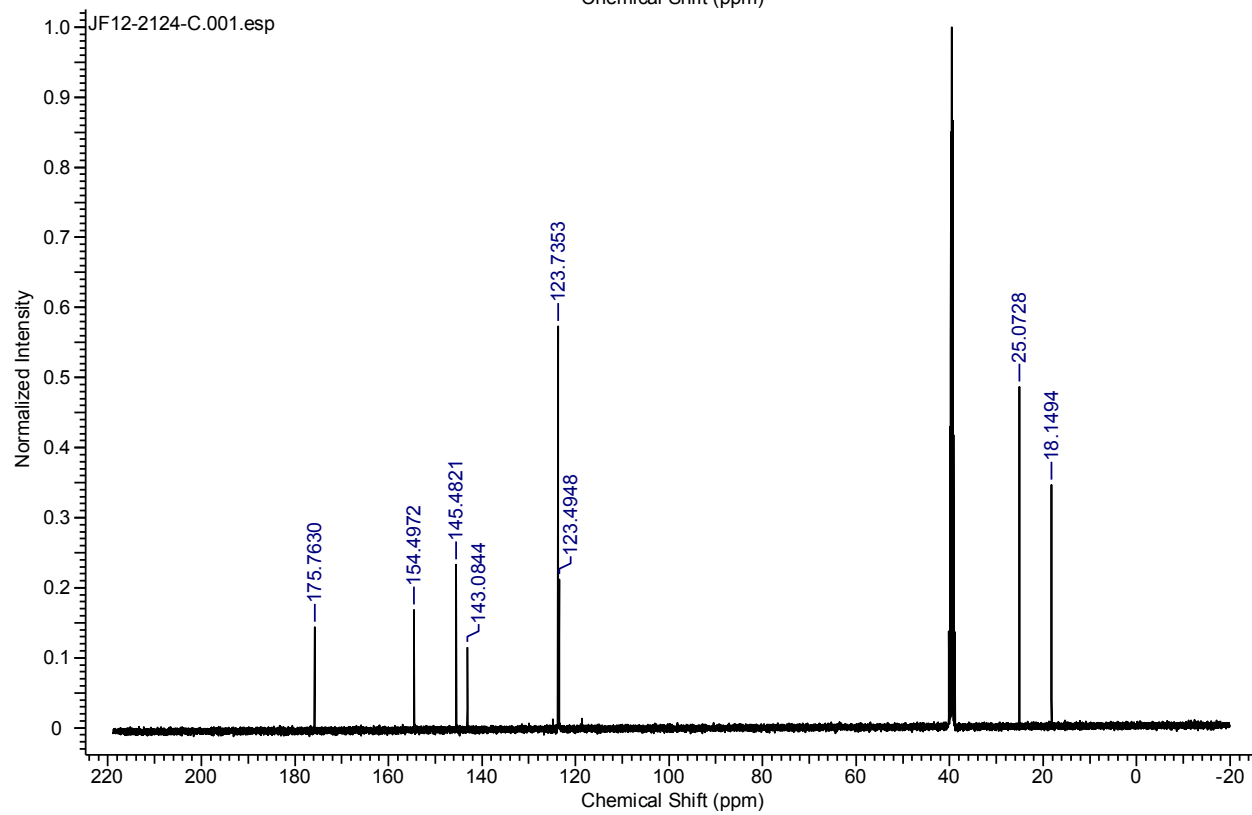

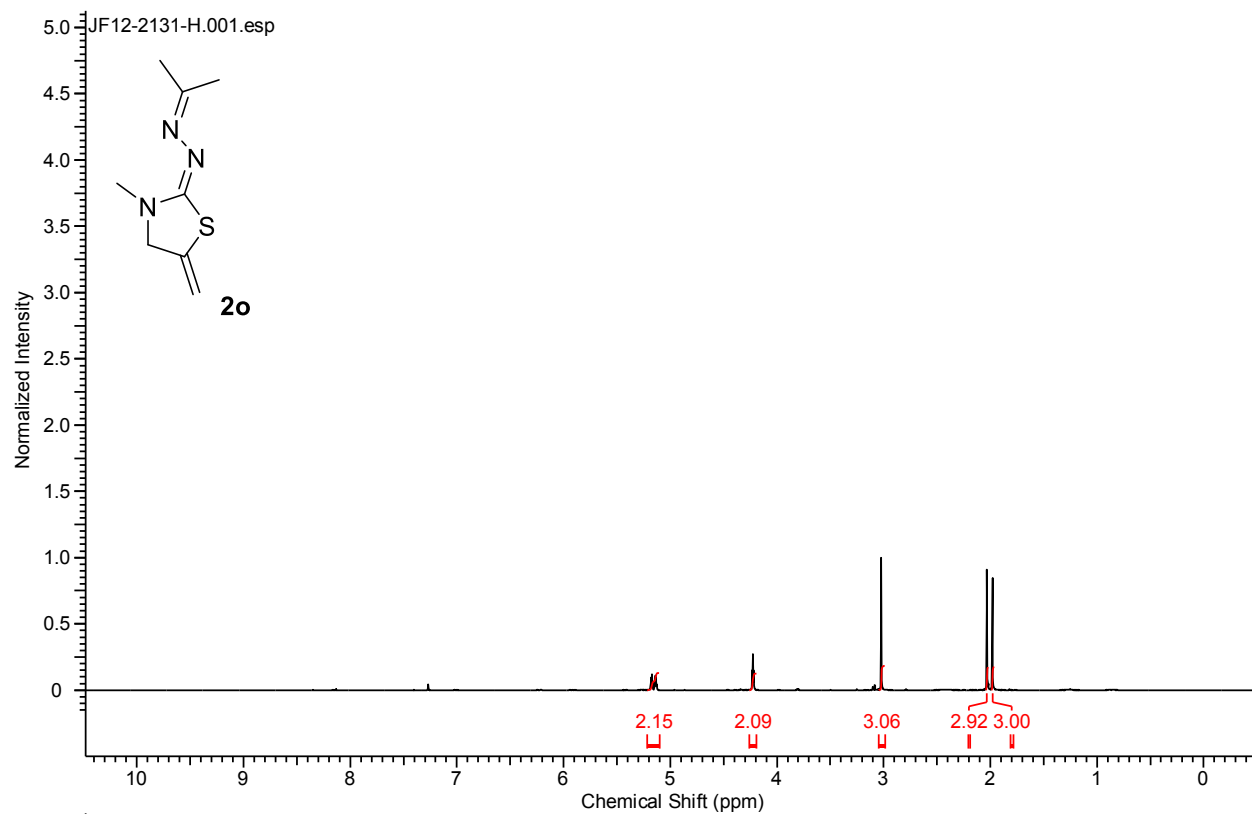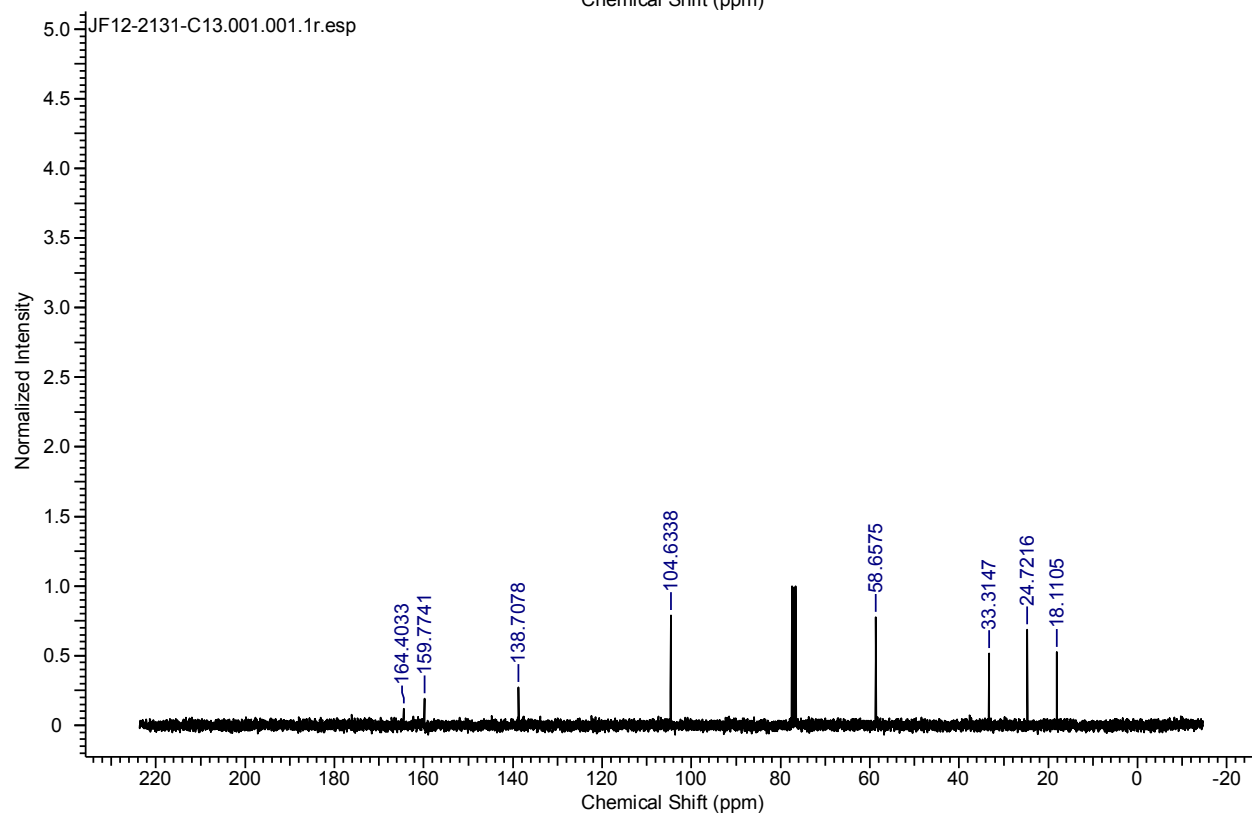

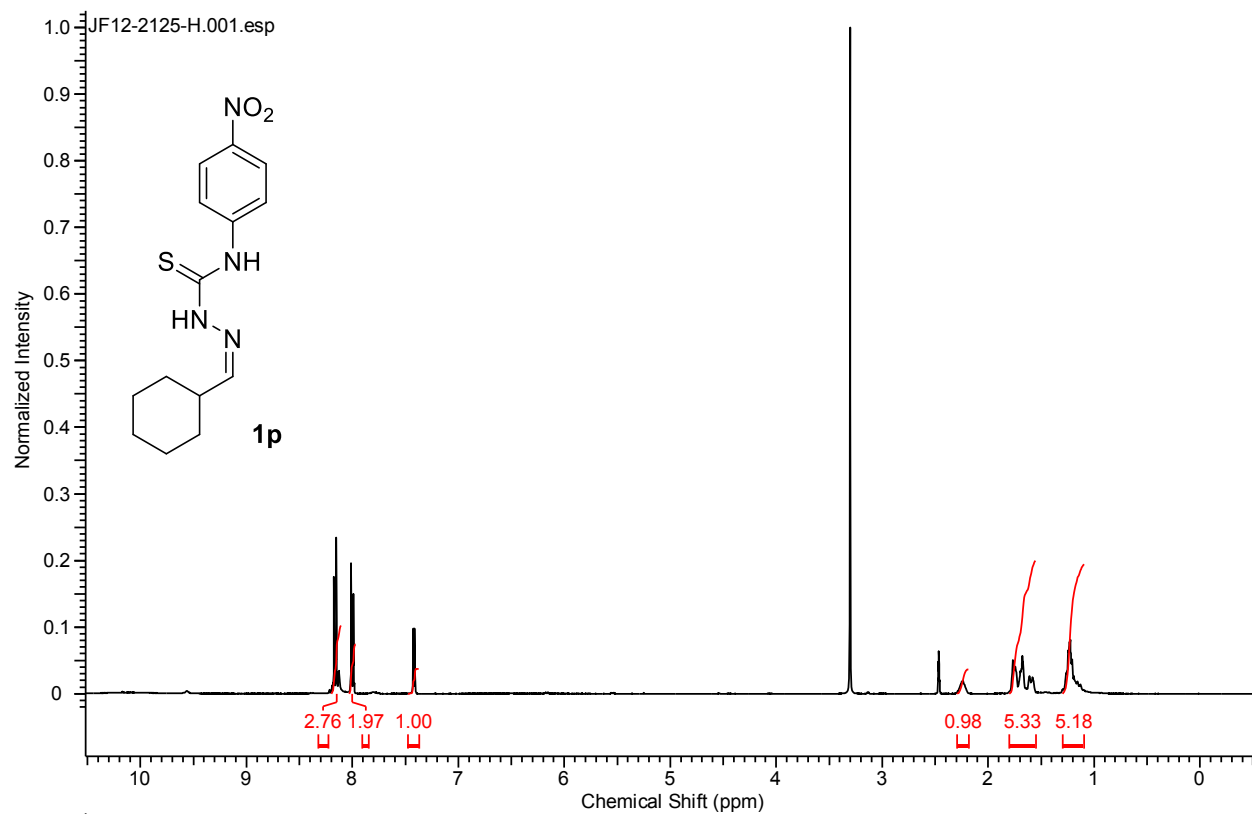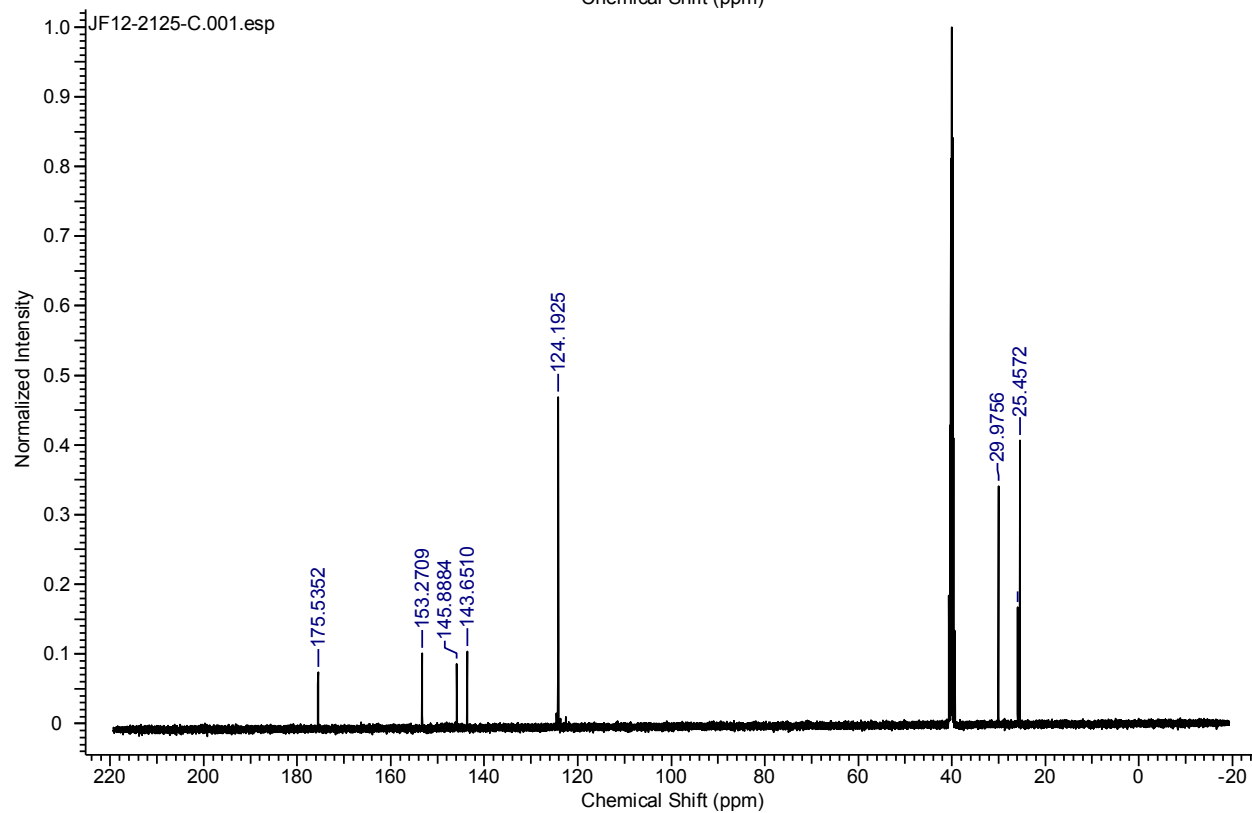



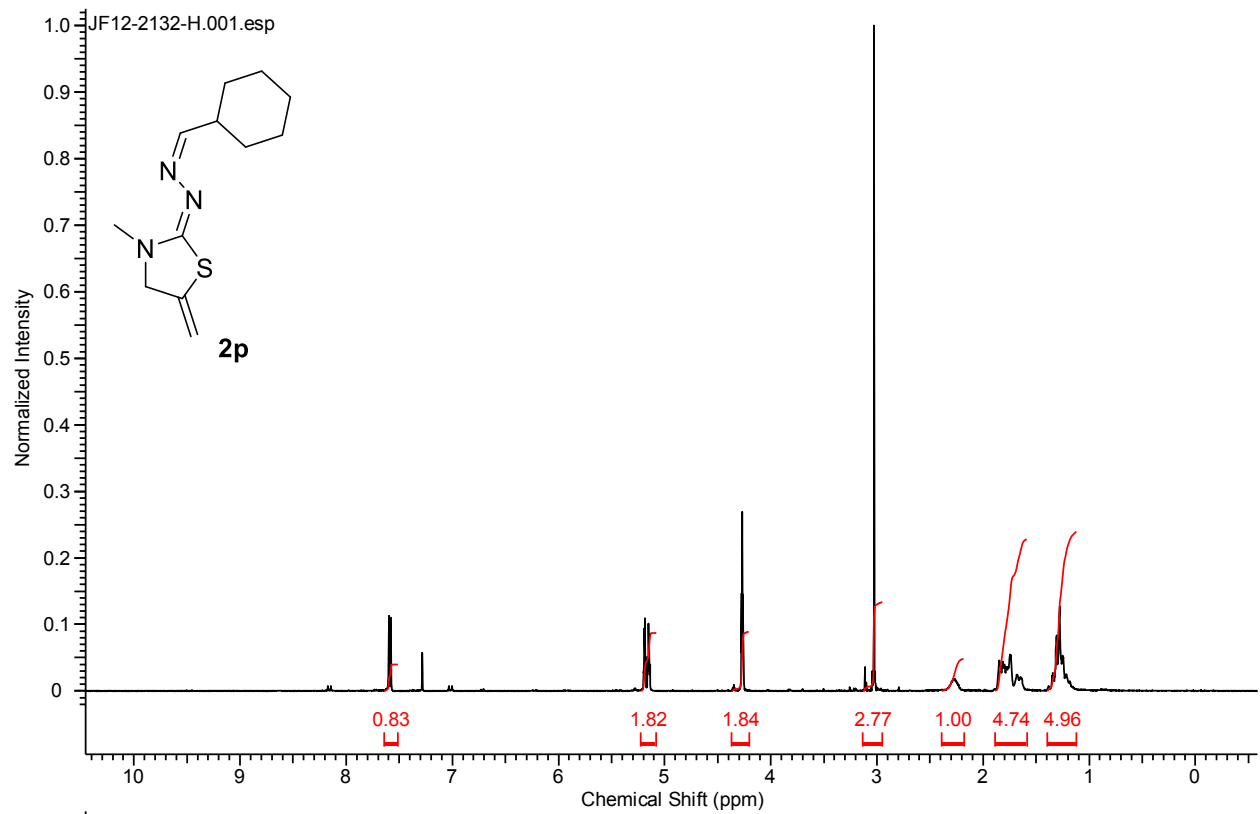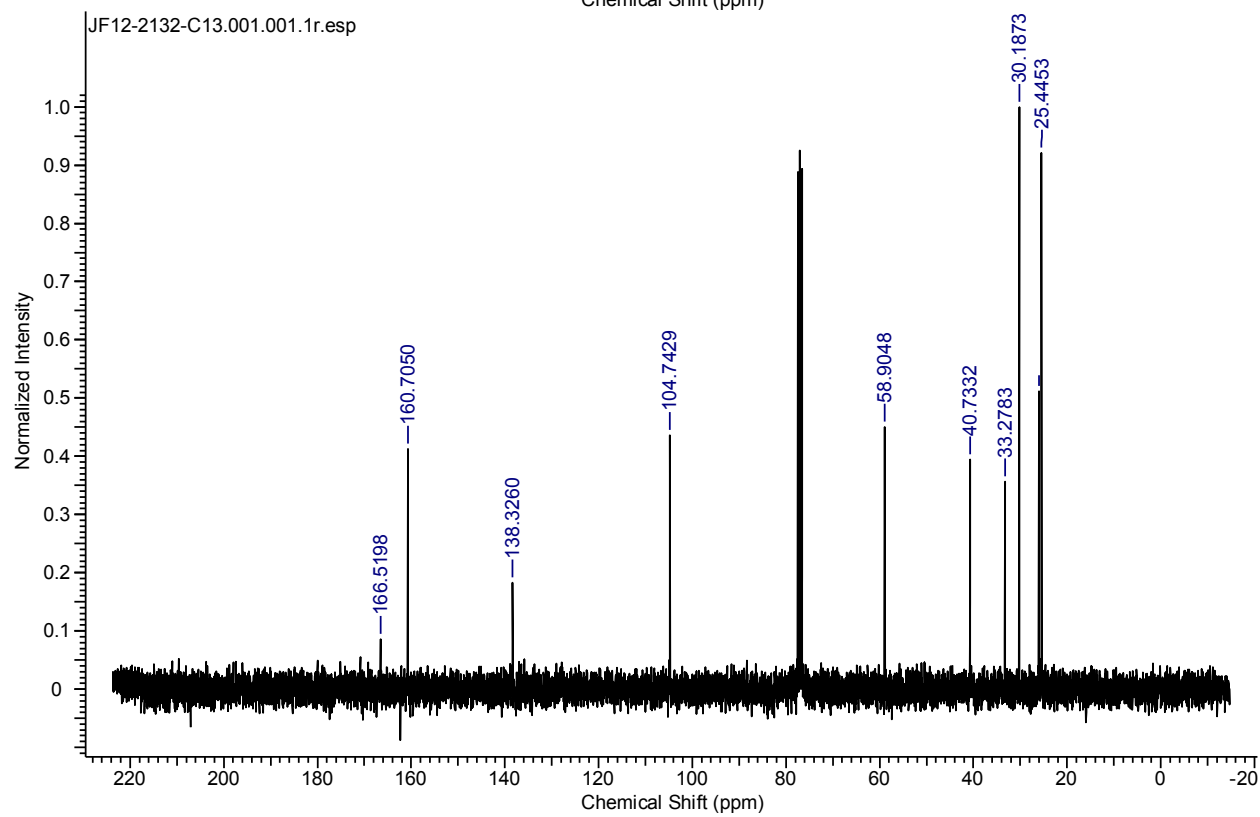

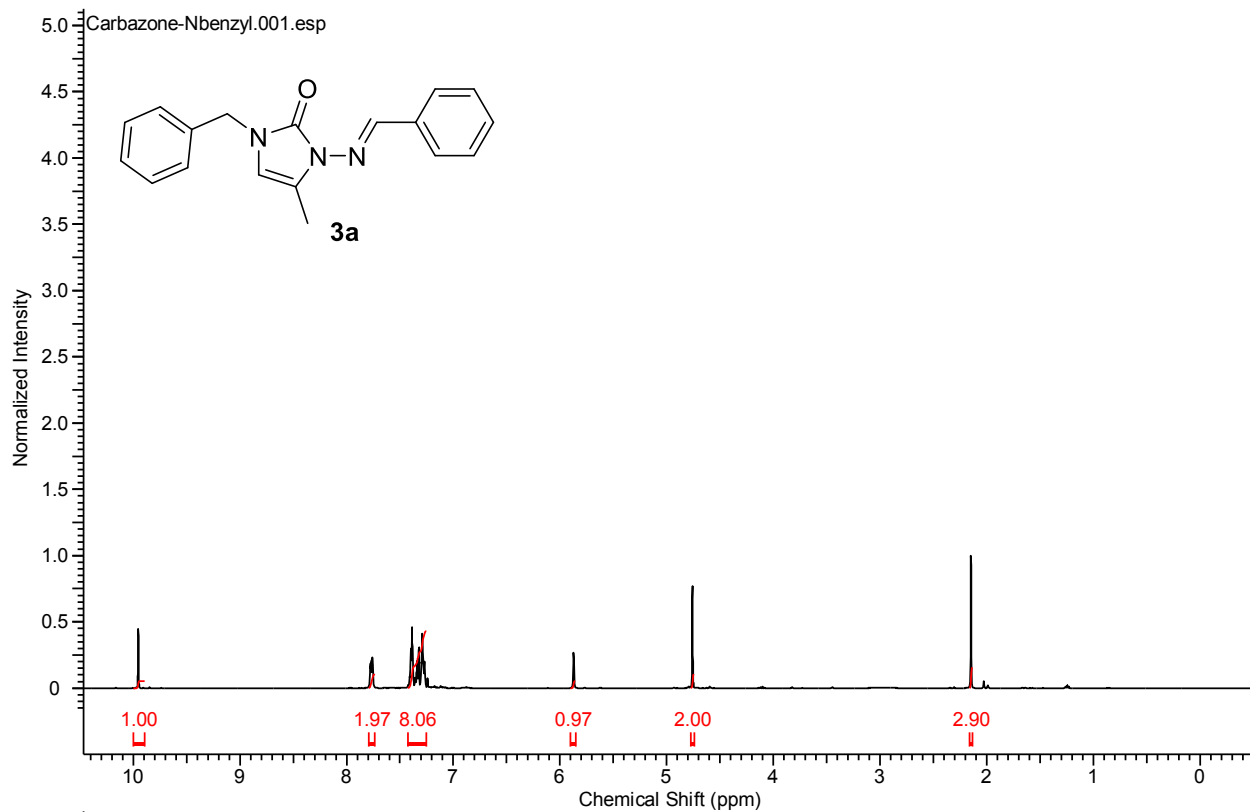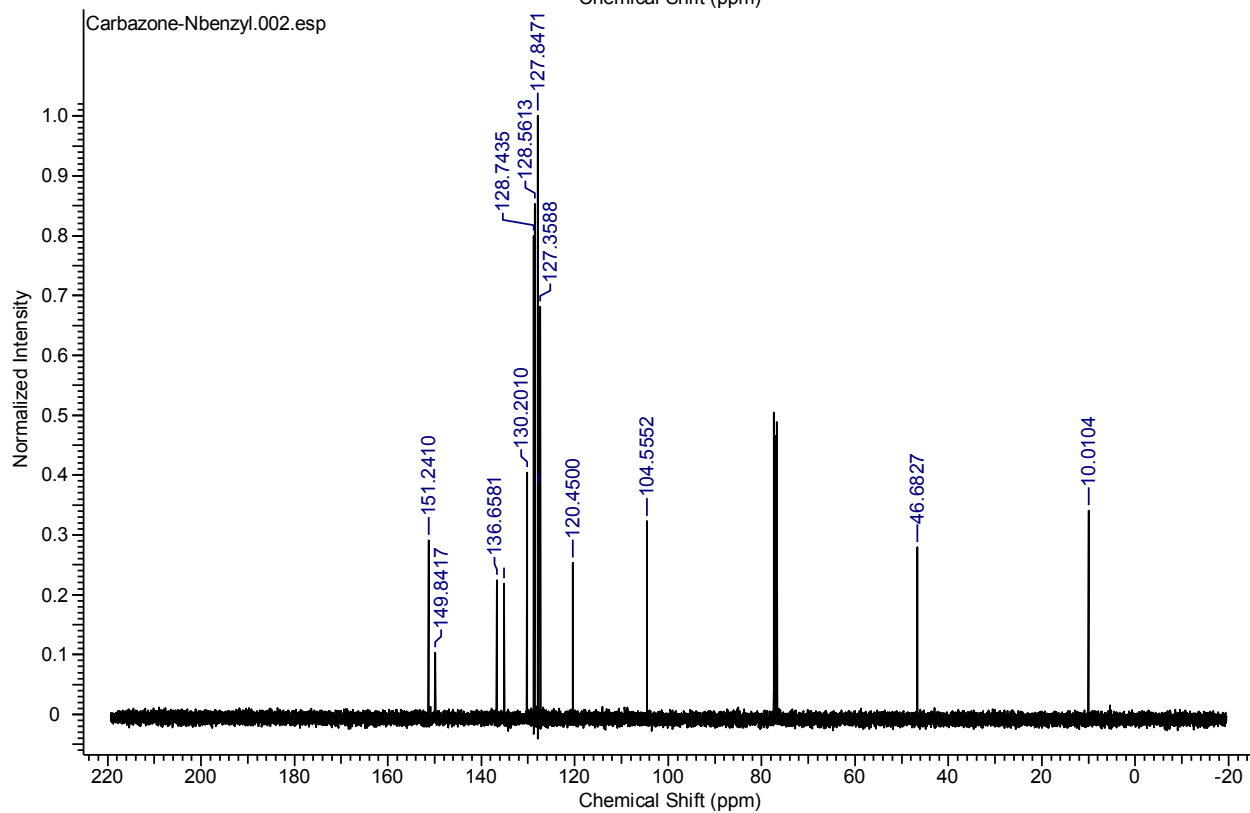

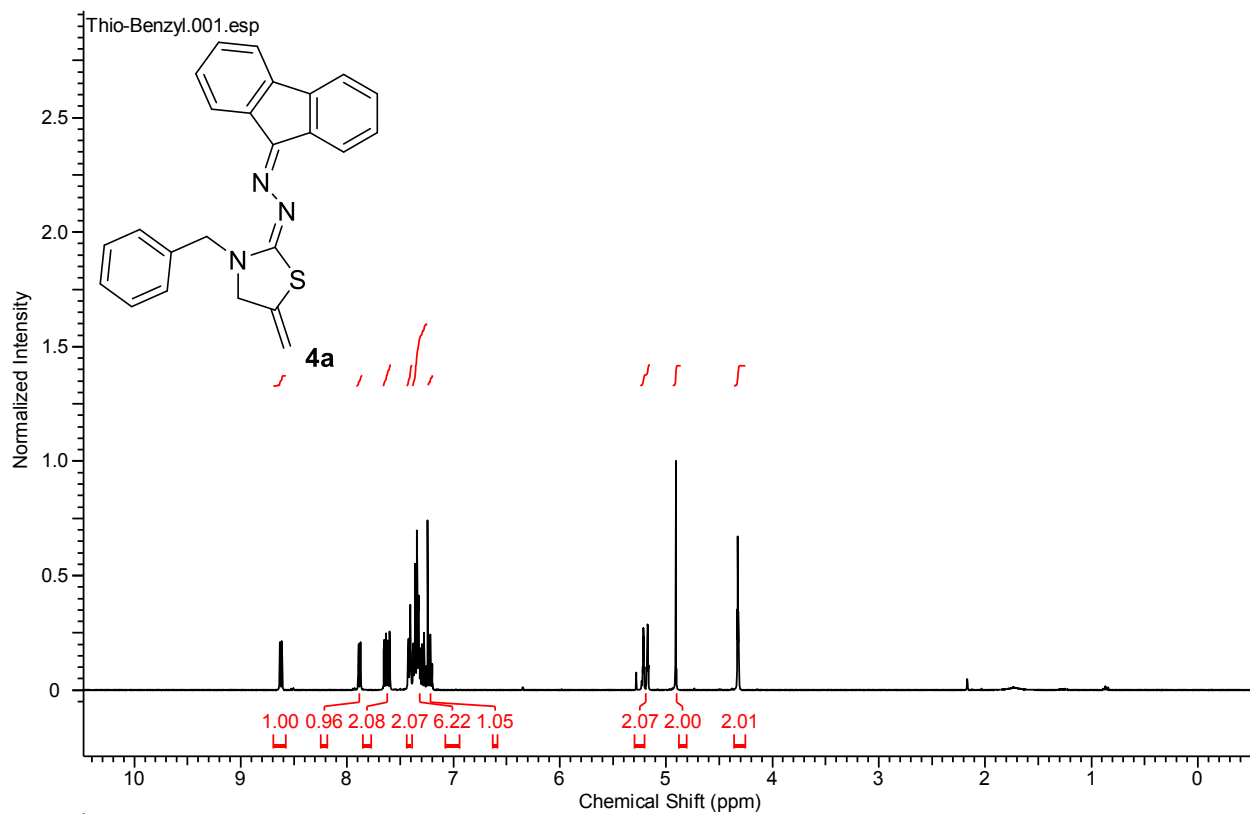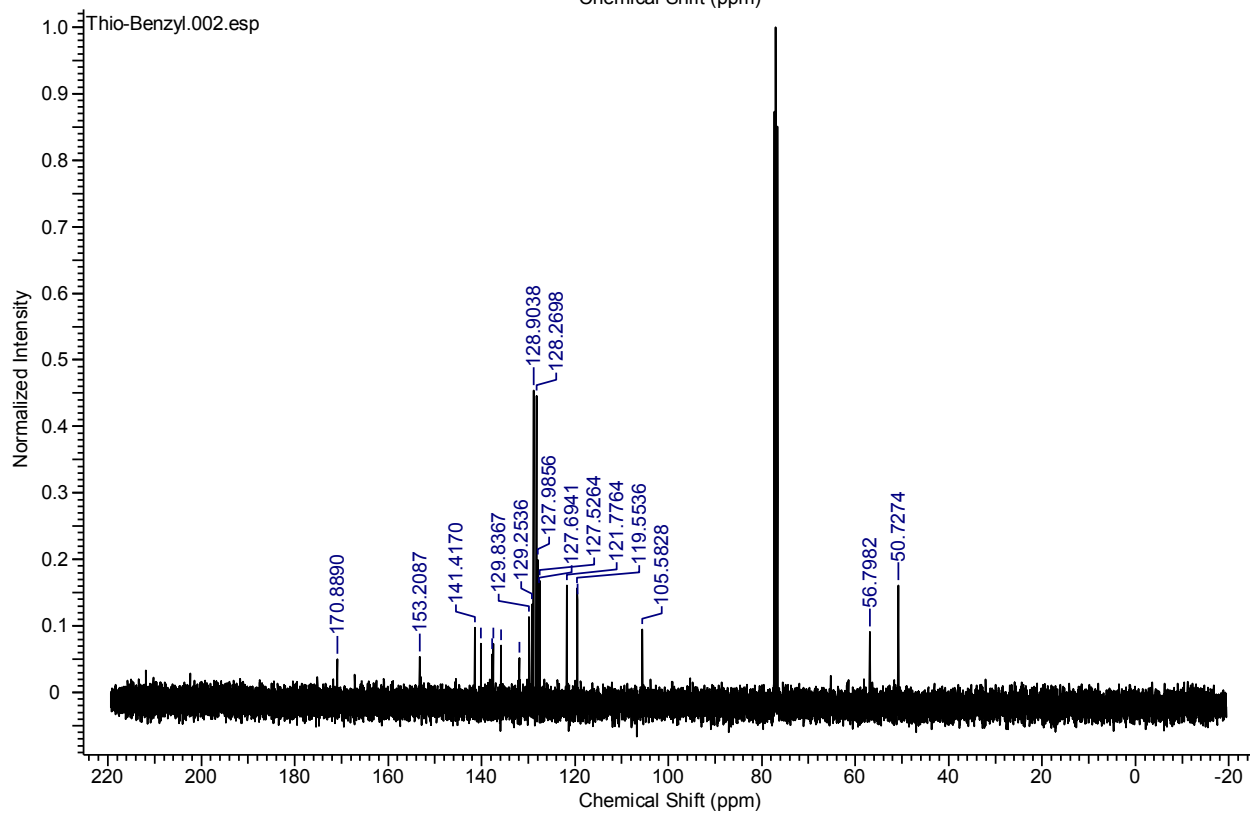

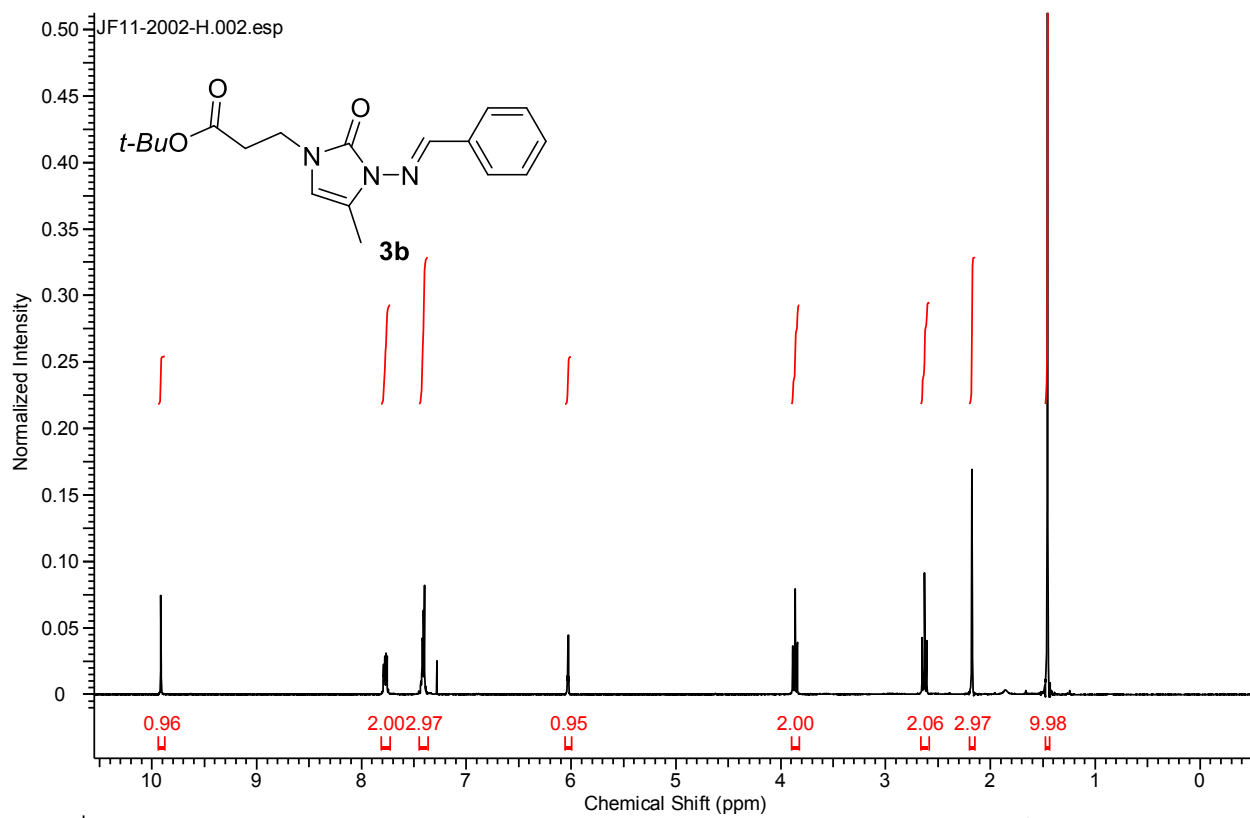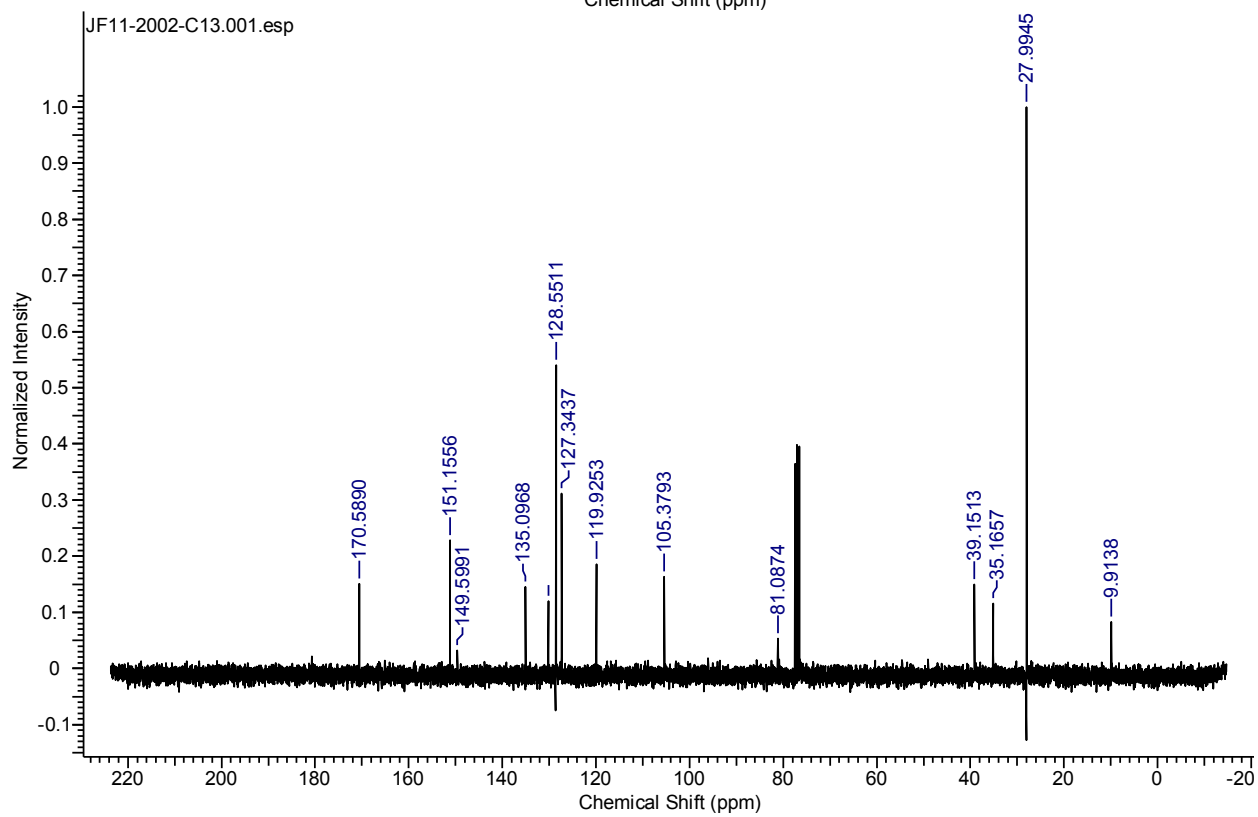

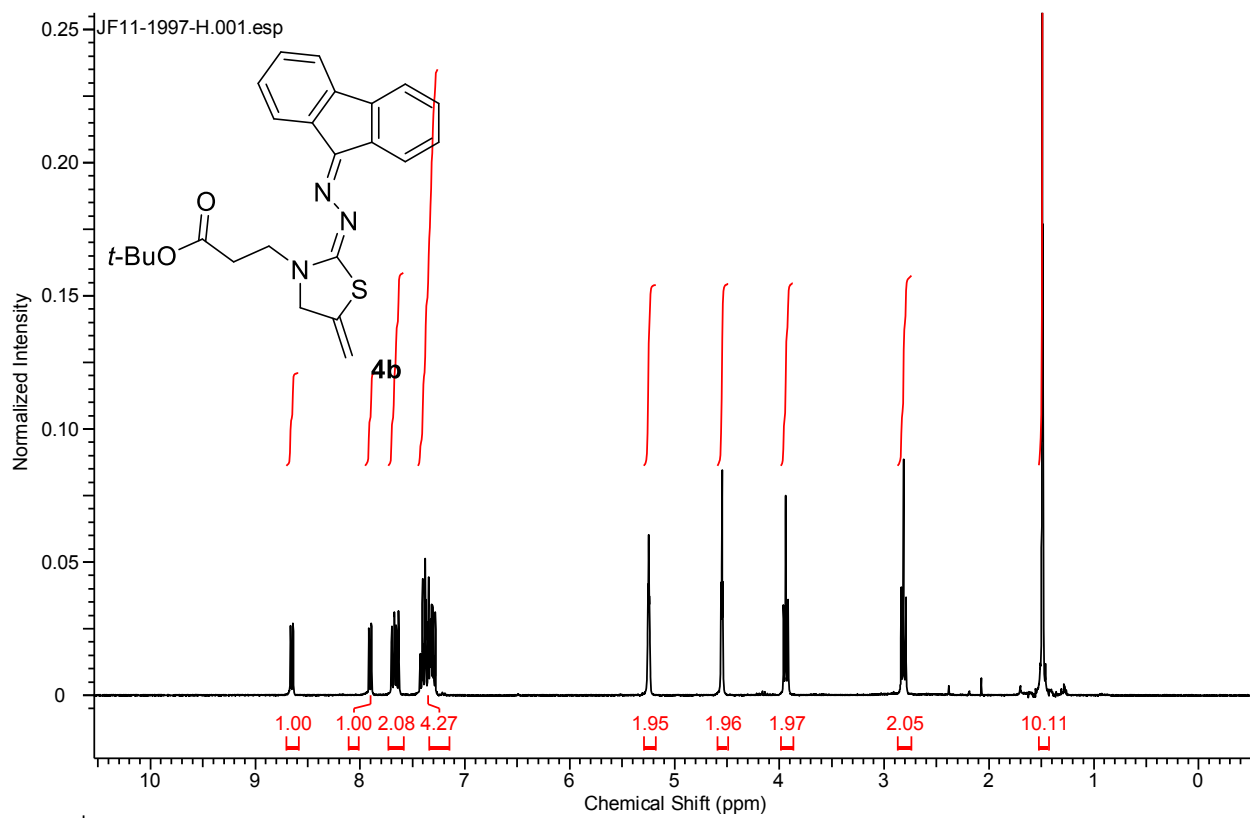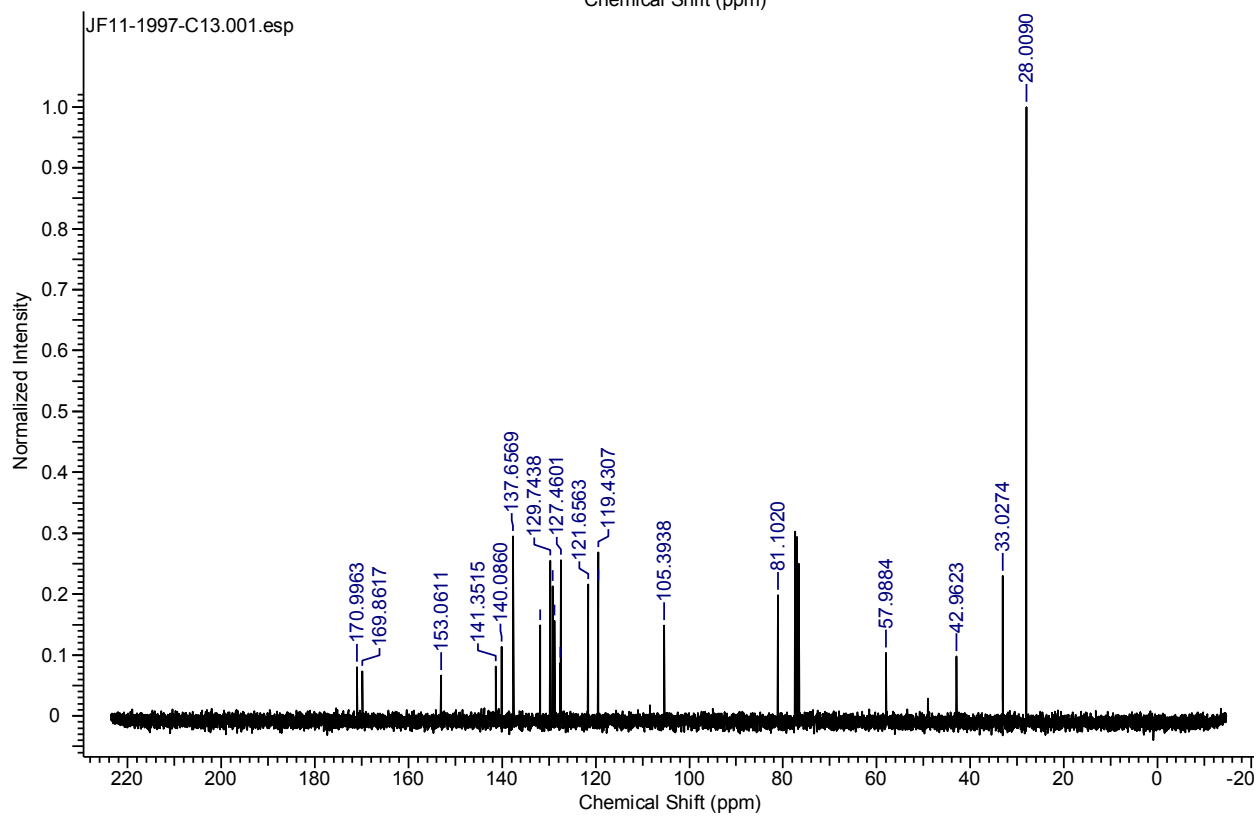

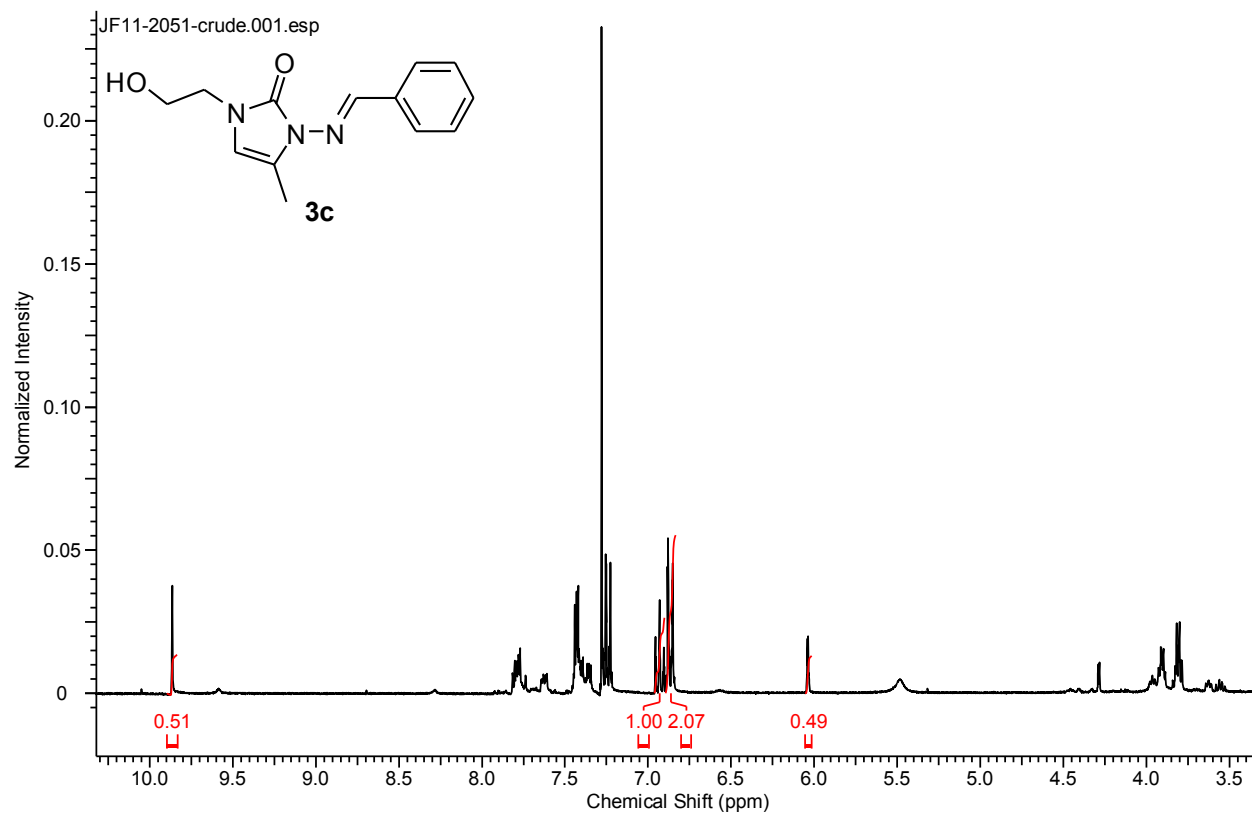

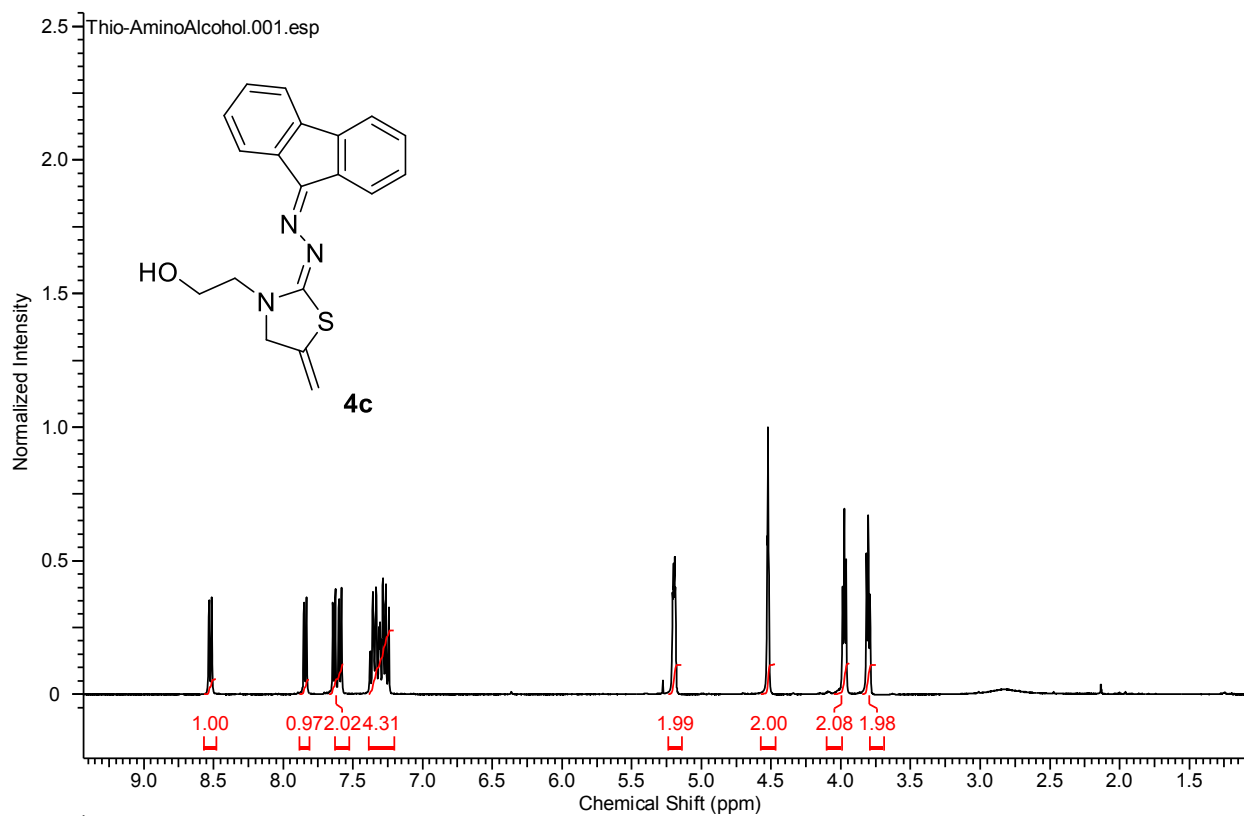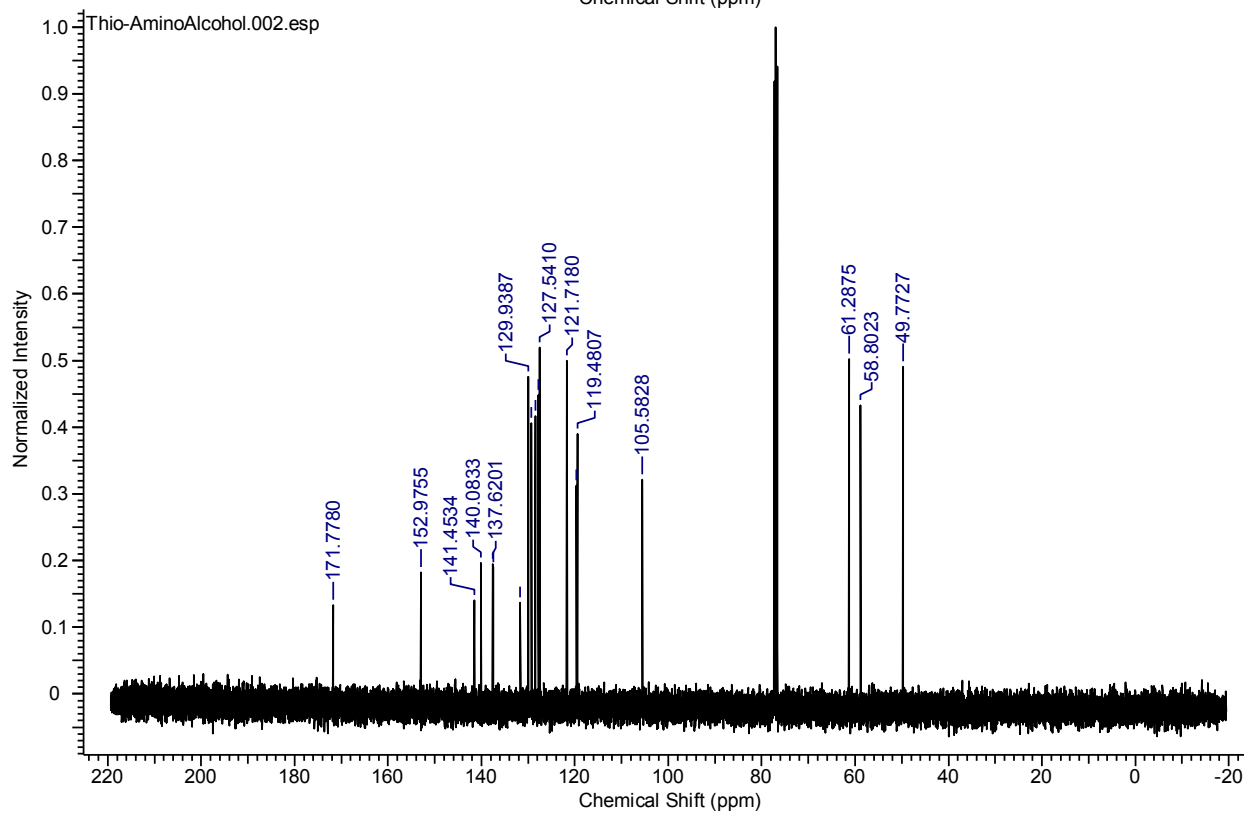

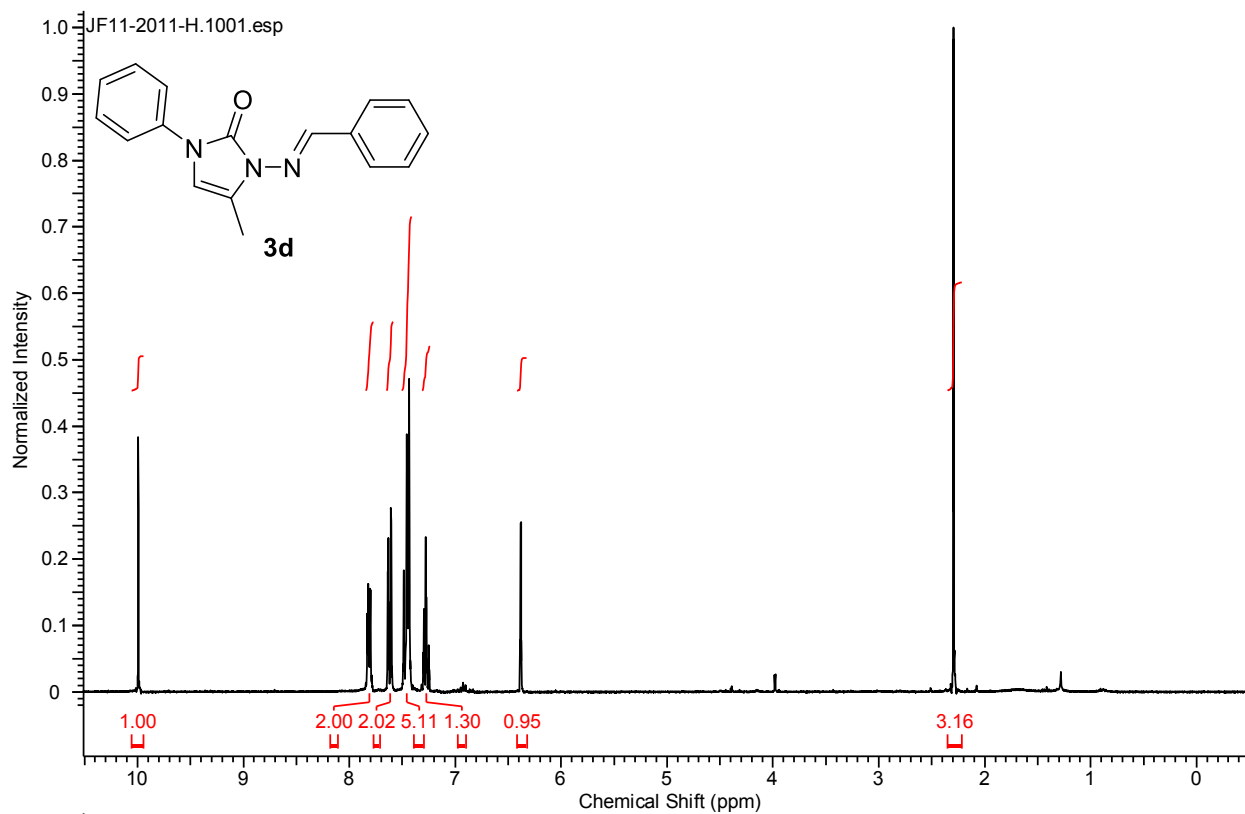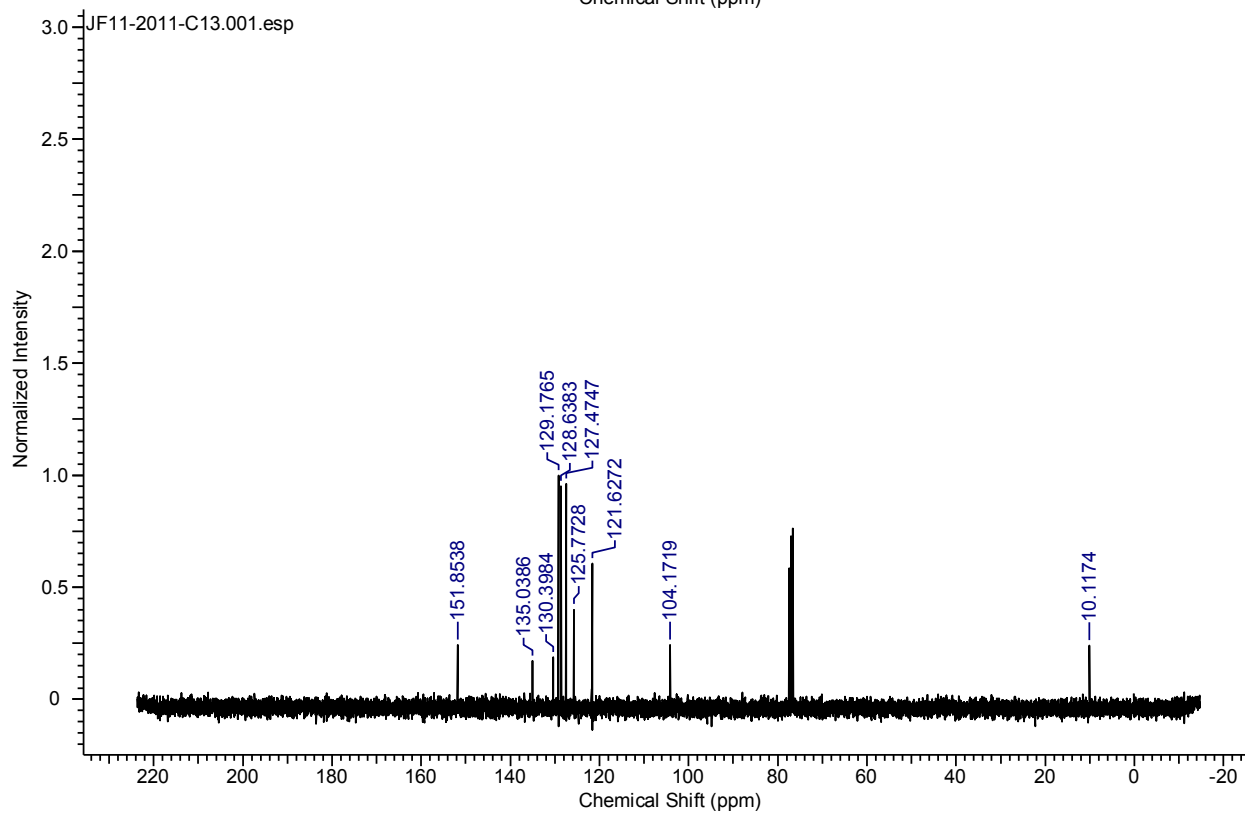



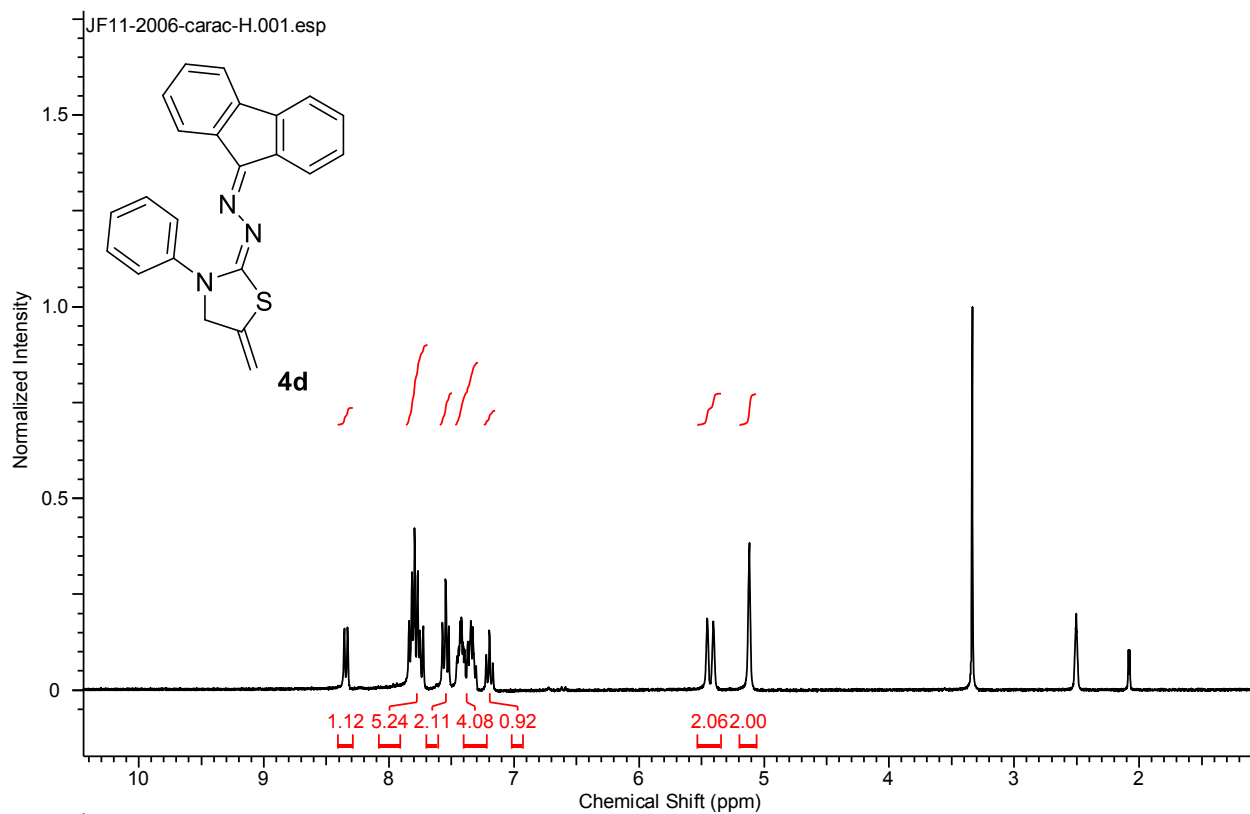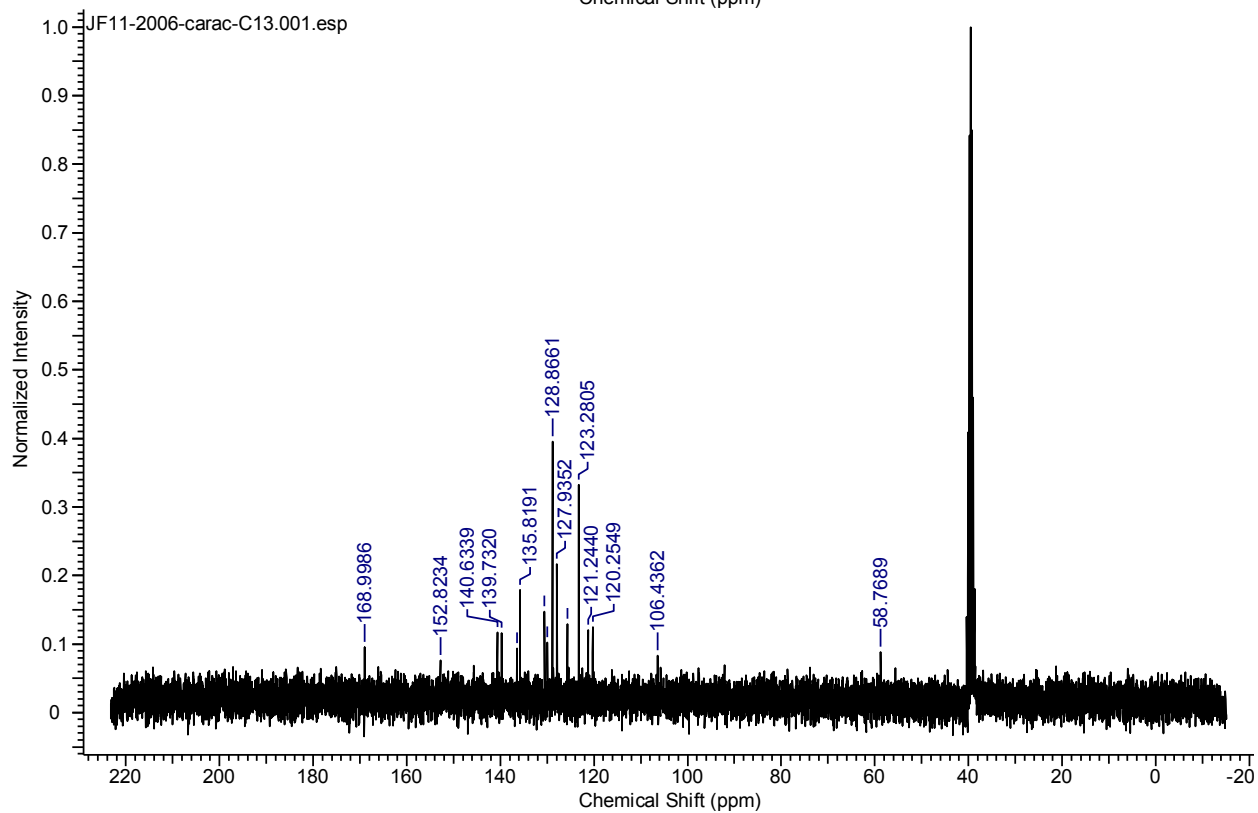

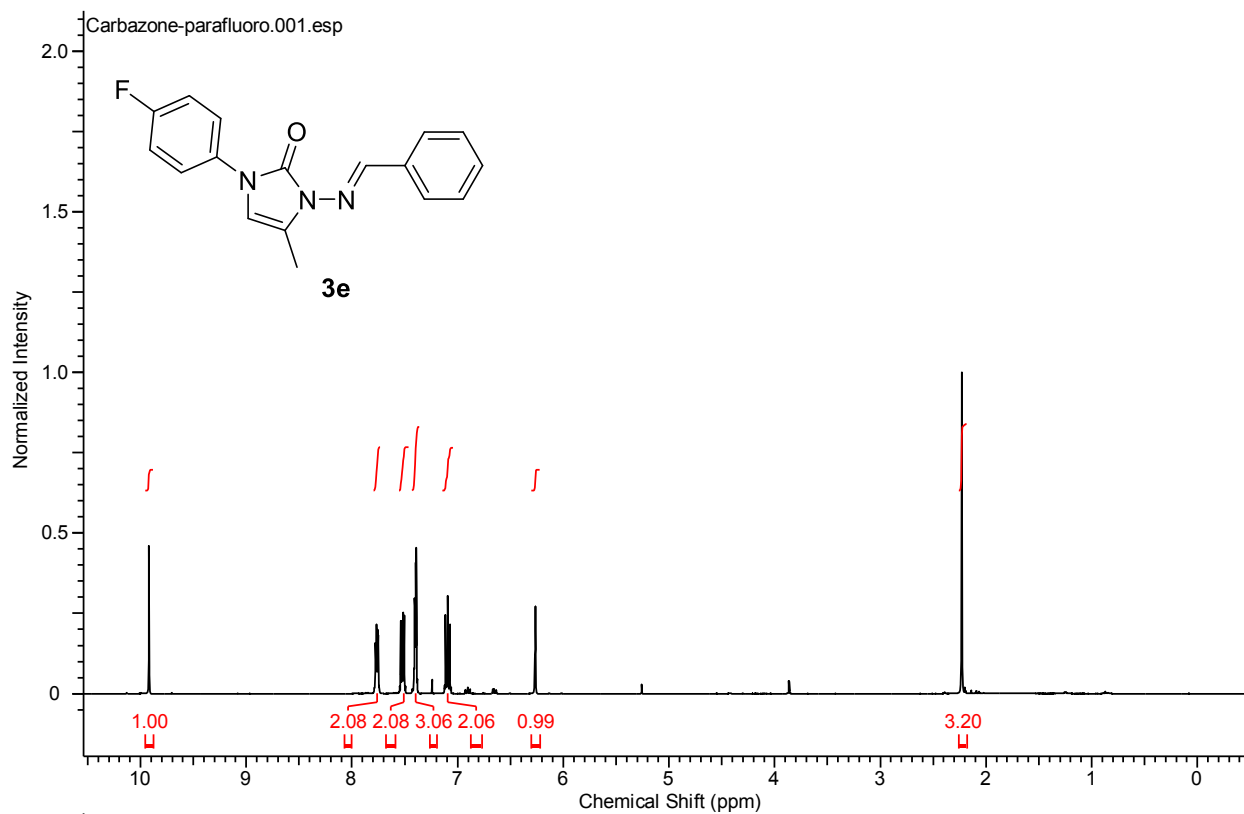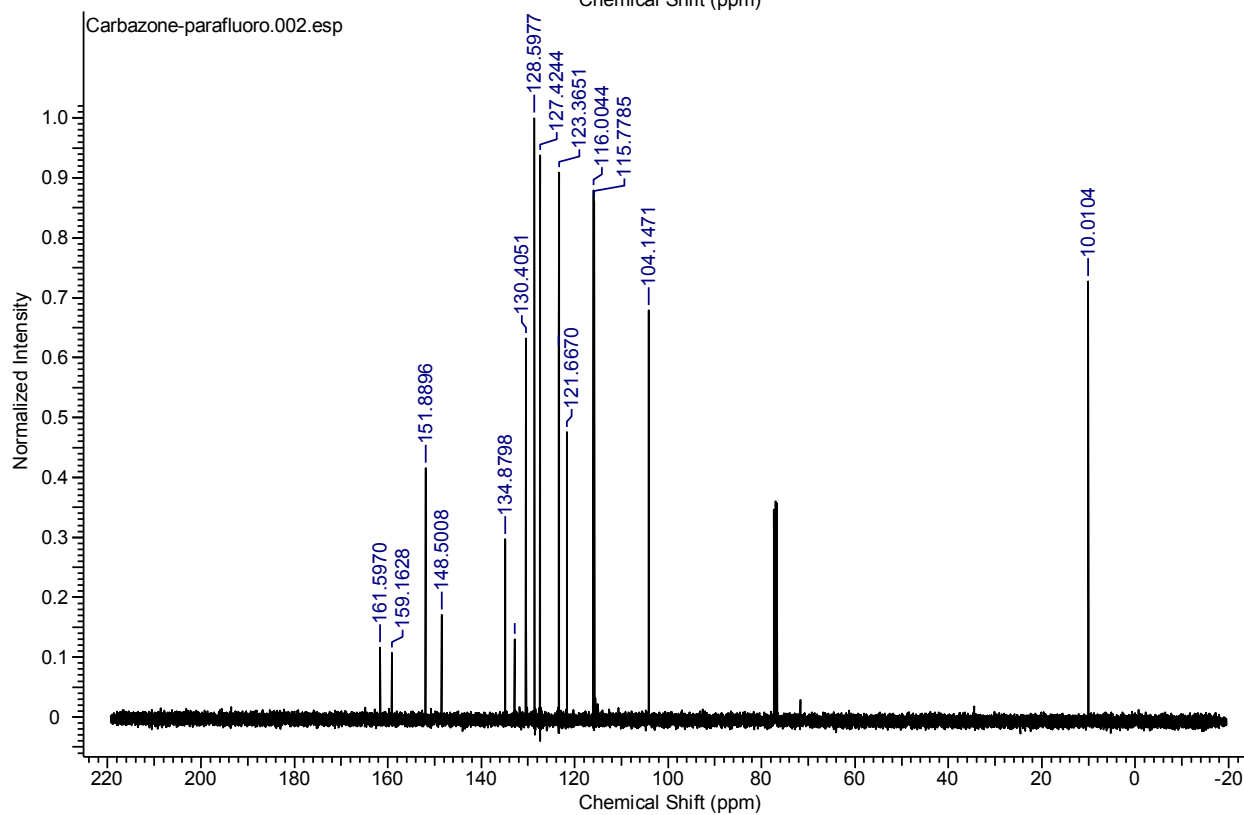

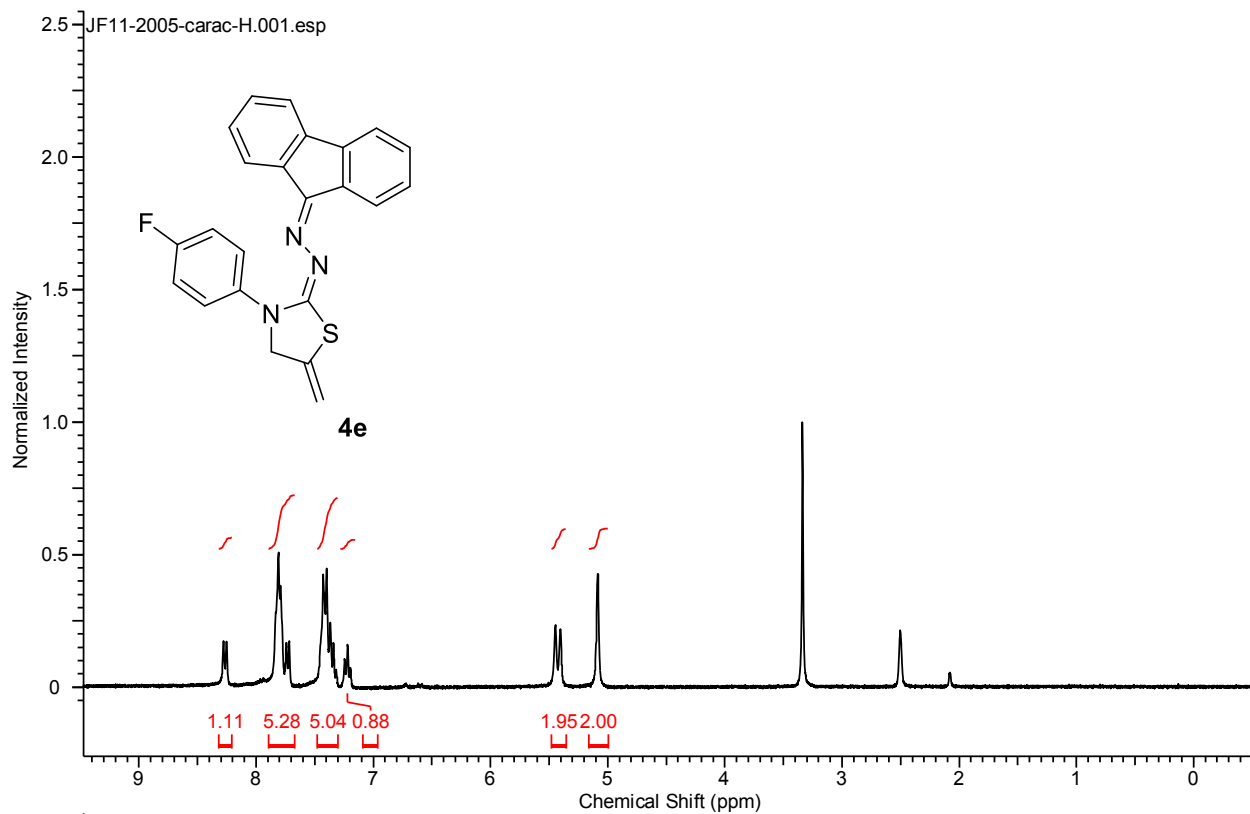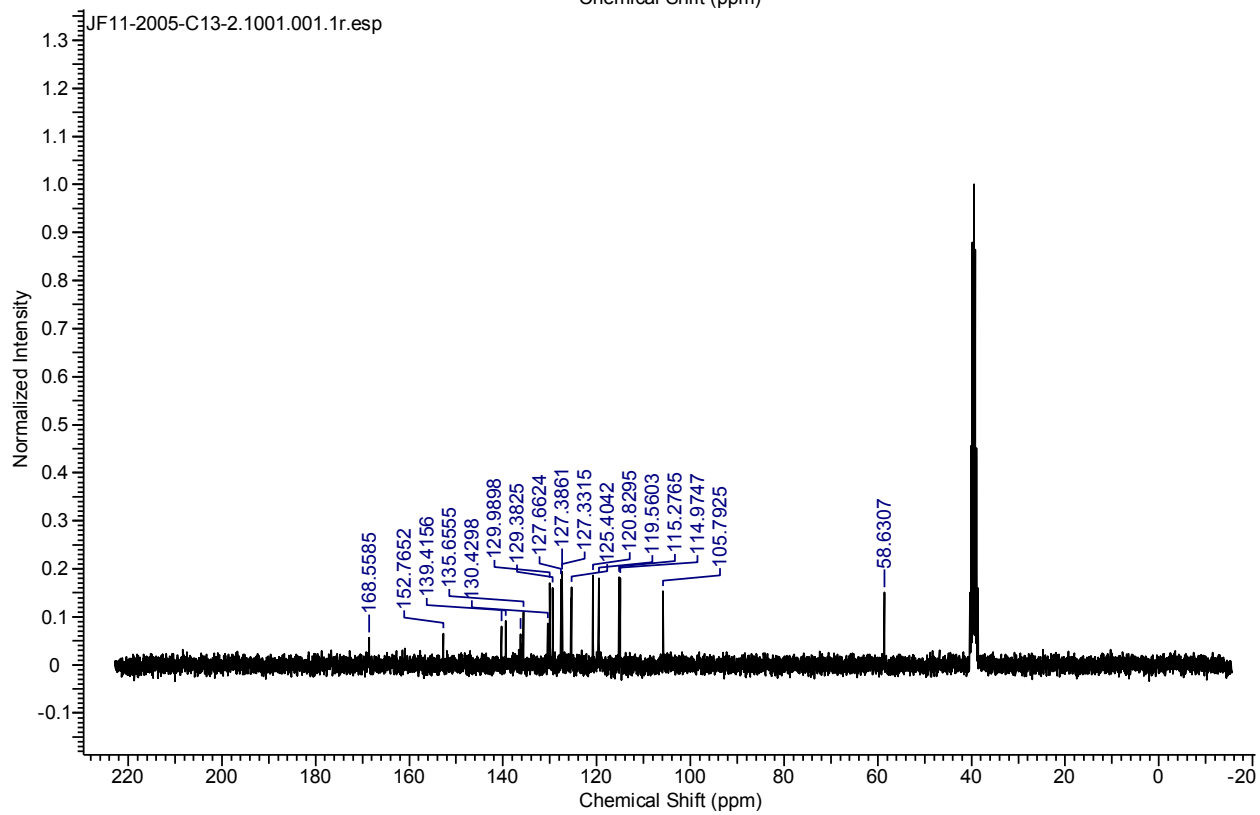

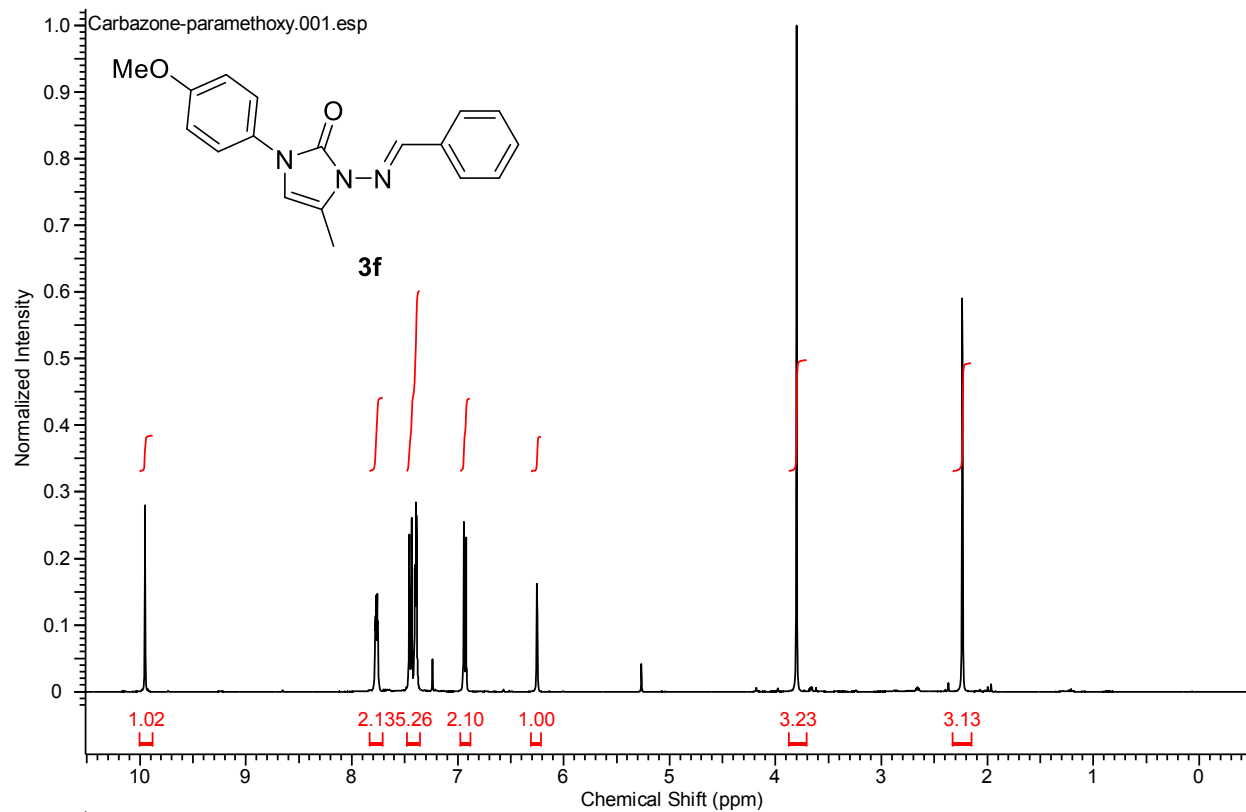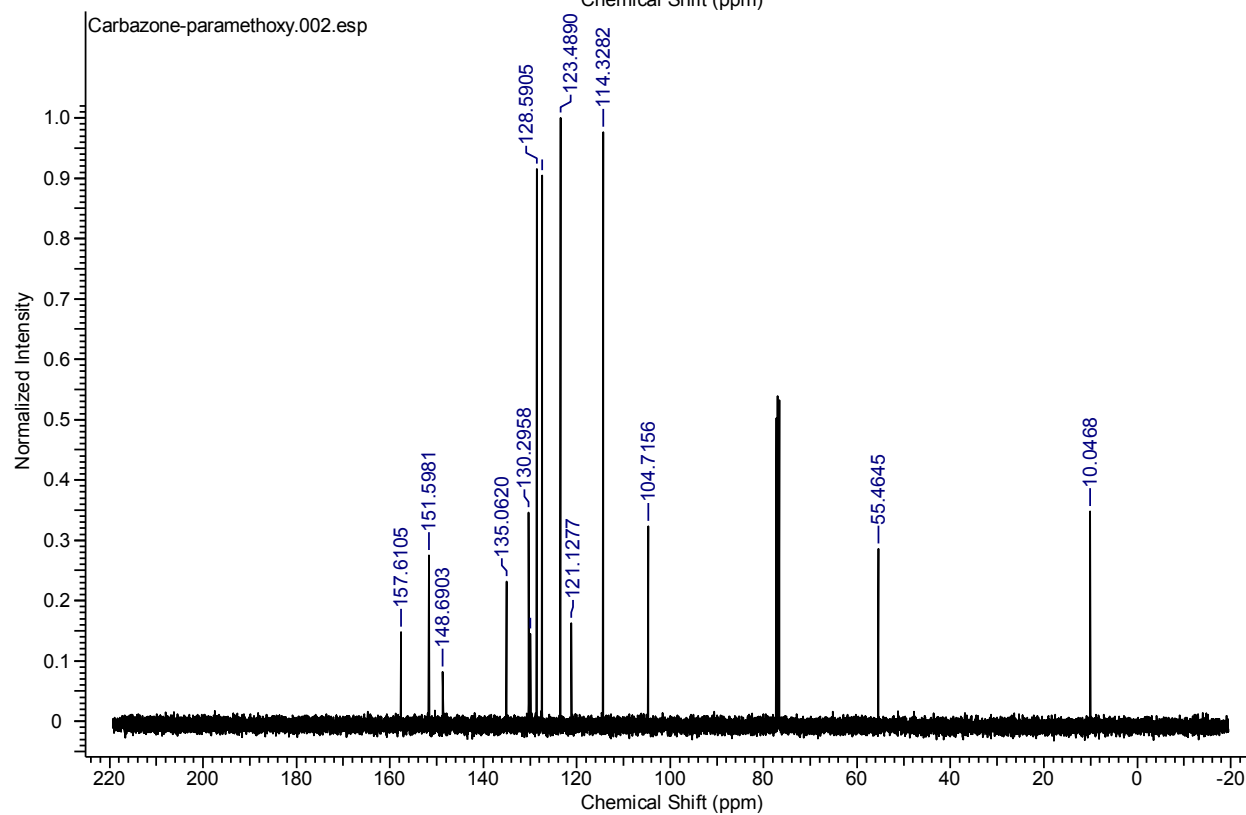

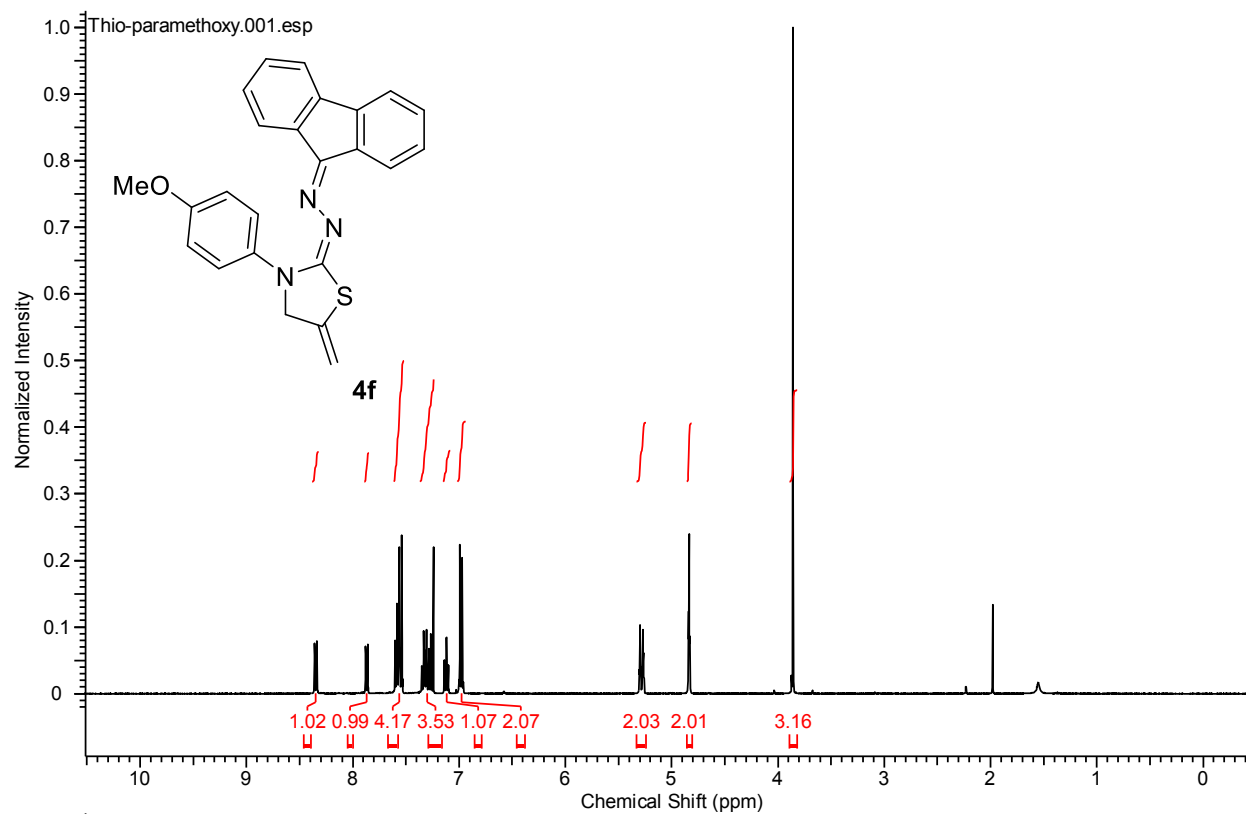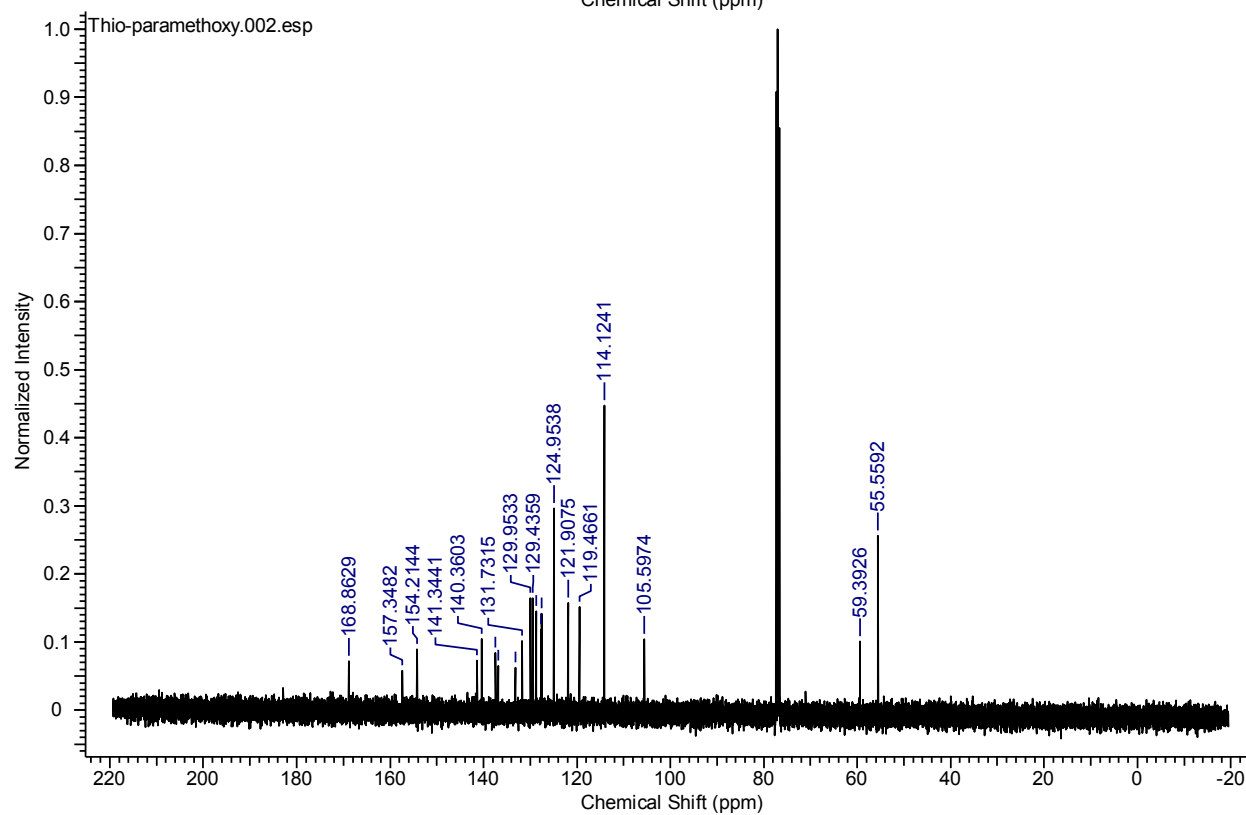

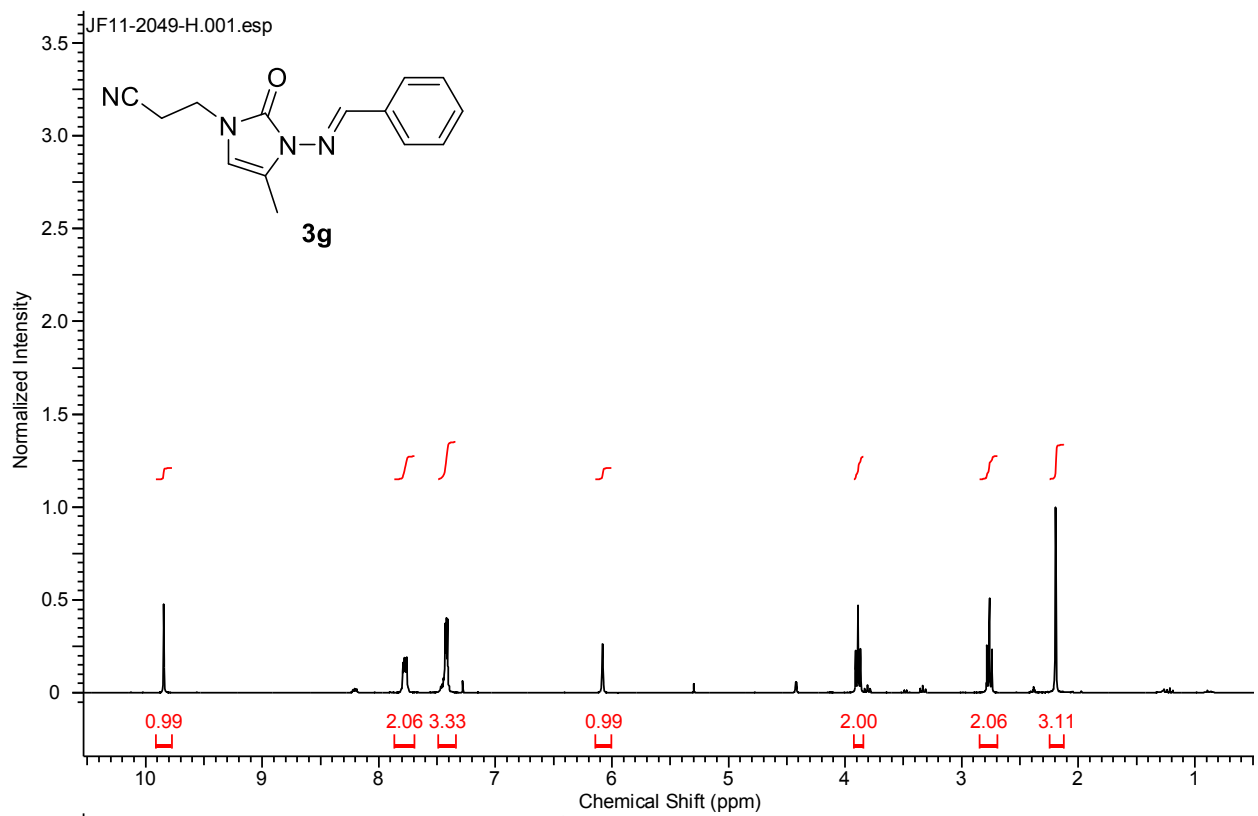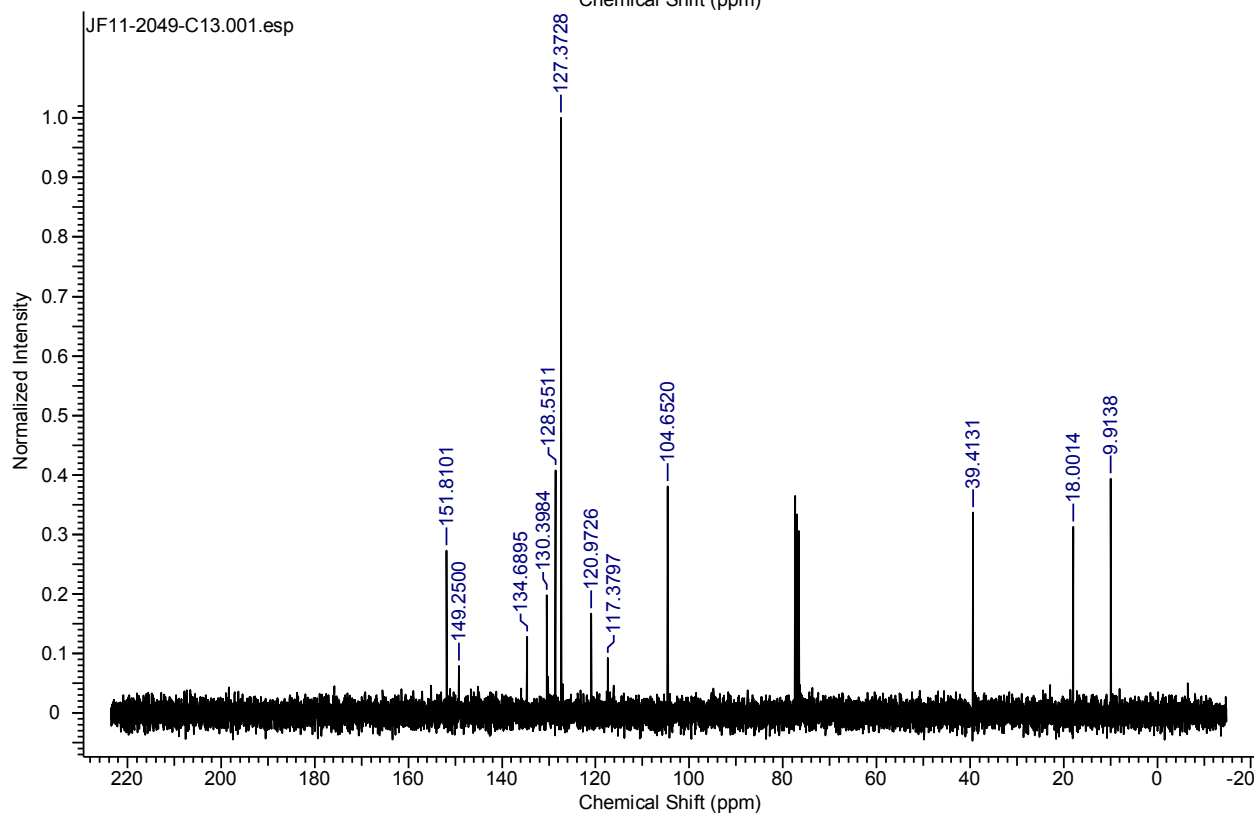

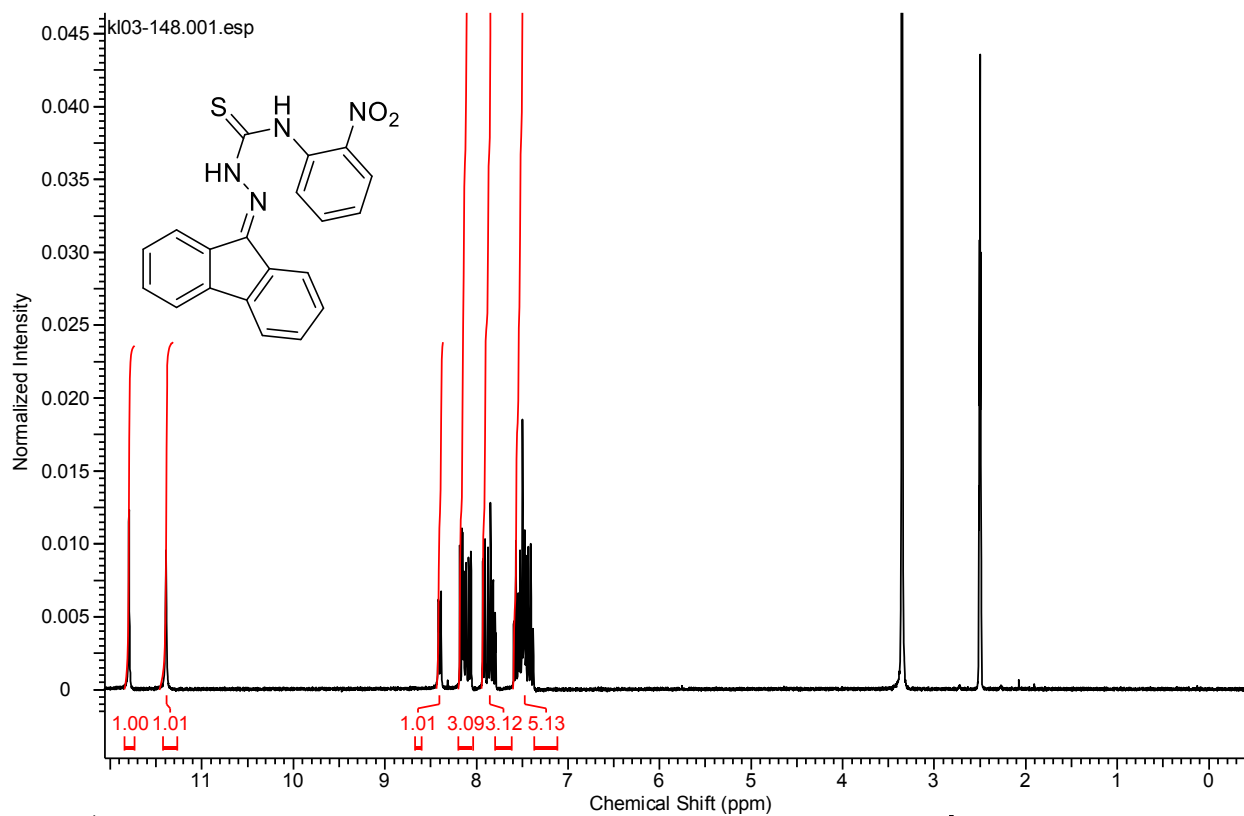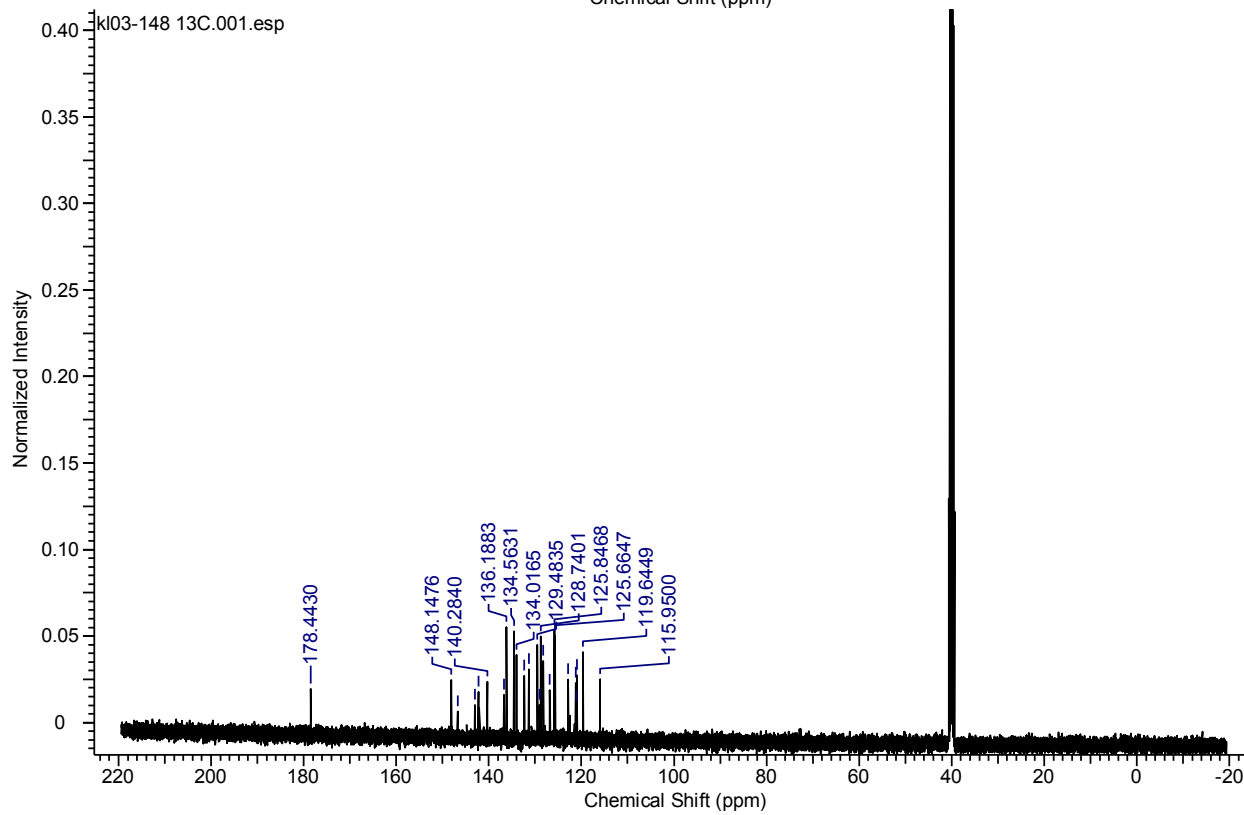

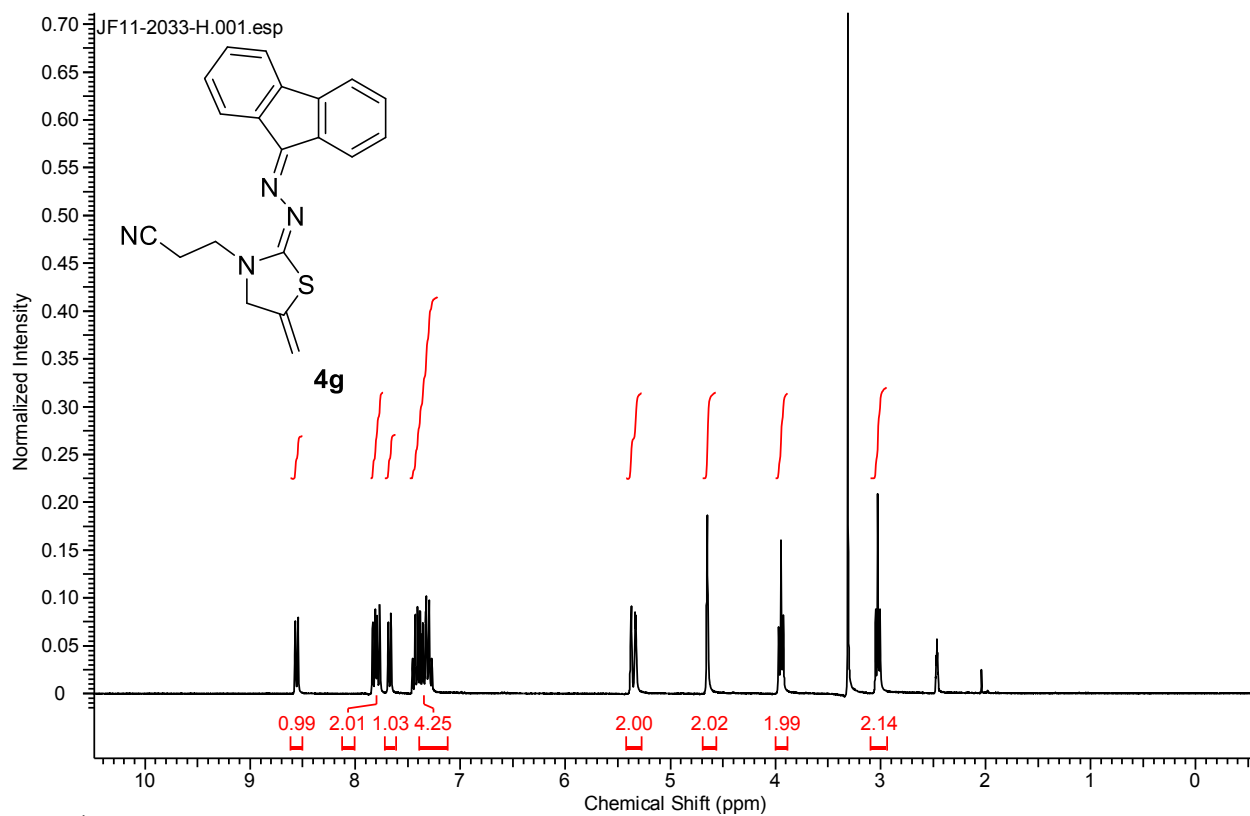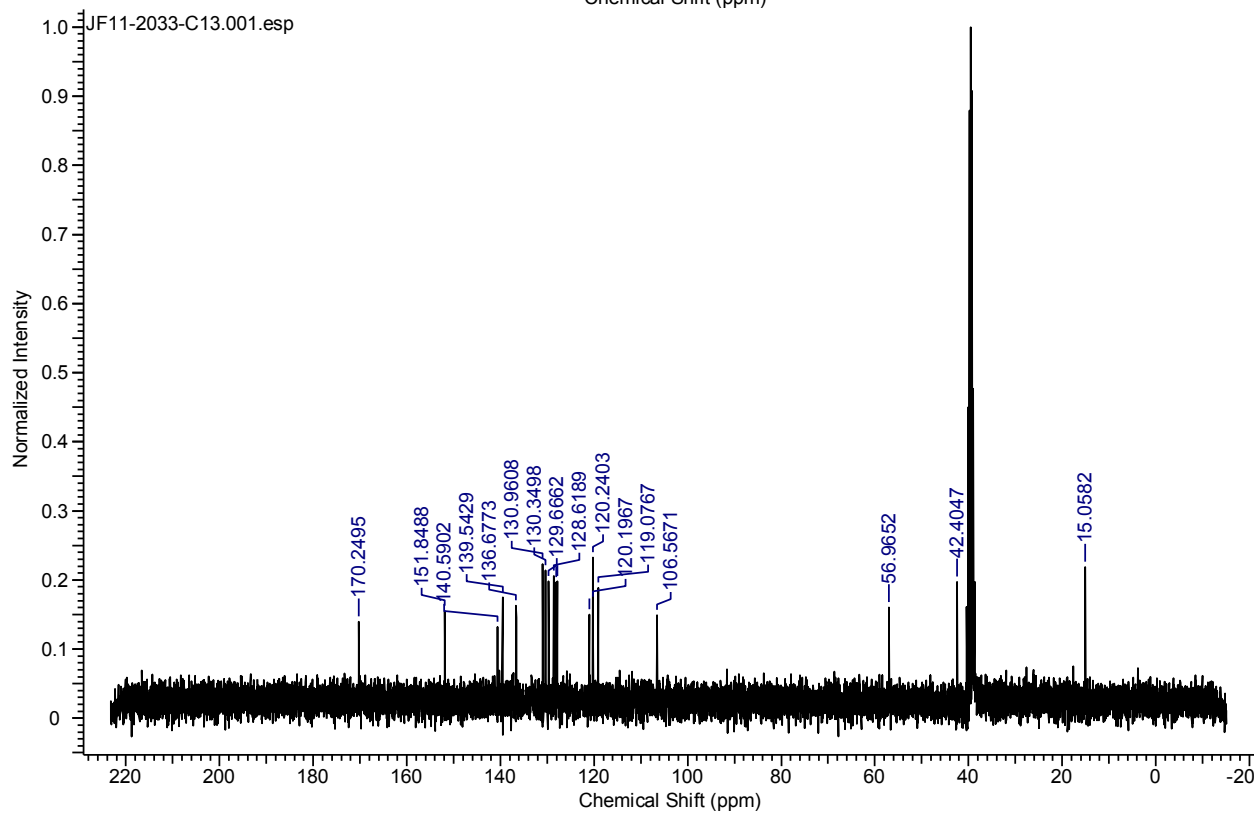



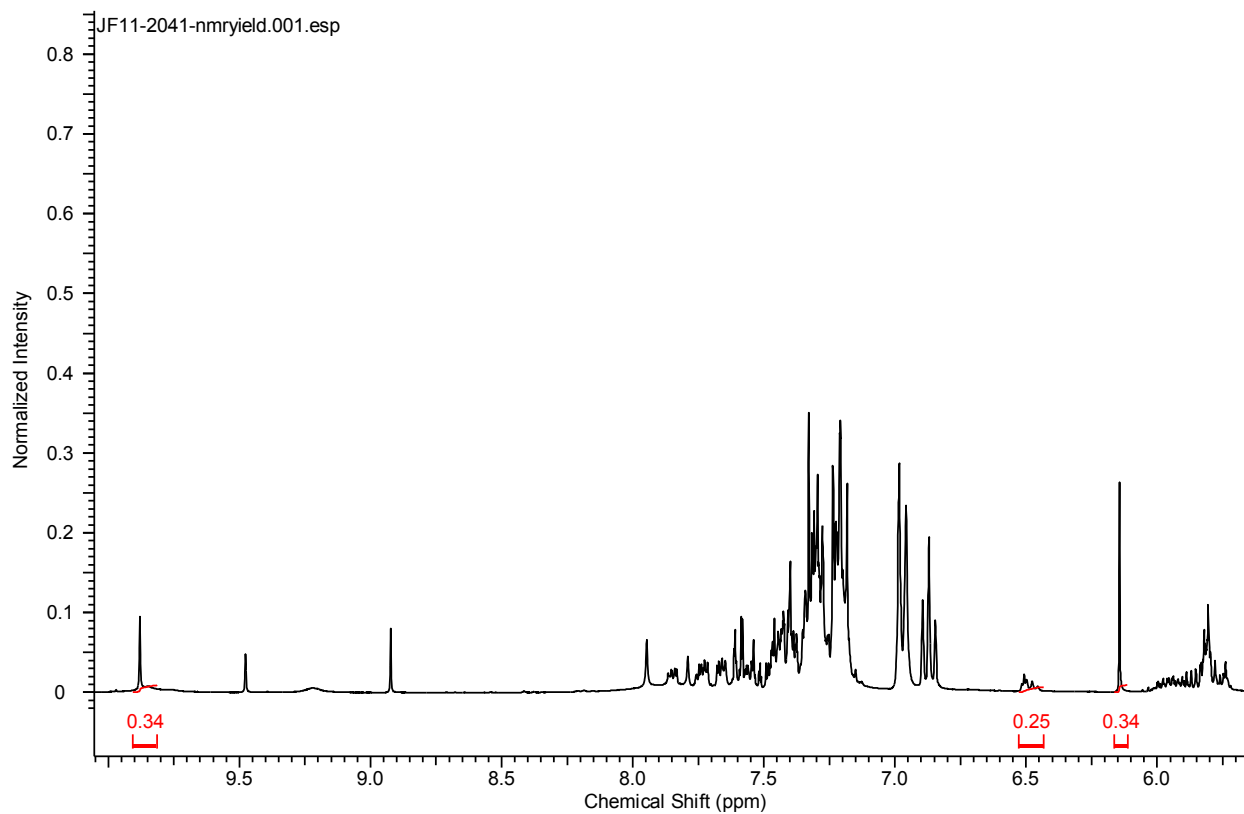

11.4 mg of TMB = 0.0678 mmol  
 $0.600 \text{ mmol} / 0.0678 \text{ mmol} = 8.34$   
3 proton (tmd signal)/8.34 = 0.34 proton

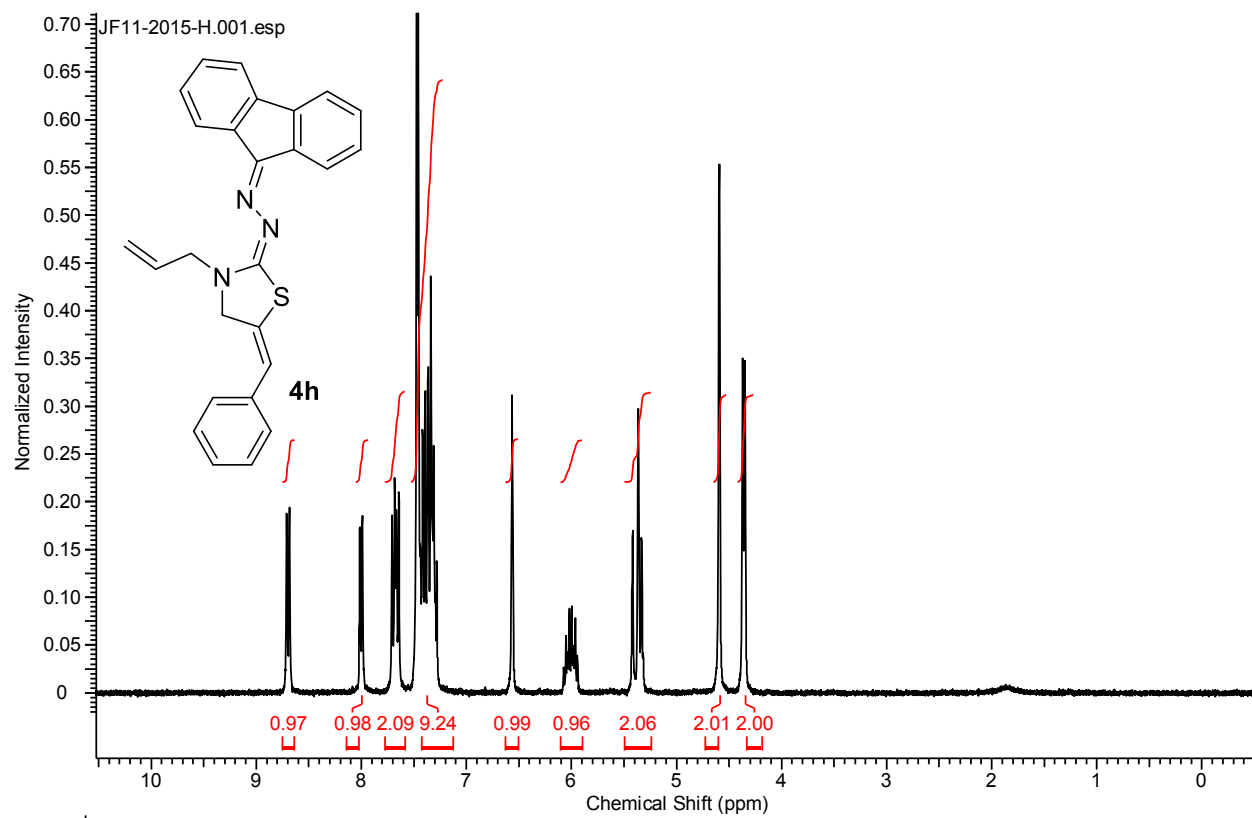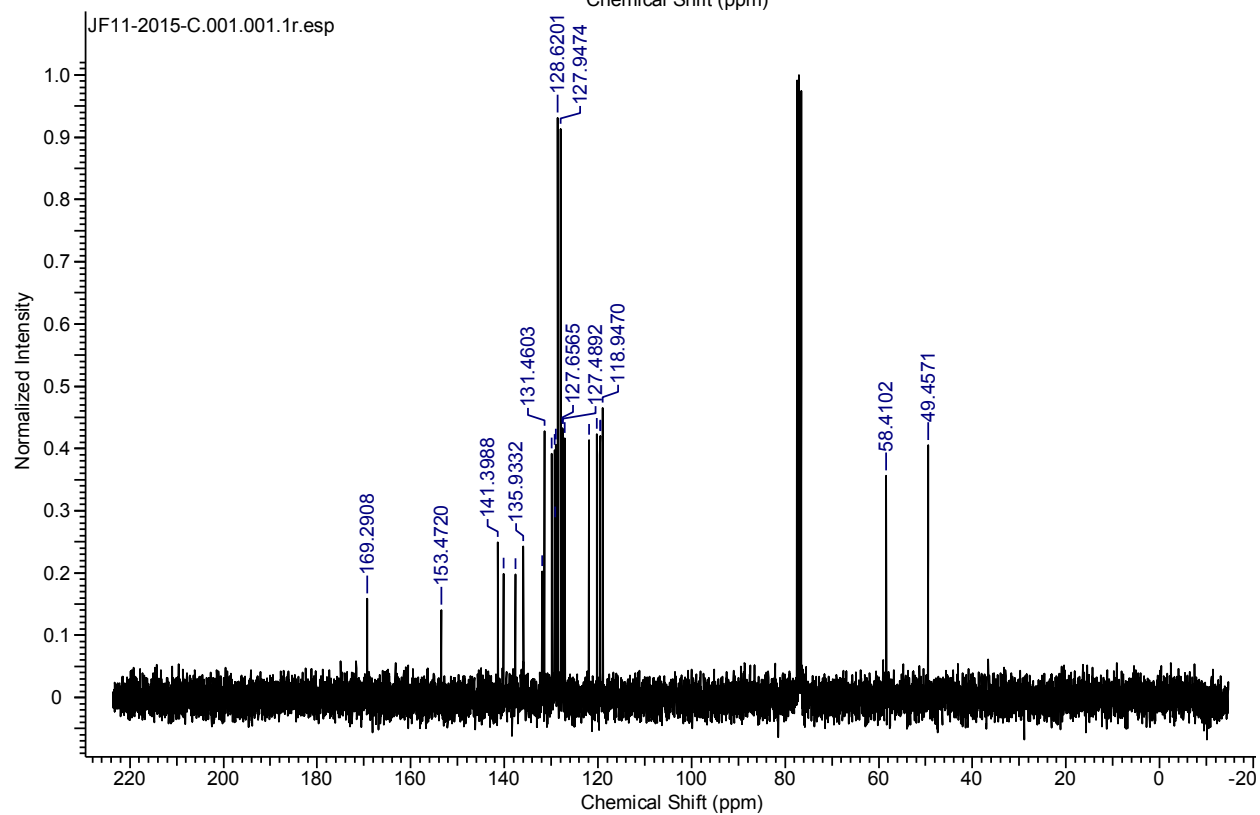

Noesy correlation between the olefinic proton and the protons on the cycle

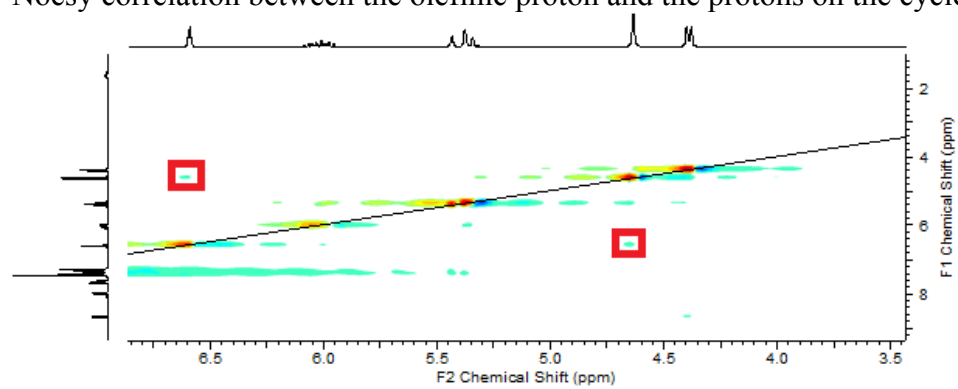

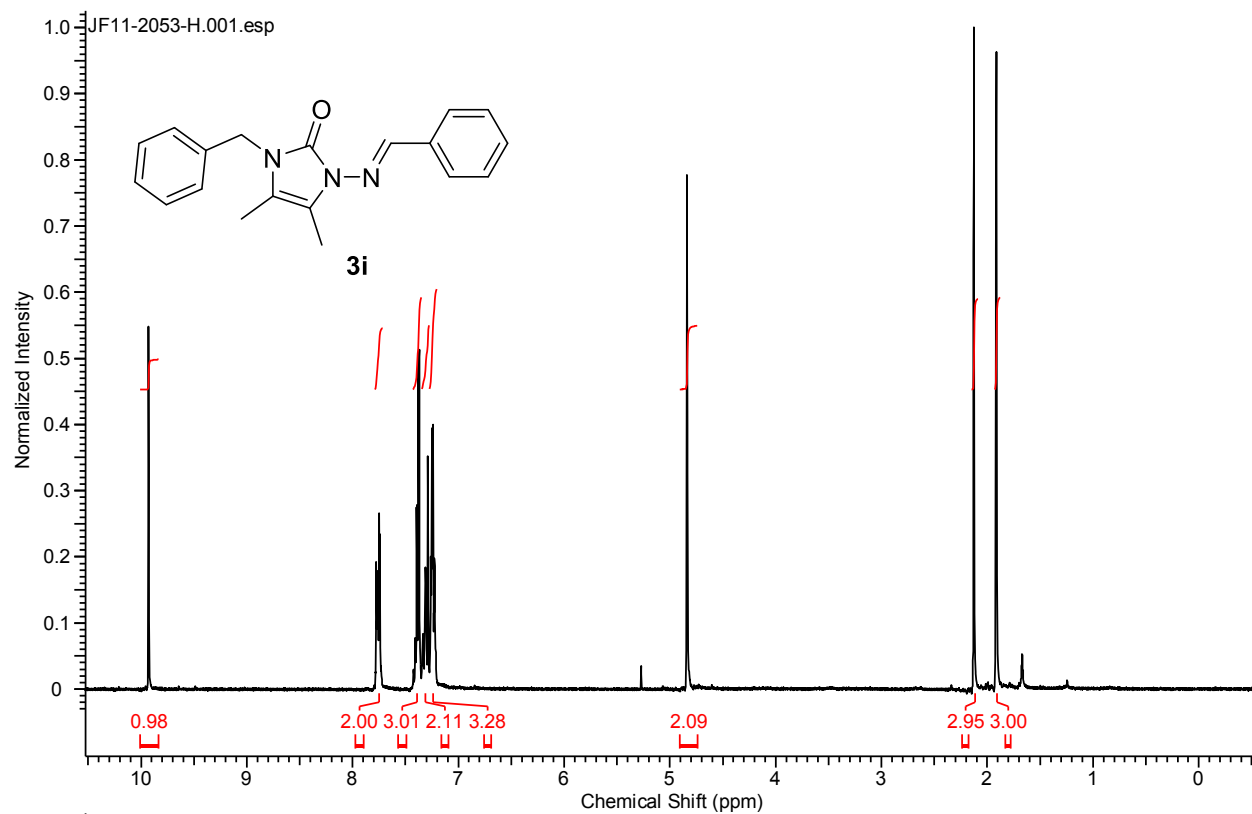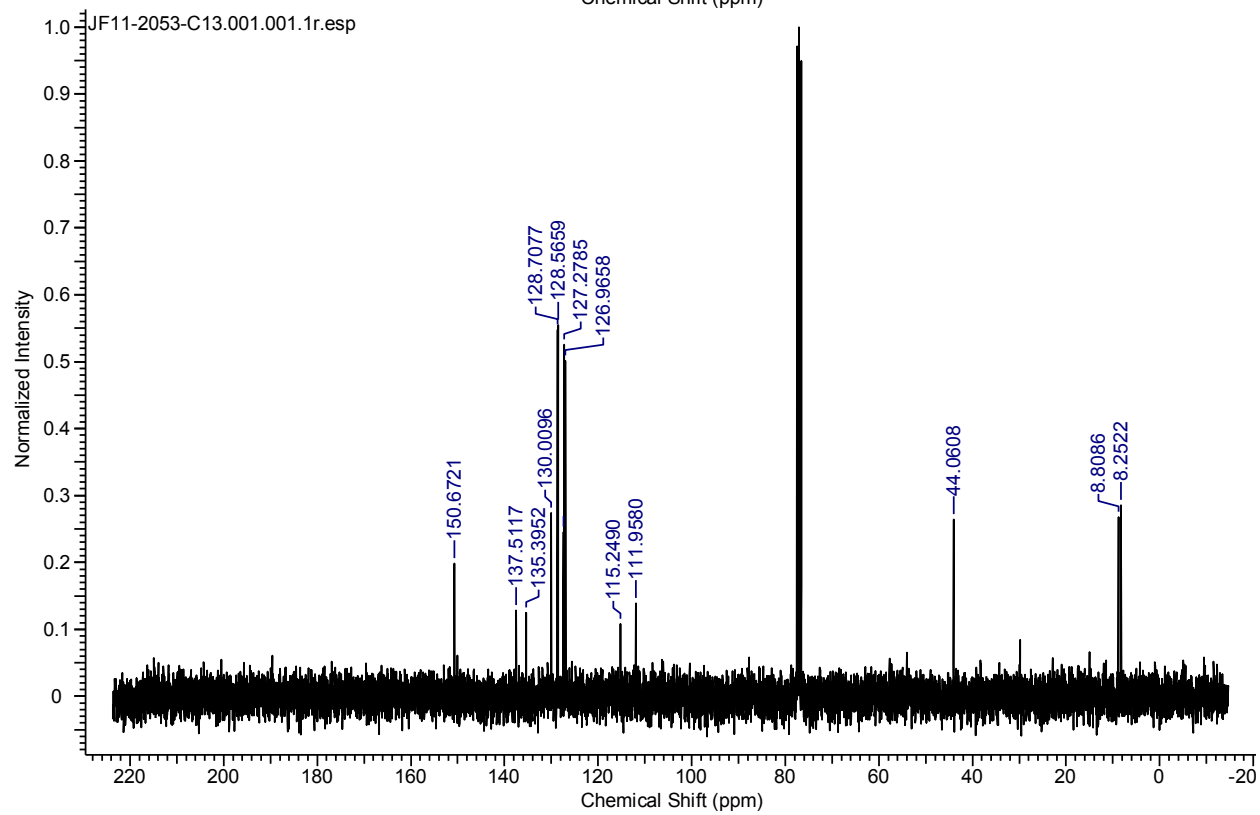

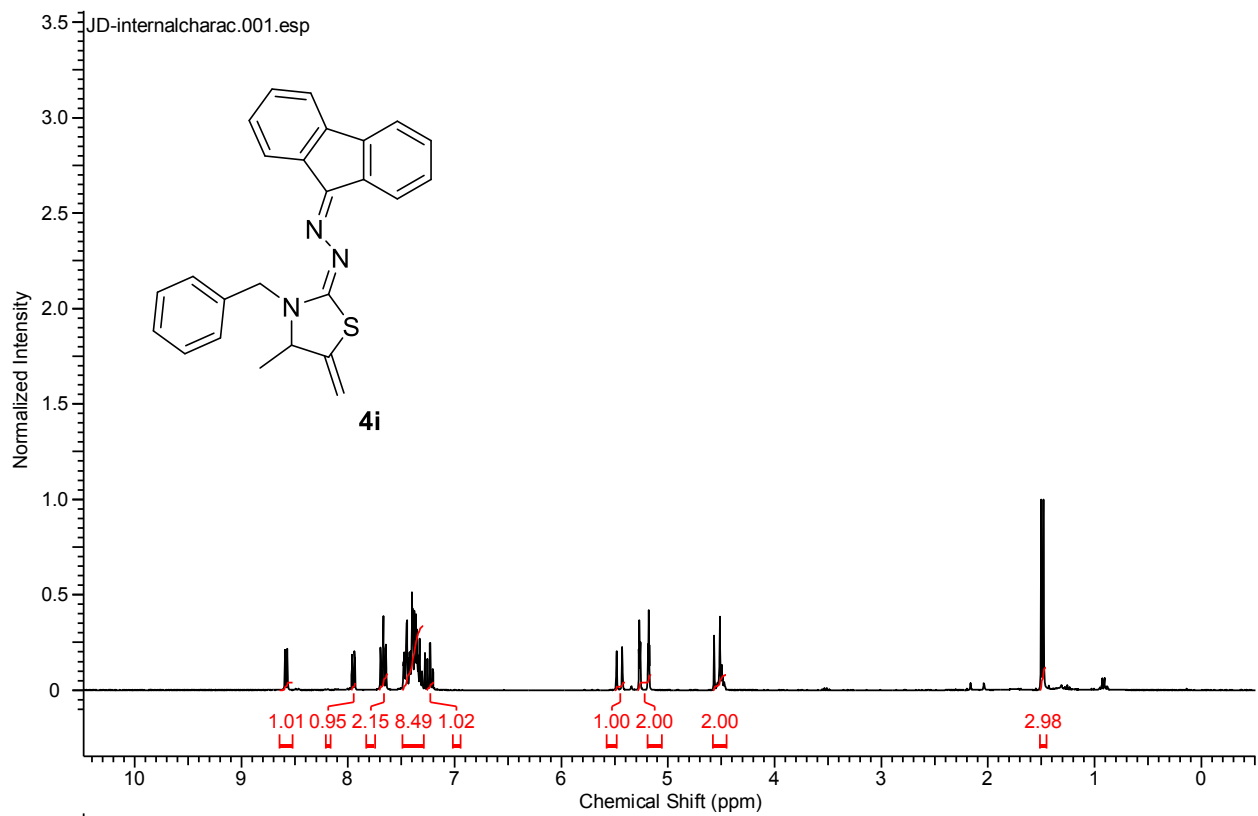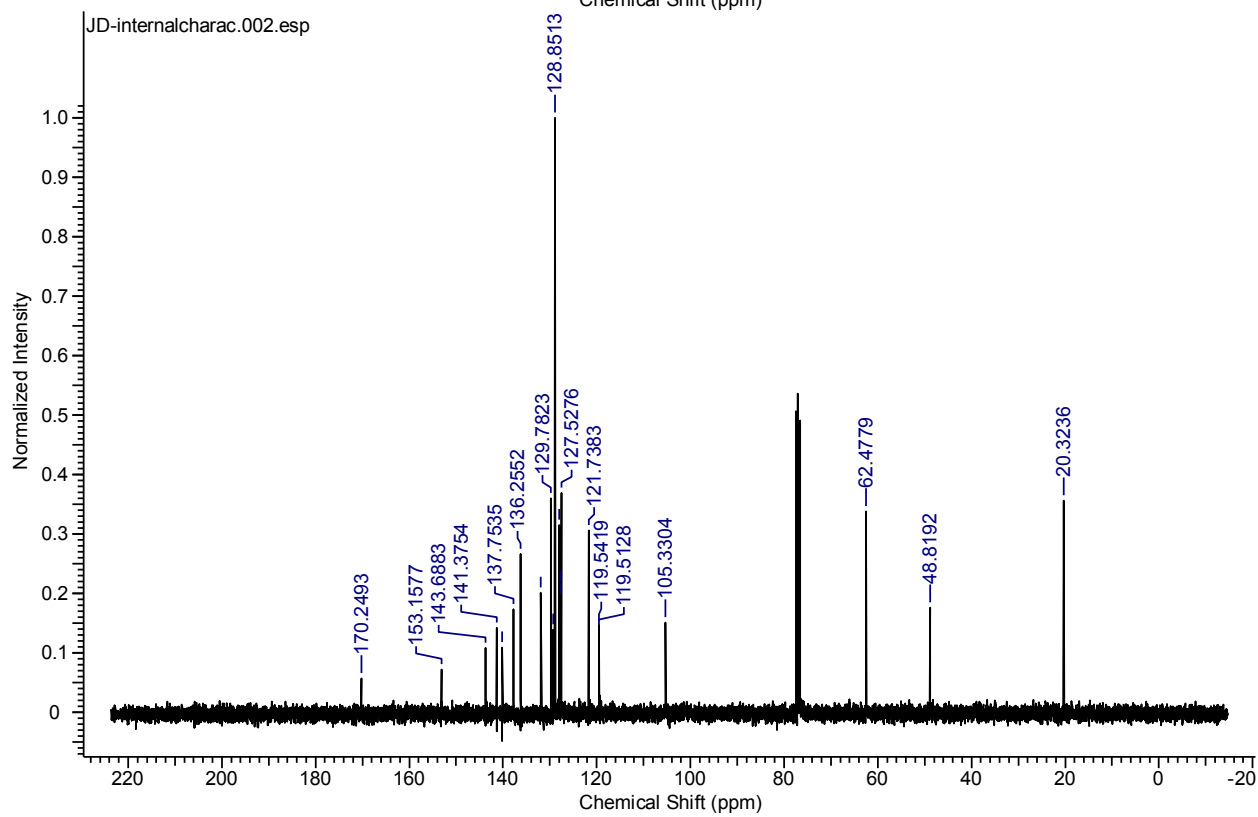

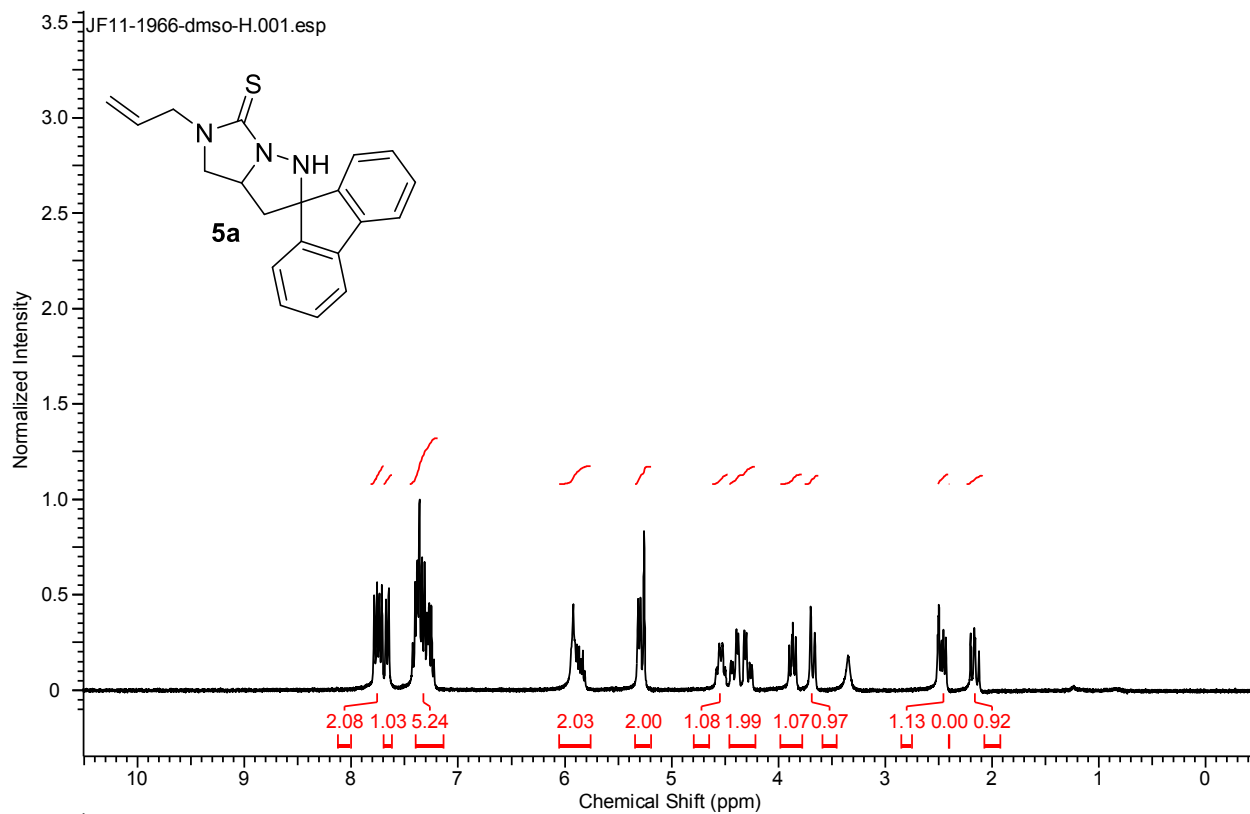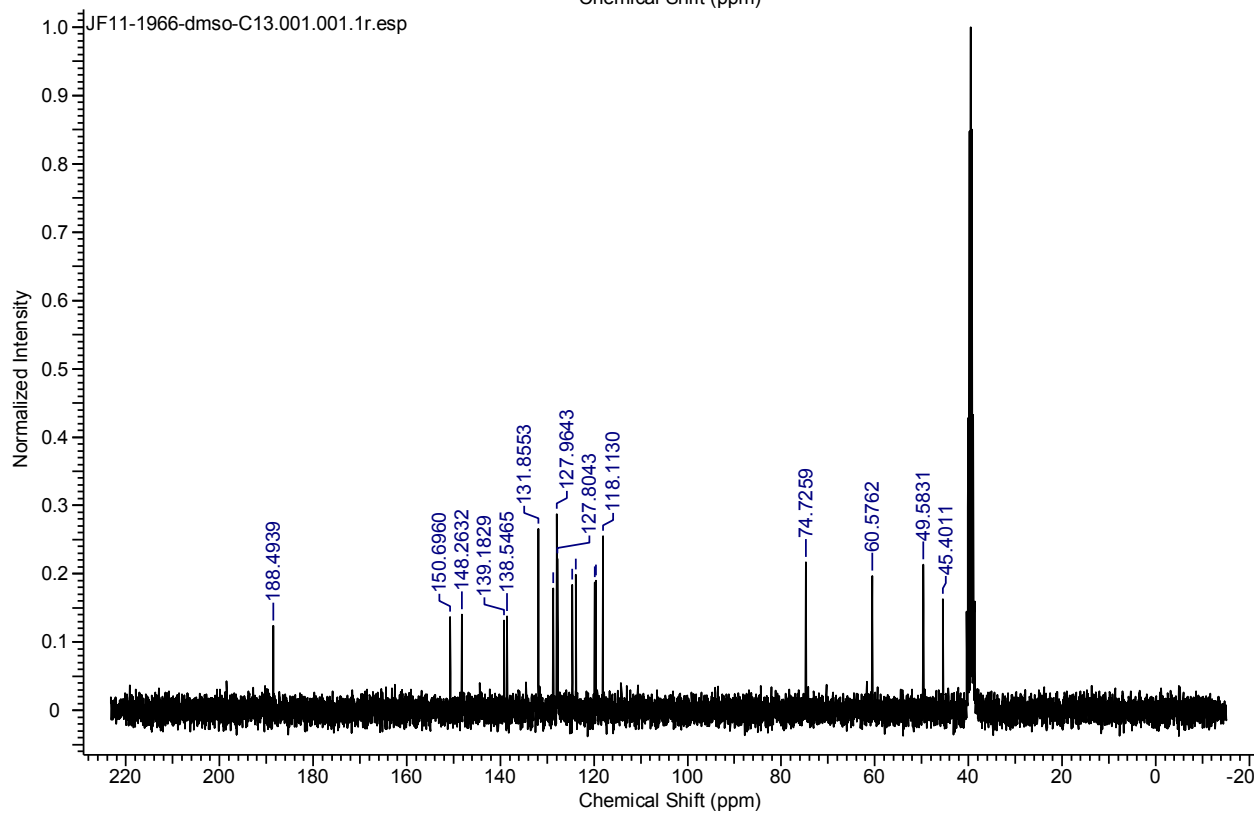

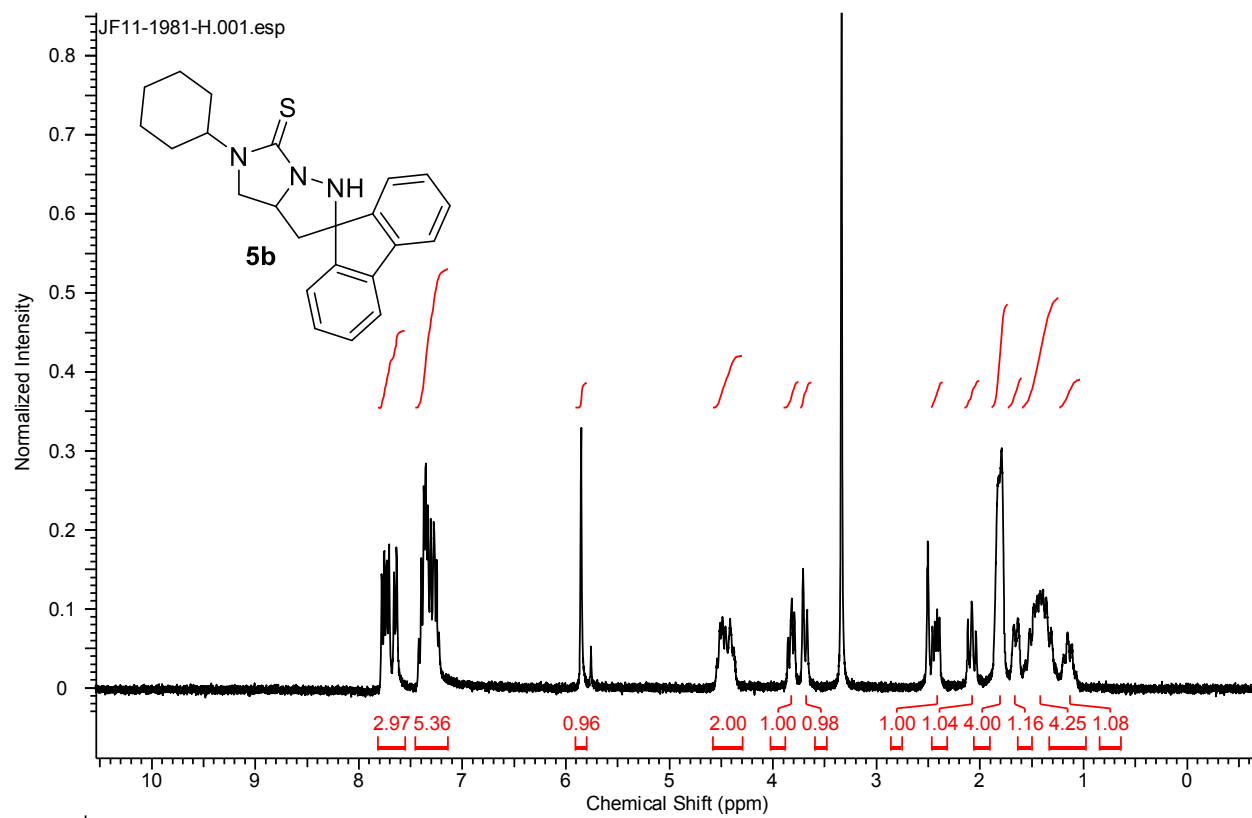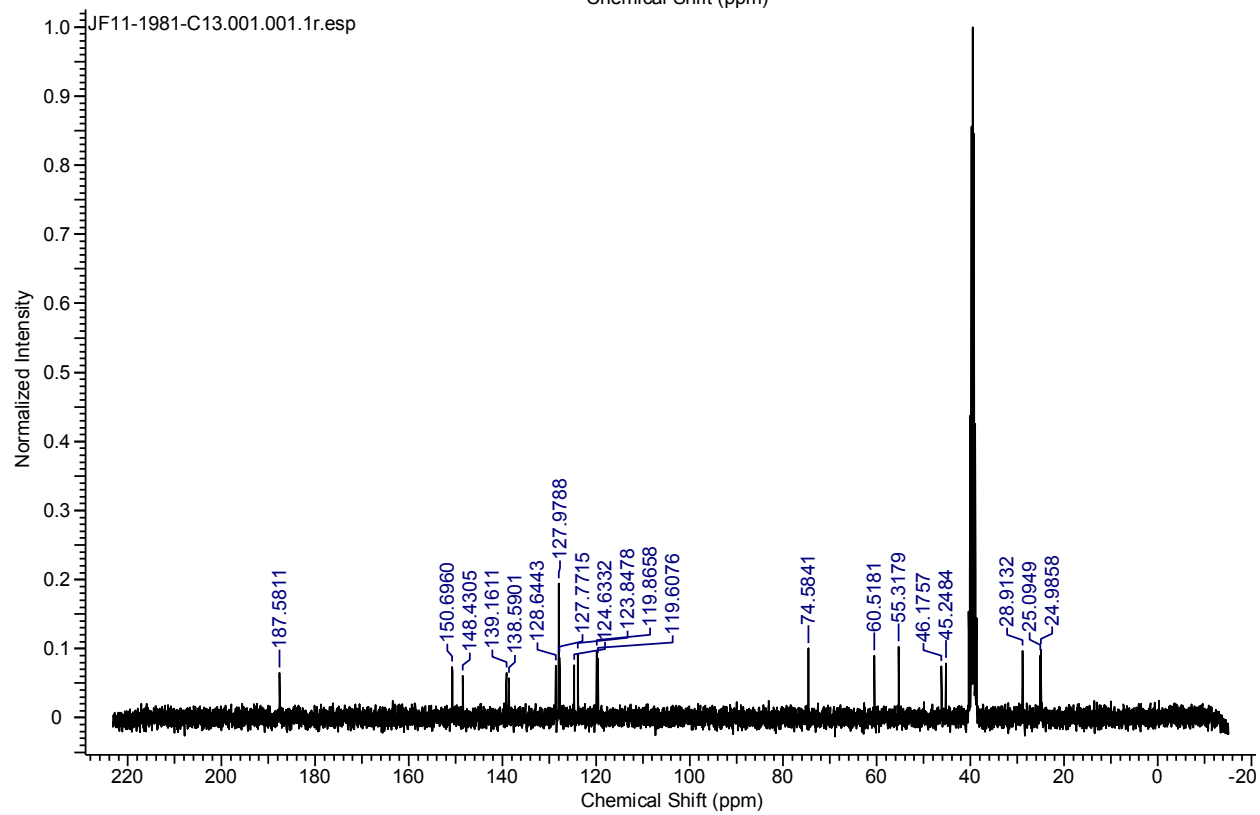

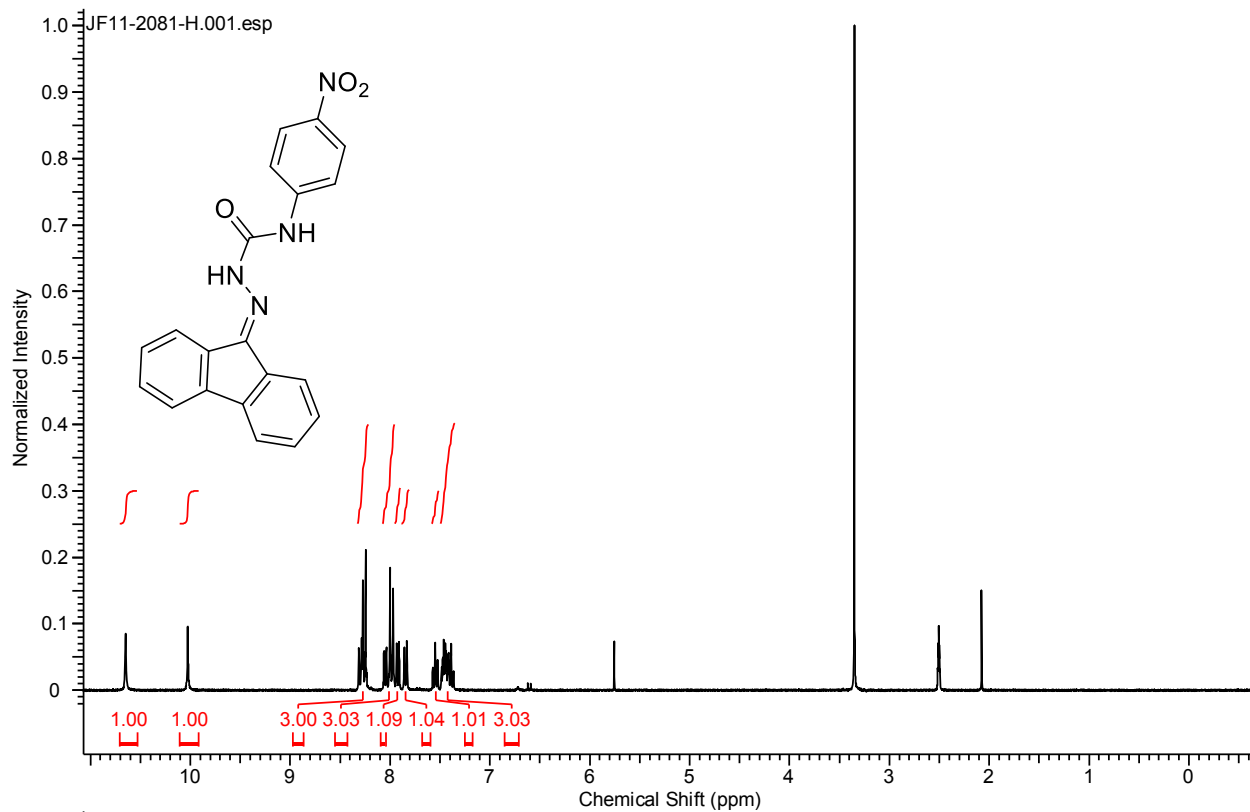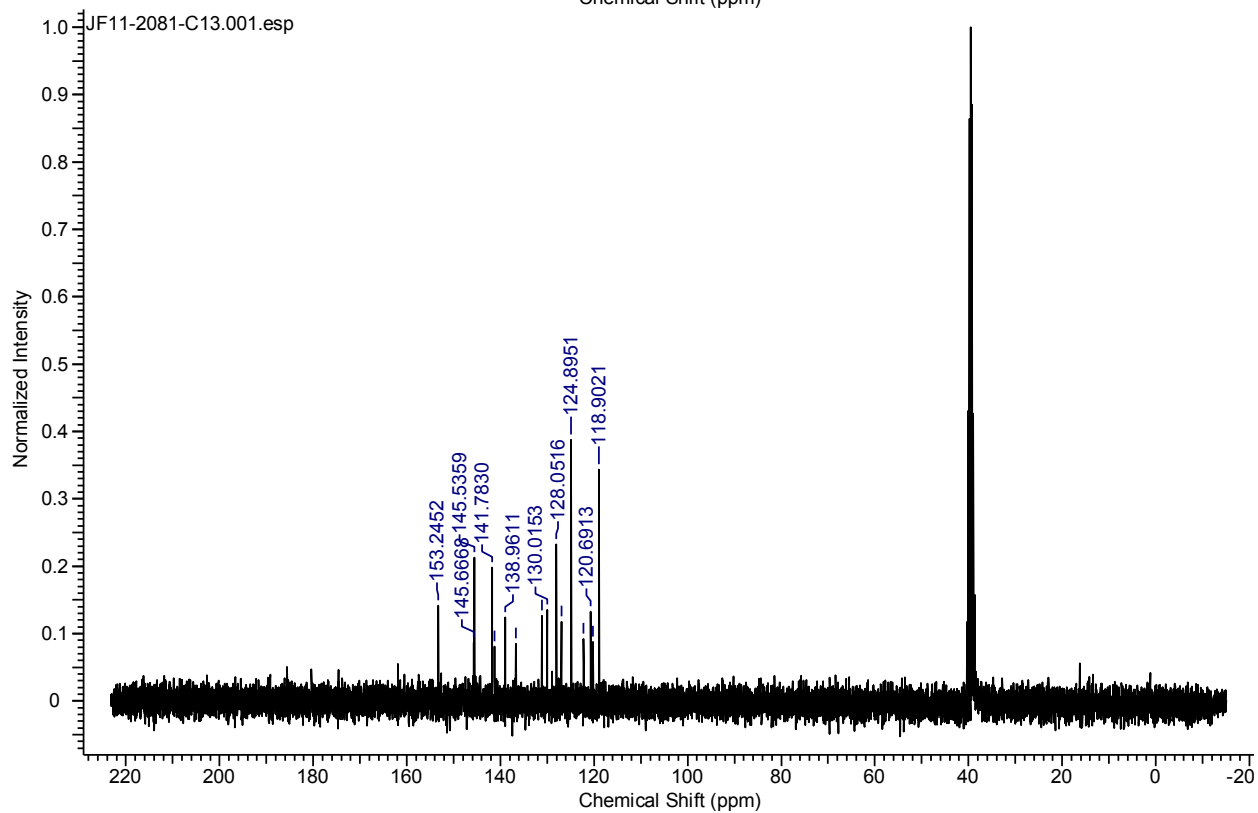

Supplement: c5cc07212c1.pdf [file c5cc07212c1.pdf]
